# Supplementary material
Source: Royal Society of Chemistry journal article supplement (doi:10.1039/d6cp00132g)
Supplement: d6cp00132g1.pdf [file d6cp00132g1.pdf]

## Supplementary Information

### **Theoretical exploration of NIR-II circularly polarized luminescence in open-shell boron embedded pyrene-naphthalene helicenes**

Qianqian Yang,<sup>a</sup> Hui Wang,<sup>a</sup> Govindarajan Saranya,<sup>b</sup> Yurao Liu,<sup>a</sup> Linlin Zhang,<sup>a</sup>  
Chunfang Zhang\*<sup>a</sup>

<sup>a</sup>College of Chemistry and Materials Science, Hebei University, Baoding 071002, PR  
China

\*Electronic mail: zhangcf@hbu.edu.cn

<sup>b</sup>Department of Physics, Dr. Mahalingam College of Engineering and Technology,  
Pollachi, Tamil Nadu 642003, India

| SI. NO.          | Table of Contents                                                                                                                                                                                                                                                                                                                                 | Page NO. |
|------------------|---------------------------------------------------------------------------------------------------------------------------------------------------------------------------------------------------------------------------------------------------------------------------------------------------------------------------------------------------|----------|
| <b>Table S1</b>  | List of abbreviations                                                                                                                                                                                                                                                                                                                             | S4       |
| <b>Table S2</b>  | Benchmark calculation to get the proper computational level.                                                                                                                                                                                                                                                                                      | S4       |
| <b>Table S3</b>  | The first emission peak, <i>D</i> , <i>Sr</i> , <i>H</i> , <i>t</i> electron excitation characteristic index, and interfragment charge transfer of different functionals                                                                                                                                                                          | S5       |
| <b>Table S4</b>  | Relative ground-state Gibbs free energy $\Delta G$ at 298.15 K for the possible <i>PP</i> , <i>MM</i> , <i>PM</i> and <i>MP</i> stereoisomers of B-1, B-2, B-3, B-4, B-5, B-6, B-7, B-8, and B-9.                                                                                                                                                 | S6       |
| <b>Table S5</b>  | Dihedral angles $\varphi$ (between the pyrene and naphthalene rings), $\varphi_1$ and $\varphi_2$ (for the two bay regions), $\varphi_3$ (between rings A and B), and $\varphi_4$ (between rings B and C) for the possible <i>PP</i> , <i>MM</i> , <i>PM</i> and <i>MP</i> stereoisomers of 1-H, B-1, B-2, B-3, B-4, B-5, B-6, B-7, B-8, and B-9. | S7       |
| <b>Table S6</b>  | Root-mean-square displacement (RMSD) of geometric structures between the ground state ( $D_0$ ) and the first excited state ( $D_1$ ) for the studied compounds.                                                                                                                                                                                  | S8       |
| <b>Table S7</b>  | Relative ground-state Gibbs free energy $\Delta G$ at 298.15 K for compound 5 and its B incorporated structures.                                                                                                                                                                                                                                  | S8       |
| <b>Table S8</b>  | Natural population analysis (NPA) charge difference ( $\Delta q$ , in units of $e$ ) between the $D_1$ state and the $D_0$ state for the studied compounds.                                                                                                                                                                                       | S9-S10   |
| <b>Table S9</b>  | Interfragment charge transfer (IFCT) and the redistributed IFCT among molecular fragments of for the studied compounds during the $D_0 \rightarrow D_1$ excitation.                                                                                                                                                                               | S11      |
| <b>Table S10</b> | The <i>D</i> -index, <i>Sr</i> -index, <i>H</i> -index, and <i>t</i> -index for the studied compounds.                                                                                                                                                                                                                                            | S12      |
| <b>Table S11</b> | Atomic spin populations in $D_1$ for the studied compounds.                                                                                                                                                                                                                                                                                       | S13      |
| <b>Table S12</b> | Atomic spin populations in $D_0$ for the studied compounds.                                                                                                                                                                                                                                                                                       | S14      |
| <b>Table S13</b> | Excitation energy, wavelength, oscillator strength, and dominant orbital transitions contributions of the $D_1 \rightarrow D_0$ emission for the <i>PP</i> isomers of studied compounds.                                                                                                                                                          | S15      |
| <b>Table S14</b> | Excitation energy, wavelength, oscillator strength, and dominant orbital transitions contributions of $D_0 \rightarrow D_1$ absorption transition for the optimized <i>PP</i> , <i>MM</i> , <i>PM</i> and <i>MP</i> stereoisomers of studied compounds.                                                                                           | S16-S17  |
| <b>Table S15</b> | The transition magnetic dipole moment $m$ , transition electric dipole moment $\mu$ , $ m / \mu $ , their angle $\theta$ , and the dissymmetry factor for boron at various positions and conformations for the                                                                                                                                    | S18      |

|                       |                                                                                                                                                                                                                                                       |          |
|-----------------------|-------------------------------------------------------------------------------------------------------------------------------------------------------------------------------------------------------------------------------------------------------|----------|
|                       | $D_0 \rightarrow D_1$ transition.                                                                                                                                                                                                                     |          |
| <b>Table S16</b>      | The relative Gibbs free energy, UV-Vis absorption peak, oscillator strength ( $f$ ), and $ g_{abs} $ of B-embedded systems in the pyrene anthracene, pyrene tetracene, and pyrene pentacene conjugated frameworks at the 4th, 5th, and 6th positions. | S19      |
| <b>Table S17-S25</b>  | Deviations in bond lengths and angles of the <i>MM</i> , <i>MP</i> , and <i>PM</i> type isomers by comparison with the corresponding <i>PP</i> structure.                                                                                             | S20-S55  |
| <b>Figure S1-S9</b>   | Interaction region indicator (IRI) for chemical bonds and weak interactions in boron-embedded compounds.                                                                                                                                              | S56-S60  |
| <b>Figure S10-S18</b> | Racemization pathway of boron-embedded compounds.                                                                                                                                                                                                     | S61-S65  |
| <b>Figure S19</b>     | Structural overlays comparing the $D_0$ and $D_1$ states for the studied compounds.                                                                                                                                                                   | S66      |
| <b>Figure S20</b>     | The dihedral angles $\varphi$ between the pyrene and naphthalene rings in the second excited states, as well as the dihedral angles $\varphi_1$ and $\varphi_2$ between the two bay regions for the studied compounds.                                | S67      |
| <b>Figure S21</b>     | Vibration modes of B-1- <i>PP</i> , B-4- <i>PP</i> , B-5- <i>PP</i> , B-8- <i>PP</i> and B-9- <i>PP</i> .                                                                                                                                             | S68      |
| <b>Figure S22</b>     | Electron-hole distributions for the $D_0 \rightarrow D_1$ transition of the studied compounds.                                                                                                                                                        | S69      |
| <b>Figure S23</b>     | Spin density distributions for the boron embedded compounds in the $D_0$ state.                                                                                                                                                                       | S69      |
| <b>Figure S24</b>     | NICS ( $1)_{ZZ}$ values for the studied compounds in the $D_0$ state.                                                                                                                                                                                 | S70      |
| <b>Figure S25</b>     | The $\beta$ wave-functions for HOMOs and SOMOs of the studied compounds in $D_0$ state.                                                                                                                                                               | S70      |
| <b>Figure S26</b>     | ECD spectra for the <i>PP</i> and <i>MM</i> pairs of the studied compounds.                                                                                                                                                                           | S71      |
| <b>Figure S27</b>     | Structures of pyrene anthracene, pyrene tetracene, and pyrene pentacene with boron embedded at the 4, 5, and 6 positions.                                                                                                                             | S72      |
| <b>Table S26</b>      | Cartesian coordinates for the optimized species at M06-2X/6-311G** level.                                                                                                                                                                             | S73-S113 |

Table S1 List of abbreviations.

| Full form                                       | Abbreviation          |
|-------------------------------------------------|-----------------------|
| Circularly polarized luminescence               | CPL                   |
| Near infrared                                   | NIR                   |
| The second near-infrared window                 | NIR-II                |
| Near infrared circularly polarized luminescence | NIR-CPL               |
| Emission dissymmetry factor                     | $g_{lum}$             |
| Absorption dissymmetry factor                   | $g_{abs}$             |
| Huang-Rhys factor                               | HRF                   |
| Interfragment charge transfer                   | IFCT                  |
| Nuclear independent chemical shift              | NICS(1) <sub>ZZ</sub> |
| Root-mean-square displacements                  | RMSD                  |
| Transition electric dipole moment               | TEDM                  |
| Transition magnetic dipole moment               | TMDM                  |

Table S2. Benchmark calculation to get the proper computational level, where the 6-311G\*\* basis set is used for all functionals. The dihedral angle ( $\varphi$ ) between the pyrene ring and the naphthalene ring and the computational UV-vis peak for 1-H-PP and the experimental UV-vis peaks for 1-CH<sub>3</sub> and 3a are taken as reference.

| Compounds                      | Functionals | dihedral angle (°) | S <sub>1</sub> (nm) |
|--------------------------------|-------------|--------------------|---------------------|
| 1-H-PP                         | B3LYP       | 32.80              | 403                 |
|                                | M06-2X      | 30.17              | 344                 |
|                                | ωB97XD      | 30.09              | 336                 |
|                                | PBE         | 31.87              | 487                 |
| 1-CH <sub>3</sub> <sup>a</sup> | experiment  | 27.69              | -                   |
| 3a <sup>b</sup>                | experiment  | -                  | 343 <sup>c</sup>    |

<sup>a</sup>From Ref. NPG Asia Materials 2015, 7, e230.

<sup>b</sup>From Ref. Dyes Pigments 2015, 112, 176-182.

<sup>c</sup>Absorption peak in thin film.

Table S3. The first emission peak,  $D$ ,  $Sr$ ,  $H$ ,  $t$  electron excitation characteristic index, and interfragment charge transfer of different functionals

|                                  |             | B3LYP | M06-2X | $\omega$ B97XD | PBE   |
|----------------------------------|-------------|-------|--------|----------------|-------|
| First emission peak $D_1$ (nm)   |             | 1306  | 1011   | 973            | 2159  |
| $D$ (Å)                          |             | 2.93  | 1.63   | 1.17           | 4.16  |
| $Sr$ (a.u.)                      |             | 0.56  | 0.63   | 0.71           | 0.47  |
| $H$ (Å)                          |             | 3.22  | 3.59   | 3.22           | 3.20  |
| $t$ (Å)                          |             | 0.66  | -1.66  | -1.03          | 1.89  |
| Interfragment<br>charge transfer | pyrene      | 0.39  | 0.14   | 0.09           | 0.64  |
|                                  | naphthalene | -0.33 | -0.11  | -0.07          | -0.54 |
|                                  | a           | -0.01 | -0.01  | -0.01          | 0.00  |
|                                  | b           | -0.01 | -0.01  | -0.01          | 0.00  |
|                                  | c           | -0.01 | 0.00   | 0.00           | -0.04 |
|                                  | d           | -0.03 | 0.00   | 0.00           | -0.05 |

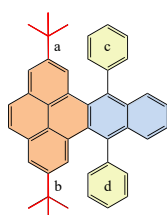

The results show that PBE significantly overestimates the emission wavelength (2159 nm) and significantly exaggerates the charge transfer character. B3LYP also produces an evident red shift and overestimates the charge transfer contribution. In contrast,  $\omega$ B97XD yields an emission wavelength comparable to that of M06-2X but slightly underestimates the extent of charge transfer in the system. Overall, M06-2X provide a balanced and reliable description both the emission wavelength and charge transfer character, making it more suitable for the system investigated herein. Wu et al.<sup>[S1]</sup> systematically evaluated the performance of various functionals based on experimental spectra of 71 organic molecules and demonstrated that M06-2X achieves the highest accuracy in predicting excited-state energies, oscillator strengths and exciton reorganization energies, with corresponding  $R^2$  values of 0.948, 0.944 and 0.690, respectively. Using M06-2X as the primary functional, Ulukan et al.<sup>[S2]</sup> calculated the torsion angles,  $\Delta E_{ST}$  and spin-orbit coupling of 17 TADF compounds and 2 non-TADF compounds, confirming its capability to accurately describe charge-transfer excited states. Similarly, Chaudhuri et al.<sup>[S3]</sup> performed a comparative study on a typical D-A-D type TADF molecule and showed that M06-2X can precisely optimize both ground and excited state geometries, as well as accurately predict excited-state energy levels  $\Delta E_{ST}$ . Moreover, for open-shell triplet systems, M06-2X functional does not suffer from triplet instability and outperforms most global hybrid functionals in calculating triplet excitation energies. In summary, the M06-2X functional is well-suited for describing the ground state, excited state and open-shell charge-transfer systems considered in the present study.

[S1] X. Wu, X. Xie and A. Troisi, Calibration of several first excited state properties for organic molecules through systematic comparison of TDDFT with experimental spectra, *J. Mater. Chem. C*, 2024, **12**, 18886.

[S2] P. Ulukan, E. E. Bas, R. B. Ozek, C. Dal Kaynak, A. Monari, V. Aviyente and S. Catak, Computational descriptor analysis on excited state behaviours of a series of TADF and non-TADF compounds, *Phys. Chem. Chem. Phys.*, 2022, **24**, 16167-16182.

[S3] D. Chaudhuri and C. H. Patterson, TDDFT versus GW/BSE Methods for Prediction of Light Absorption and Emission in a TADF Emitter, *J. Phys. Chem. A*, 2022, **126**, 9627-9643.

Table S4. Relative ground-state Gibbs free energy  $\Delta G$  at 298.15 K for the possible *PP*, *MM*, *PM* and *MP* stereoisomers of B-1, B-2, B-3, B-4, B-5, B-6, B-7, B-8, and B-9. All the energies are in kcal·mol<sup>-1</sup> and respective to those of B-6-*PP*.

| Compounds         | $\Delta G$ | Compounds         | $\Delta G$ |
|-------------------|------------|-------------------|------------|
| B-1- <i>PP/MM</i> | 15.10      | B-1- <i>MP/PM</i> | 16.83      |
| B-2- <i>PP/MM</i> | 19.82      | B-2- <i>MP/PM</i> | 21.97      |
| B-3- <i>PP/MM</i> | 22.29      | B-3- <i>MP/PM</i> | 24.03      |
| B-4- <i>PP/MM</i> | 9.78       | B-4- <i>MP/PM</i> | -          |
| B-5- <i>PP/MM</i> | 6.41       | B-5- <i>MP/PM</i> | -          |
| B-6- <i>PP/MM</i> | 0.00       | B-6- <i>MP/PM</i> | 3.23       |
| B-7- <i>PP/MM</i> | 20.77      | B-7- <i>MP/PM</i> | 25.56      |
| B-8- <i>PP/MM</i> | 14.89      | B-8- <i>MP/PM</i> | 18.46      |
| B-9- <i>PP/MM</i> | 19.28      | B-9- <i>MP/PM</i> | 22.52      |

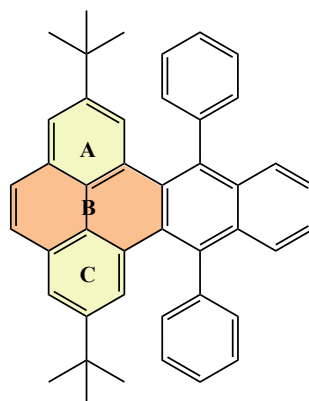

Table S5. Dihedral angles  $\varphi$  (between the pyrene and naphthalene rings),  $\varphi_1$  and  $\varphi_2$  (for the two bay regions),  $\varphi_3$  (between rings A and B), and  $\varphi_4$  (between rings B and C) for the possible *PP*, *MM*, *PM* and *MP* stereoisomers of the ground states of 1-H, B-1, B-2, B-3, B-4, B-5, B-6, B-7, B-8 and B-9. All angles are expressed in degrees ( $^\circ$ ).

| Compounds         | $ \varphi $ | $ \varphi_1 $ | $ \varphi_2 $ | $ \varphi_3 $ | $ \varphi_4 $ | Compounds         | $ \varphi $ | $ \varphi_1 $ | $ \varphi_2 $ | $ \varphi_3 $ | $ \varphi_4 $ | $\Delta\varphi_{MP/PM-PP/MM}$ | $\frac{\Delta \varphi_{1(B-PP/MM-1-H-PP/MM)}  + \Delta \varphi_{2(B-PP/MM-1-H-PP/MM)} }{2}$ |
|-------------------|-------------|---------------|---------------|---------------|---------------|-------------------|-------------|---------------|---------------|---------------|---------------|-------------------------------|---------------------------------------------------------------------------------------------|
| 1-H- <i>PP/MM</i> | 30.17       | 20.26         | 21.89         | 6.09          | 7.04          | 1-H- <i>MP/PM</i> | 20.85       | 22.55         | 25.93         | 16.53         | 16.74         | -9.32                         | -                                                                                           |
| B-1- <i>PP/MM</i> | 32.91       | 21.18         | 24.13         | 7.07          | 6.23          | B-1- <i>MP/PM</i> | 25.21       | 26.27         | 28.46         | 19.83         | 18.46         | -7.7                          | 1.58                                                                                        |
| B-2- <i>PP/MM</i> | 30.51       | 23.01         | 21.31         | 2.49          | 11.47         | B-2- <i>MP/PM</i> | 21.89       | 27.55         | 25.76         | 20.44         | 17.67         | -8.62                         | 1.67                                                                                        |
| B-3- <i>PP/MM</i> | 26.23       | 10.47         | 29.13         | 3.22          | 11.52         | B-3- <i>MP/PM</i> | 21.05       | 21.03         | 32.77         | 16.17         | 18.20         | -5.18                         | 8.51                                                                                        |
| B-4- <i>PP/MM</i> | 29.15       | 4.20          | 30.62         | 3.97          | 7.71          | B-4- <i>MP/PM</i> | -           | -             | -             | -             | -             | -                             | 12.39                                                                                       |
| B-5- <i>PP/MM</i> | 30.90       | 11.05         | 29.70         | 2.14          | 8.69          | B-5- <i>MP/PM</i> | -           | -             | -             | -             | -             | -                             | 8.51                                                                                        |
| B-6- <i>PP/MM</i> | 29.74       | 16.72         | 26.53         | 5.53          | 6.16          | B-6- <i>MP/PM</i> | 18.05       | 15.06         | 26.76         | 12.68         | 15.93         | -11.69                        | 4.09                                                                                        |
| B-7- <i>PP/MM</i> | 34.23       | 25.79         | 21.62         | 5.97          | 6.49          | B-7- <i>MP/PM</i> | 15.65       | 19.15         | 26.21         | 15.95         | 17.06         | -18.58                        | 2.90                                                                                        |
| B-8- <i>PP/MM</i> | 32.24       | 20.34         | 22.82         | 6.28          | 6.40          | B-8- <i>MP/PM</i> | 22.14       | 26.23         | 22.94         | 17.03         | 16.82         | -10.1                         | 0.51                                                                                        |
| B-9- <i>PP/MM</i> | 32.85       | 21.98         | 21.89         | 6.09          | 7.04          | B-9- <i>MP/PM</i> | 22.32       | 25.07         | 25.10         | 19.83         | 18.46         | -10.53                        | 0.86                                                                                        |

Table S6. Root-mean-square displacement (RMSD) of geometric structures between the ground state ( $D_0$ ) and the first excited state ( $D_1$ ) for compounds B-1-PP, B-2-PP, B-3-PP, B-4-PP, B-5-PP, B-6-PP, B-7-PP, B-8-PP, and B-9-PP.

|        | RMSD(Å) |
|--------|---------|
| B-1-PP | 0.05    |
| B-2-PP | 0.11    |
| B-3-PP | 0.30    |
| B-4-PP | 0.13    |
| B-5-PP | 0.24    |
| B-6-PP | 0.10    |
| B-7-PP | 0.19    |
| B-8-PP | 0.10    |
| B-9-PP | 0.12    |

Table S7. Ground-state Gibbs free energy  $G$  at 298.15 K for B incorporated compound 5 and its isomers.<sup>[S4]</sup>

| Compounds     | 5            | 5-1          | 5-2          | 5-3         |
|---------------|--------------|--------------|--------------|-------------|
| $G$ (Hartree) | -1298.027153 | -1297.948259 | -1297.969666 | -1297.97331 |

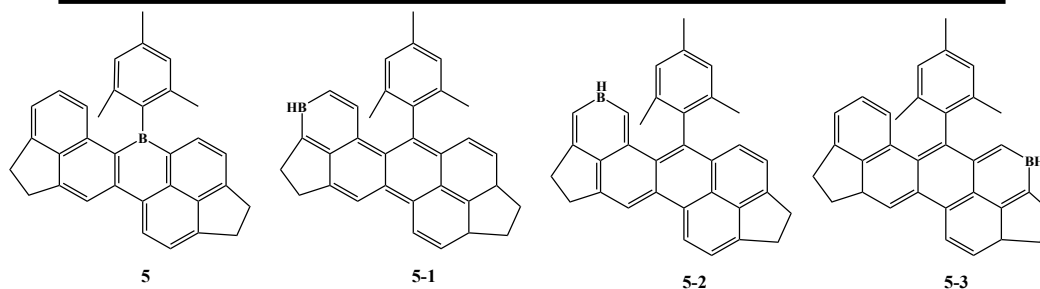

The boron-embedded structure at the central 6-position (B-6-PP) shares a closely related rigid  $\pi$ -conjugated framework and boron coordination environment with compound 5, which has been experimentally synthesized.<sup>[S4]</sup> Thermodynamic analysis shows that the central boron-substituted isomer (compound 5) possesses the lowest Gibbs free energy ( $G = -1298.027153$  Hartree), compared with its peripheral isomers 5-1 ( $-1297.948259$  Hartree), 5-2 ( $-1297.969666$  Hartree), and 5-3 ( $-1297.973310$  Hartree), indicating superior thermodynamic stability. Consistently, within the boron-embedded pyrene-naphthalene derivatives investigated in this work, B-6-PP also exhibits the lowest Gibbs free energy among all isomers. These results suggest that the central boron-embedded structure is both thermodynamically favored and experimentally feasible.

[S4] K. Schickedanz, J. Radtke, M. Bolte, H. W. Lerner and M. Wagner, Facile route to quadruply annulated borepins, *J. Am. Chem. Soc.*, 2017, **139**, 2842-2851.

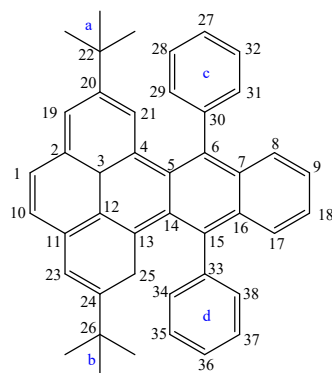

Table S8. Natural population analysis (NPA) charge difference ( $\Delta q$ , in units of e) between the  $D_1$  state and the  $D_0$  state for compounds 1-*H-PP*, B-1-*PP*, B-2-*PP*, B-3-*PP*, B-4-*PP*, B-5-*PP*, B-6-*PP*, B-7-*PP*, B-8-*PP* and B-9-*PP*.

| No. | $\Delta q$     |                |                |                |                |                |                |                |                |                |
|-----|----------------|----------------|----------------|----------------|----------------|----------------|----------------|----------------|----------------|----------------|
|     | 1- <i>H-PP</i> | B-1- <i>PP</i> | B-2- <i>PP</i> | B-3- <i>PP</i> | B-4- <i>PP</i> | B-5- <i>PP</i> | B-6- <i>PP</i> | B-7- <i>PP</i> | B-8- <i>PP</i> | B-9- <i>PP</i> |
| 1   | 0.00           | -0.17          | 0.12           | 0.09           | -0.03          | 0.01           | 0.01           | 0.01           | 0.00           | 0.00           |
| 2   | 0.01           | 0.15           | -0.23          | -0.12          | 0.15           | 0.02           | 0.03           | 0.00           | 0.00           | -0.01          |
| 3   | 0.00           | 0.03           | -0.04          | -0.22          | 0.05           | -0.03          | -0.04          | 0.00           | -0.01          | 0.02           |
| 4   | 0.00           | 0.02           | 0.19           | 0.03           | -0.23          | 0.07           | 0.02           | 0.01           | -0.01          | -0.03          |
| 5   | -0.01          | -0.01          | -0.03          | 0.02           | 0.07           | -0.19          | -0.07          | 0.05           | 0.02           | 0.13           |
| 6   | -0.01          | 0.02           | 0.05           | 0.01           | -0.03          | -0.18          | -0.18          | -0.07          | -0.03          | -0.08          |
| 7   | 0.01           | 0.00           | -0.02          | -0.01          | 0.02           | 0.14           | 0.04           | -0.13          | 0.05           | 0.15           |
| 8   | 0.00           | 0.00           | 0.01           | 0.00           | -0.01          | -0.07          | -0.02          | 0.09           | -0.20          | -0.23          |
| 9   | 0.00           | 0.01           | 0.00           | 0.00           | 0.01           | 0.08           | 0.00           | -0.05          | -0.03          | -0.17          |
| 10  | 0.01           | -0.28          | -0.07          | -0.04          | 0.05           | -0.01          | 0.01           | 0.03           | 0.01           | 0.01           |
| 11  | -0.01          | 0.15           | 0.04           | 0.00           | -0.04          | -0.02          | -0.01          | 0.01           | 0.00           | 0.01           |
| 12  | 0.00           | -0.03          | 0.04           | 0.08           | -0.01          | 0.03           | 0.01           | -0.04          | 0.00           | -0.02          |
| 13  | 0.01           | 0.08           | -0.03          | -0.04          | 0.06           | 0.01           | -0.01          | 0.07           | -0.01          | 0.01           |

|    |       |       |       |       |       |       |       |       |       |       |
|----|-------|-------|-------|-------|-------|-------|-------|-------|-------|-------|
| 14 | -0.01 | -0.01 | 0.01  | 0.01  | -0.03 | 0.09  | 0.16  | -0.16 | 0.05  | -0.09 |
| 15 | -0.01 | 0.03  | 0.00  | 0.00  | 0.02  | 0.07  | -0.20 | 0.01  | -0.08 | 0.04  |
| 16 | 0.00  | 0.00  | 0.01  | 0.01  | -0.02 | -0.10 | 0.06  | -0.04 | 0.19  | -0.01 |
| 17 | 0.00  | 0.01  | 0.00  | 0.00  | 0.01  | 0.06  | -0.02 | 0.06  | -0.28 | -0.05 |
| 18 | 0.00  | 0.00  | 0.01  | 0.01  | -0.01 | -0.09 | 0.00  | -0.01 | 0.15  | 0.23  |
| 19 | -0.01 | -0.06 | 0.06  | 0.21  | -0.27 | -0.04 | -0.01 | 0.03  | 0.03  | 0.04  |
| 20 | 0.00  | 0.09  | 0.11  | -0.21 | 0.16  | 0.03  | 0.01  | -0.02 | -0.01 | -0.01 |
| 21 | 0.01  | -0.03 | -0.27 | 0.14  | -0.01 | -0.01 | 0.04  | 0.06  | 0.05  | 0.04  |
| 22 | -0.01 | -0.01 | -0.01 | 0.02  | -0.01 | 0.00  | 0.00  | 0.00  | 0.00  | 0.00  |
| 23 | 0.02  | -0.08 | -0.02 | 0.02  | 0.06  | 0.08  | 0.07  | 0.00  | 0.03  | -0.01 |
| 24 | -0.02 | 0.13  | 0.01  | -0.03 | -0.01 | -0.03 | -0.03 | 0.00  | -0.01 | 0.01  |
| 25 | 0.01  | -0.12 | 0.01  | 0.05  | 0.00  | 0.03  | 0.08  | 0.02  | 0.04  | 0.00  |
| 26 | 0.00  | -0.01 | 0.00  | 0.00  | 0.00  | 0.00  | 0.00  | 0.00  | 0.00  | 0.00  |
| 27 | 0.00  | 0.00  | 0.01  | 0.01  | 0.00  | -0.02 | -0.01 | 0.02  | 0.00  | 0.00  |
| 28 | -0.01 | 0.00  | 0.00  | 0.00  | 0.00  | 0.00  | 0.00  | 0.00  | 0.00  | 0.00  |
| 29 | 0.00  | 0.00  | 0.00  | 0.00  | 0.02  | 0.01  | 0.00  | 0.03  | 0.01  | 0.01  |
| 30 | -0.01 | 0.00  | 0.00  | 0.00  | 0.00  | 0.04  | 0.05  | 0.03  | 0.00  | 0.01  |
| 31 | 0.01  | 0.00  | 0.01  | 0.01  | -0.01 | -0.03 | -0.01 | -0.01 | 0.00  | 0.00  |
| 32 | -0.01 | 0.00  | 0.00  | 0.00  | 0.00  | -0.01 | 0.00  | -0.01 | 0.00  | 0.00  |
| 33 | -0.01 | 0.00  | 0.00  | 0.00  | 0.00  | -0.01 | 0.03  | 0.01  | 0.00  | -0.01 |
| 34 | 0.02  | 0.00  | 0.00  | 0.00  | 0.03  | 0.04  | 0.00  | 0.02  | 0.01  | 0.01  |
| 35 | -0.01 | 0.00  | 0.00  | 0.00  | 0.01  | 0.00  | 0.00  | 0.00  | 0.00  | 0.00  |
| 36 | 0.00  | 0.00  | 0.00  | 0.00  | 0.00  | 0.01  | 0.00  | 0.00  | 0.00  | 0.00  |
| 37 | -0.01 | 0.00  | 0.00  | 0.00  | -0.01 | -0.01 | -0.01 | 0.00  | 0.00  | 0.00  |
| 38 | 0.00  | 0.00  | 0.00  | 0.00  | -0.03 | -0.02 | -0.01 | -0.02 | 0.00  | 0.00  |

Table S9. Interfragment charge transfer (IFCT) and the redistributed IFCT (in units of  $e$ ) among molecular fragments (pyrene, naphthalene, and four substituents a–d) of compounds 1-*H-PP*, B-1-*PP*, B-2-*PP*, B-3-*PP*, B-4-*PP*, B-5-*PP*, B-6-*PP*, B-7-*PP*, B-8-*PP* and B-9-*PP* during the  $D_0 \rightarrow D_1$  excitation.

|                                         |                       | 1- <i>H-PP</i> | B-1- <i>PP</i> | B-2- <i>PP</i> | B-3- <i>PP</i> | B-4- <i>PP</i> | B-5- <i>PP</i> | B-6- <i>PP</i> | B-7- <i>PP</i> | B-8- <i>PP</i> | B-9- <i>PP</i> |
|-----------------------------------------|-----------------------|----------------|----------------|----------------|----------------|----------------|----------------|----------------|----------------|----------------|----------------|
| Interfragment charge transfer           | pyrene                | -0.18          | 0.14           | 0.16           | 0.04           | 0.02           | -0.24          | -0.42          | -0.18          | -0.34          | -0.23          |
|                                         | naphthalene           | 0.16           | -0.11          | -0.14          | -0.06          | -0.01          | 0.23           | 0.39           | 0.30           | 0.33           | 0.23           |
|                                         | a                     | 0.00           | -0.01          | -0.01          | 0.02           | -0.01          | 0.00           | 0.00           | 0.00           | 0.00           | 0.00           |
|                                         | b                     | 0.00           | -0.02          | 0.00           | 0.00           | 0.00           | 0.00           | 0.00           | 0.00           | 0.00           | 0.00           |
|                                         | c                     | 0.02           | 0.00           | -0.01          | -0.01          | 0.01           | 0.05           | 0.01           | -0.10          | 0.00           | 0.01           |
|                                         | d                     | 0.00           | -0.01          | 0.00           | 0.00           | -0.01          | -0.03          | 0.02           | -0.02          | 0.01           | 0.00           |
| Transferred electrons between fragments | pyrene -> naphthalene | 0.16           | -0.11          | -0.13          | -0.05          | -0.01          | 0.23           | 0.39           | -0.04          | 0.21           | 0.33           |
|                                         | pyrene -> a           | 0.00           | -0.01          | -0.01          | 0.02           | -0.01          | 0.00           | 0.00           | 0.00           | 0.00           | 0.00           |
|                                         | pyrene -> b           | 0.00           | -0.02          | 0.00           | 0.00           | 0.00           | 0.00           | 0.00           | 0.00           | 0.00           | 0.00           |
|                                         | pyrene -> c           | 0.01           | 0.00           | -0.01          | -0.01          | 0.01           | 0.02           | 0.01           | 0.00           | -0.03          | 0.00           |
|                                         | pyrene -> d           | 0.00           | -0.01          | 0.00           | 0.00           | -0.01          | -0.01          | 0.02           | 0.00           | -0.01          | 0.01           |
|                                         | naphthalene->a        | 0.00           | 0.00           | 0.00           | 0.00           | 0.00           | 0.00           | 0.00           | 0.00           | 0.00           | 0.00           |
|                                         | naphthalene->b        | 0.00           | 0.00           | 0.00           | 0.00           | 0.00           | 0.00           | 0.00           | 0.00           | 0.00           | 0.00           |
|                                         | naphthalene->c        | 0.01           | 0.00           | 0.00           | 0.00           | 0.00           | 0.02           | 0.00           | 0.00           | -0.07          | 0.00           |
|                                         | naphthalene->d        | -0.01          | 0.00           | 0.00           | 0.00           | 0.00           | -0.02          | 0.00           | -0.01          | -0.02          | 0.01           |
|                                         | a-> b                 | 0.00           | 0.00           | 0.00           | 0.00           | 0.00           | 0.00           | 0.00           | 0.00           | 0.00           | 0.00           |
|                                         | a-> c                 | 0.00           | 0.00           | 0.00           | 0.00           | 0.00           | 0.00           | 0.00           | 0.00           | 0.00           | 0.00           |
|                                         | a-> d                 | 0.00           | 0.00           | 0.00           | 0.00           | 0.00           | 0.00           | 0.00           | 0.00           | 0.00           | 0.00           |
|                                         | b-> c                 | 0.00           | 0.00           | 0.00           | 0.00           | 0.00           | 0.00           | 0.00           | 0.00           | 0.00           | 0.00           |
|                                         | b-> d                 | 0.00           | 0.00           | 0.00           | 0.00           | 0.00           | 0.00           | 0.00           | 0.00           | 0.00           | 0.00           |

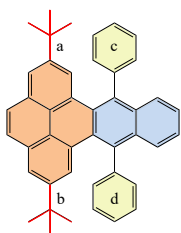

Table S10. The  $D$ -index,  $Sr$ -index,  $H$ -index, and  $t$ -index for compounds B-1-PP, B-2-PP, B-3-PP, B-4-PP, B-5-PP, B-6-PP, B-7-PP, B-8-PP, and B-9-PP.

|                   | 1-H-PP | B-1-PP | B-2-PP | B-3-PP | B-4-PP | B-5-PP | B-6-PP | B-7-PP | B-8-PP | B-9-PP |
|-------------------|--------|--------|--------|--------|--------|--------|--------|--------|--------|--------|
| $D(\text{\AA})$   | 0.94   | 1.63   | 0.83   | 0.20   | 1.03   | 1.66   | 1.45   | 0.55   | 1.81   | 1.24   |
| $Sr(\text{a.u.})$ | 0.89   | 0.63   | 0.70   | 0.68   | 0.70   | 0.66   | 0.72   | 0.68   | 0.70   | 0.68   |
| $H(\text{\AA})$   | 3.59   | 3.01   | 3.03   | 3.04   | 3.08   | 3.11   | 3.16   | 3.06   | 3.29   | 3.17   |
| $t(\text{\AA})$   | -1.66  | -0.26  | -1.10  | -1.80  | -1.20  | -0.32  | -0.85  | -1.46  | -0.92  | -1.24  |

Table S11. Atomic spin populations in the first excited state for compounds B-1-PP, B-2-PP, B-3-PP, B-4-PP, B-5-PP, B-6-PP, B-7-PP, B-8-PP, and B-9-PP.

|    | B-1-PP | B-2-PP | B-3-PP | B-4-PP | B-5-PP | B-6-PP | B-7-PP | B-8-PP | B-9-PP |
|----|--------|--------|--------|--------|--------|--------|--------|--------|--------|
| 1  | 0.18   | -0.05  | -0.14  | 0.07   | 0.01   | 0.02   | -0.03  | 0.01   | -0.01  |
| 2  | -0.03  | 0.19   | 0.32   | -0.14  | -0.02  | -0.05  | 0.03   | -0.01  | 0.02   |
| 3  | -0.01  | 0.26   | 0.20   | 0.17   | 0.02   | 0.08   | -0.04  | 0.02   | -0.02  |
| 4  | 0.02   | -0.18  | 0.15   | 0.18   | -0.04  | -0.09  | 0.04   | -0.03  | 0.03   |
| 5  | -0.01  | 0.04   | -0.05  | -0.04  | 0.15   | 0.34   | -0.15  | 0.12   | -0.11  |
| 6  | 0.01   | -0.03  | 0.07   | 0.06   | 0.58   | 0.17   | 0.29   | -0.02  | 0.25   |
| 7  | -0.01  | 0.02   | -0.02  | -0.02  | -0.18  | 0.08   | 0.19   | 0.06   | -0.20  |
| 8  | 0.01   | -0.01  | 0.02   | 0.02   | 0.20   | -0.03  | -0.03  | 0.19   | 0.57   |
| 9  | -0.01  | 0.01   | -0.01  | -0.01  | -0.10  | 0.10   | 0.07   | 0.40   | 0.19   |
| 10 | 0.60   | 0.10   | 0.26   | -0.05  | -0.01  | -0.02  | 0.02   | -0.01  | 0.01   |
| 11 | -0.19  | 0.03   | -0.03  | 0.08   | 0.00   | 0.03   | -0.06  | 0.01   | -0.03  |
| 12 | 0.15   | -0.08  | -0.02  | -0.05  | 0.00   | -0.03  | 0.09   | -0.01  | 0.05   |
| 13 | -0.10  | 0.10   | 0.04   | 0.05   | -0.01  | 0.05   | -0.11  | 0.02   | -0.05  |
| 14 | 0.02   | -0.03  | 0.01   | 0.01   | 0.03   | -0.19  | 0.41   | -0.06  | 0.21   |
| 15 | -0.02  | 0.03   | -0.01  | 0.00   | 0.00   | 0.49   | -0.07  | 0.16   | -0.08  |
| 16 | 0.01   | -0.02  | 0.02   | 0.02   | 0.17   | -0.11  | 0.14   | -0.14  | 0.14   |
| 17 | -0.01  | 0.01   | -0.01  | -0.01  | -0.09  | 0.11   | -0.03  | 0.52   | 0.04   |
| 18 | 0.00   | -0.01  | 0.02   | 0.02   | 0.20   | -0.04  | 0.06   | -0.20  | -0.01  |
| 19 | 0.04   | 0.23   | -0.18  | 0.54   | 0.05   | 0.11   | -0.03  | 0.03   | -0.02  |
| 20 | 0.00   | -0.14  | 0.37   | -0.19  | -0.03  | -0.06  | 0.03   | -0.02  | 0.02   |
| 21 | 0.03   | 0.53   | -0.09  | 0.32   | 0.06   | 0.12   | -0.03  | 0.03   | -0.02  |
| 22 | 0.00   | 0.00   | -0.03  | 0.01   | 0.00   | 0.00   | 0.00   | 0.00   | 0.00   |
| 23 | 0.25   | 0.00   | 0.04   | -0.05  | 0.01   | -0.04  | 0.15   | -0.01  | 0.06   |
| 24 | -0.12  | 0.07   | 0.02   | 0.07   | 0.00   | 0.03   | -0.07  | 0.01   | -0.03  |
| 25 | 0.25   | -0.03  | 0.02   | -0.02  | 0.01   | -0.04  | 0.14   | -0.01  | 0.06   |
| 26 | 0.01   | -0.01  | 0.00   | 0.00   | 0.00   | 0.00   | 0.00   | 0.00   | 0.00   |
| 27 | 0.00   | 0.00   | 0.00   | 0.00   | 0.04   | 0.01   | 0.02   | 0.00   | 0.01   |
| 28 | 0.00   | 0.00   | 0.00   | 0.00   | -0.02  | 0.00   | -0.01  | 0.00   | 0.00   |
| 29 | 0.00   | 0.00   | 0.00   | 0.00   | 0.05   | 0.01   | 0.03   | 0.00   | 0.01   |
| 30 | 0.00   | 0.00   | -0.01  | 0.00   | -0.08  | -0.02  | -0.05  | 0.00   | -0.03  |
| 31 | 0.00   | 0.00   | 0.00   | 0.00   | 0.04   | 0.01   | 0.03   | 0.00   | 0.01   |
| 32 | 0.00   | 0.00   | 0.00   | 0.00   | -0.02  | 0.00   | -0.01  | 0.00   | -0.01  |
| 33 | 0.00   | 0.00   | 0.00   | 0.00   | 0.00   | -0.06  | 0.01   | -0.02  | 0.01   |
| 34 | 0.00   | 0.00   | 0.00   | 0.00   | 0.00   | 0.03   | 0.00   | 0.01   | 0.00   |
| 35 | 0.00   | 0.00   | 0.00   | 0.00   | 0.00   | -0.01  | 0.00   | 0.00   | 0.00   |
| 36 | 0.00   | 0.00   | 0.00   | 0.00   | 0.00   | 0.02   | 0.00   | 0.01   | 0.00   |
| 37 | 0.00   | 0.00   | 0.00   | 0.00   | 0.00   | -0.01  | 0.00   | 0.00   | 0.00   |
| 38 | 0.00   | 0.00   | 0.00   | 0.00   | 0.00   | 0.03   | 0.00   | 0.01   | -0.01  |

Table S12. Atomic spin populations in the ground state for compounds B-1-PP, B-2-PP, B-3-PP, B-4-PP, B-5-PP, B-6-PP, B-7-PP, B-8-PP, and B-9-PP.

|    | B-1-PP | B-2-PP | B-3-PP | B-4-PP | B-5-PP | B-6-PP | B-7-PP | B-8-PP | B-9-PP |
|----|--------|--------|--------|--------|--------|--------|--------|--------|--------|
| 1  | 0.18   | -0.05  | -0.14  | 0.07   | 0.01   | 0.02   | -0.03  | 0.01   | -0.01  |
| 2  | -0.03  | 0.19   | 0.32   | -0.14  | -0.02  | -0.05  | 0.03   | -0.01  | 0.02   |
| 3  | -0.01  | 0.26   | 0.20   | 0.17   | 0.02   | 0.08   | -0.04  | 0.02   | -0.02  |
| 4  | 0.02   | -0.18  | 0.15   | 0.18   | -0.04  | -0.09  | 0.04   | -0.03  | 0.03   |
| 5  | -0.01  | 0.04   | -0.05  | -0.04  | 0.15   | 0.34   | -0.15  | 0.12   | -0.11  |
| 6  | 0.01   | -0.03  | 0.07   | 0.06   | 0.58   | 0.17   | 0.29   | -0.02  | 0.25   |
| 7  | -0.01  | 0.02   | -0.02  | -0.02  | -0.18  | 0.08   | 0.19   | 0.06   | -0.20  |
| 8  | 0.01   | -0.01  | 0.02   | 0.02   | 0.20   | -0.03  | -0.03  | 0.19   | 0.57   |
| 9  | -0.01  | 0.01   | -0.01  | -0.01  | -0.10  | 0.10   | 0.07   | 0.40   | 0.19   |
| 10 | 0.60   | 0.10   | 0.26   | -0.05  | -0.01  | -0.02  | 0.02   | -0.01  | 0.01   |
| 11 | -0.19  | 0.03   | -0.03  | 0.08   | 0.00   | 0.03   | -0.06  | 0.01   | -0.03  |
| 12 | 0.15   | -0.08  | -0.02  | -0.05  | 0.00   | -0.03  | 0.09   | -0.01  | 0.05   |
| 13 | -0.10  | 0.10   | 0.04   | 0.05   | -0.01  | 0.05   | -0.11  | 0.02   | -0.05  |
| 14 | 0.02   | -0.03  | 0.01   | 0.01   | 0.03   | -0.19  | 0.41   | -0.06  | 0.21   |
| 15 | -0.02  | 0.03   | -0.01  | 0.00   | 0.00   | 0.49   | -0.07  | 0.16   | -0.08  |
| 16 | 0.01   | -0.02  | 0.02   | 0.02   | 0.17   | -0.11  | 0.14   | -0.14  | 0.14   |
| 17 | -0.01  | 0.01   | -0.01  | -0.01  | -0.09  | 0.11   | -0.03  | 0.52   | 0.04   |
| 18 | 0.00   | -0.01  | 0.02   | 0.02   | 0.20   | -0.04  | 0.06   | -0.20  | -0.01  |
| 19 | 0.04   | 0.23   | -0.18  | 0.54   | 0.05   | 0.11   | -0.03  | 0.03   | -0.02  |
| 20 | 0.00   | -0.14  | 0.37   | -0.19  | -0.03  | -0.06  | 0.03   | -0.02  | 0.02   |
| 21 | 0.03   | 0.53   | -0.09  | 0.32   | 0.06   | 0.12   | -0.03  | 0.03   | -0.02  |
| 22 | 0.00   | 0.00   | -0.03  | 0.01   | 0.00   | 0.00   | 0.00   | 0.00   | 0.00   |
| 23 | 0.25   | 0.00   | 0.04   | -0.05  | 0.01   | -0.04  | 0.15   | -0.01  | 0.06   |
| 24 | -0.12  | 0.07   | 0.02   | 0.07   | 0.00   | 0.03   | -0.07  | 0.01   | -0.03  |
| 25 | 0.25   | -0.03  | 0.02   | -0.02  | 0.01   | -0.04  | 0.14   | -0.01  | 0.06   |
| 26 | 0.01   | -0.01  | 0.00   | 0.00   | 0.00   | 0.00   | 0.00   | 0.00   | 0.00   |
| 27 | 0.00   | 0.00   | 0.00   | 0.00   | 0.04   | 0.01   | 0.02   | 0.00   | 0.01   |
| 28 | 0.00   | 0.00   | 0.00   | 0.00   | -0.02  | 0.00   | -0.01  | 0.00   | 0.00   |
| 29 | 0.00   | 0.00   | 0.00   | 0.00   | 0.05   | 0.01   | 0.03   | 0.00   | 0.01   |
| 30 | 0.00   | 0.00   | -0.01  | 0.00   | -0.08  | -0.02  | -0.05  | 0.00   | -0.03  |
| 31 | 0.00   | 0.00   | 0.00   | 0.00   | 0.04   | 0.01   | 0.03   | 0.00   | 0.01   |
| 32 | 0.00   | 0.00   | 0.00   | 0.00   | -0.02  | 0.00   | -0.01  | 0.00   | -0.01  |
| 33 | 0.00   | 0.00   | 0.00   | 0.00   | 0.00   | -0.06  | 0.01   | -0.02  | 0.01   |
| 34 | 0.00   | 0.00   | 0.00   | 0.00   | 0.00   | 0.03   | 0.00   | 0.01   | 0.00   |
| 35 | 0.00   | 0.00   | 0.00   | 0.00   | 0.00   | -0.01  | 0.00   | 0.00   | 0.00   |
| 36 | 0.00   | 0.00   | 0.00   | 0.00   | 0.00   | 0.02   | 0.00   | 0.01   | 0.00   |
| 37 | 0.00   | 0.00   | 0.00   | 0.00   | 0.00   | -0.01  | 0.00   | 0.00   | 0.00   |
| 38 | 0.00   | 0.00   | 0.00   | 0.00   | 0.00   | 0.03   | 0.00   | 0.01   | -0.01  |

Table S13. Excitation energy, wavelength, oscillator strength, and dominant orbital transitions contributions of the  $D_1 \rightarrow D_0$  emission transition for compounds B-1-PP, B-2-PP, B-3-PP, B-4-PP, B-5-PP, B-6-PP, B-7-PP, B-8-PP, and B-9-PP.

| Compounds | Excitation energy (eV) | Wavelength h (nm) | Oscillator strength | Dominant orbital transitions contributions |
|-----------|------------------------|-------------------|---------------------|--------------------------------------------|
| B-1-PP    | 1.23                   | 1010.74           | 0.0094              | H-1→S 20.45%<br>H→S 70.68%                 |
| B-2-PP    | 0.61                   | 2033.11           | 0.0065              | H-1→S 11.40%<br>H→S 82.11%                 |
| B-3-PP    | 0.51                   | 2444.29           | 0.0134              | H→S 94.89%                                 |
| B-4-PP    | 0.88                   | 1404.69           | 0.0062              | H-1→S 17.57%<br>H→S 74.64%                 |
| B-5-PP    | 0.40                   | 3080.78           | 0.012               | H→S 92.69%                                 |
| B-6-PP    | 1.15                   | 1074.54           | 0.0289              | H→S 86.95%                                 |
| B-7-PP    | 1.22                   | 1012.83           | 0.0503              | H-1→S 72.32%<br>H→S 10.48%                 |
| B-8-PP    | 1.30                   | 953.72            | 0.022               | H-3→S 25.66%<br>H→S 65.33%                 |
| B-9-PP    | 0.84                   | 1469.82           | 0.0034              | H→S 75.37%                                 |

H represents HOMO, S represents SOMO.

Table S14. Excitation energy, wavelength, oscillator strength, and dominant orbital transitions contributions of the  $D_0 \rightarrow D_1$  absorption transition for the optimized *PP*, *MM*, *PM* and *MP* stereoisomers of B-1 B-2, B-3, B-4, B-5, B-6, B-7, B-8, and B-9.

| Compounds      | Excitation energy/eV | Wavelength /nm | Oscillator strength | Dominant orbital transitions contributions |              |
|----------------|----------------------|----------------|---------------------|--------------------------------------------|--------------|
| B-1            | B-1- <i>PP</i>       | 1.8731         | 661.91              | 0.0078                                     | H-2→S 17.44% |
|                |                      |                |                     |                                            | H-1→S 23.05% |
|                |                      |                |                     |                                            | H→S 53.76%   |
|                |                      |                |                     |                                            | H-2→S 17.44% |
| B-1- <i>MM</i> | 1.8733               | 661.86         | 0.0078              | H-1→S 23.06%                               |              |
|                |                      |                |                     | H→S 53.75%                                 |              |
|                |                      |                |                     | H-2→S 10.01%                               |              |
|                |                      |                |                     | H-2→S 10.01%                               |              |
| B-1- <i>MP</i> | 1.8501               | 670.13         | 0.0095              | H-1→S 21.30%                               |              |
|                |                      |                |                     | H→S 62.93%                                 |              |
|                |                      |                |                     | H-2→S 10.01%                               |              |
|                |                      |                |                     | H-2→S 10.01%                               |              |
| B-1- <i>PM</i> | 1.8502               | 670.11         | 0.0095              | H-1→S 21.30%                               |              |
|                |                      |                |                     | H→S 62.93%                                 |              |
|                |                      |                |                     | H-1→S 23.68%                               |              |
|                |                      |                |                     | H→S 66.54%                                 |              |
| B-2            | B-2- <i>PP</i>       | 1.2116         | 1023.32             | 0.0110                                     | H-1→S 23.68% |
|                |                      |                |                     |                                            | H→S 66.55%   |
|                |                      |                |                     |                                            | H-1→S 17.27% |
|                |                      |                |                     |                                            | H→S 73.59%   |
| B-2- <i>MM</i> | 1.2116               | 1023.27        | 0.0112              | H-1→S 15.72%                               |              |
|                |                      |                |                     | H→S 74.86%                                 |              |
|                |                      |                |                     | H-1→S 15.72%                               |              |
|                |                      |                |                     | H→S 74.86%                                 |              |
| B-2- <i>MP</i> | 1.1908               | 1041.19        | 0.0114              | H-1→S 15.72%                               |              |
|                |                      |                |                     | H→S 74.86%                                 |              |
|                |                      |                |                     | H-1→S 15.72%                               |              |
|                |                      |                |                     | H→S 74.86%                                 |              |
| B-2- <i>PM</i> | 1.1908               | 1041.17        | 0.0114              | H-1→S 15.72%                               |              |
|                |                      |                |                     | H→S 74.86%                                 |              |
|                |                      |                |                     | H-1→S 15.72%                               |              |
|                |                      |                |                     | H→S 74.86%                                 |              |
| B-3            | B-3- <i>PP</i>       | 1.0792         | 1148.87             | 0.0169                                     | H→S 84.39%   |
|                |                      |                |                     |                                            | H→S 84.38%   |
|                |                      |                |                     |                                            | H→S 92.2%    |
|                |                      |                |                     |                                            | H→S 92.2%    |
| B-3- <i>MM</i> | 1.079                | 1149.09        | 0.0169              | H→S 92.2%                                  |              |
|                |                      |                |                     | H→S 92.2%                                  |              |
|                |                      |                |                     | H→S 92.2%                                  |              |
|                |                      |                |                     | H→S 92.2%                                  |              |
| B-3- <i>MP</i> | 1.0972               | 1130.01        | 0.015               | H→S 92.2%                                  |              |
|                |                      |                |                     | H→S 92.2%                                  |              |
|                |                      |                |                     | H→S 92.2%                                  |              |
|                |                      |                |                     | H→S 92.2%                                  |              |
| B-3- <i>PM</i> | 1.0972               | 1130.00        | 0.015               | H→S 92.2%                                  |              |
|                |                      |                |                     | H→S 92.2%                                  |              |
|                |                      |                |                     | H→S 92.2%                                  |              |
|                |                      |                |                     | H→S 92.2%                                  |              |
| B-4            | B-4- <i>PP</i>       | 1.3934         | 889.77              | 0.0051                                     | H-1→S 24.86% |
|                |                      |                |                     |                                            | H→S 63.06%   |
|                |                      |                |                     |                                            | H-1→S 24.87% |
|                |                      |                |                     |                                            | H→S 63.05%   |
| B-4- <i>MM</i> | 1.3935               | 889.76         | 0.0051              | H→S 63.05%                                 |              |
|                |                      |                |                     | H→S 63.05%                                 |              |
|                |                      |                |                     | H→S 63.05%                                 |              |
|                |                      |                |                     | H→S 63.05%                                 |              |
| B-4- <i>MP</i> | -                    | -              | -                   | -                                          | -            |
|                |                      |                |                     |                                            | -            |
|                |                      |                |                     |                                            | -            |
|                |                      |                |                     |                                            | -            |
| B-4- <i>PM</i> | -                    | -              | -                   | -                                          | -            |
|                |                      |                |                     |                                            | -            |
|                |                      |                |                     |                                            | -            |
|                |                      |                |                     |                                            | -            |
| B-5            | B-5- <i>PP</i>       | 1.4764         | 839.76              | 0.0107                                     | H-2→S 13.00% |
|                |                      |                |                     |                                            | H→S 75.39%   |
|                |                      |                |                     |                                            | H-2→S 13.00% |
|                |                      |                |                     |                                            | H→S 75.39%   |
| B-5- <i>MM</i> | 1.4763               | 839.86         | 0.0108              | H→S 75.39%                                 |              |
|                |                      |                |                     | H→S 75.39%                                 |              |
|                |                      |                |                     | H→S 75.39%                                 |              |
|                |                      |                |                     | H→S 75.39%                                 |              |

---

|     |                |        |         |        |                                            |
|-----|----------------|--------|---------|--------|--------------------------------------------|
|     | B-5- <i>MP</i> | -      | -       | -      | -                                          |
|     | B-5- <i>PM</i> | -      | -       | -      | -                                          |
|     | B-6- <i>PP</i> | 1.5608 | 794.39  | 0.0343 | H→S 83.99%                                 |
| B-6 | B-6- <i>MM</i> | 1.5607 | 794.42  | 0.0343 | H→S 83.99%                                 |
|     | B-6- <i>MP</i> | 1.6154 | 767.53  | 0.0385 | H→S 85.37%                                 |
|     | B-6- <i>PM</i> | 1.6154 | 767.53  | 0.0385 | H→S 85.37%                                 |
|     | B-7- <i>PP</i> | 0.8557 | 1448.96 | 0.0009 | H-1→S 11.76%<br>H→S 81.13%                 |
| B-7 | B-7- <i>MM</i> | 0.8555 | 1449.25 | 0.0009 | H-1→S 11.75%<br>H→S 81.14%                 |
|     | B-7- <i>MP</i> | 0.8138 | 1523.47 | 0.0016 | H-1→S 13.80%<br>H→S 77.69%                 |
|     | B-7- <i>PM</i> | 0.8137 | 1523.71 | 0.0016 | H-1→S 13.78%<br>H→S 77.71%                 |
|     | B-8- <i>PP</i> | 1.8851 | 657.72  | 0.0194 | H-3→S 25.04%<br>H→S 61.45%                 |
| B-8 | B-8- <i>MM</i> | 1.8852 | 657.69  | 0.0194 | H-3→S 25.05%<br>H→S 61.4%                  |
|     | B-8- <i>MP</i> | 1.9699 | 629.39  | 0.0224 | H-3→S 25.38%<br>H→S 59.50%                 |
|     | B-8- <i>PM</i> | 1.9699 | 629.4   | 0.0224 | H-3→S 25.38%<br>H→S 59.51%                 |
|     | B-9- <i>PP</i> | 1.6206 | 765.04  | 0.0059 | H-3→S 10.62%<br>H-2→S 11.57%<br>H→S 63.15% |
| B-9 | B-9- <i>MM</i> | 1.6208 | 764.97  | 0.006  | H-3→S 10.62%<br>H-2→S 11.57%<br>H→S 63.15% |
|     | B-9- <i>MP</i> | 1.6841 | 736.22  | 0.0055 | H-3→S 12.33%<br>H-2→S 16.08%<br>H→S 59.90% |
|     | B-9- <i>PM</i> | 1.6841 | 736.19  | 0.0055 | H-3→S 12.33%<br>H-2→S 16.08%<br>H→S 59.90% |

---

Table S15. The transition magnetic dipole moment  $m$ , transition electric dipole moment  $\mu$ , their angle  $\theta$ , and the dissymmetry factor for boron at various positions and conformations for the  $D_0 \rightarrow D_1$  transition.

| Compounds | $ m $<br>( $10^{-20}$ erg·G $^{-1}$ ) | $ \mu $<br>( $10^{-18}$ esu·cm) | $\theta$<br>(deg) | $ g_{\text{abs}} $<br>( $10^{-3}$ ) |
|-----------|---------------------------------------|---------------------------------|-------------------|-------------------------------------|
| 1-H-MM    | 0.29                                  | 1.67                            | 77.72             | 1.48                                |
| 1-H-PM/MP | 0.13                                  | 0.80                            | 73.97             | 1.82                                |
| B-1-MM    | 0.77                                  | 1.05                            | 92.47             | 1.27                                |
| B-1-MP    | 0.79                                  | 1.16                            | 88.38             | 0.77                                |
| B-1-PM    | 0.79                                  | 1.16                            | 91.62             | 0.77                                |
| B-2-MM    | 0.90                                  | 1.56                            | 96.71             | 2.71                                |
| B-2-MP    | 0.94                                  | 1.59                            | 97.58             | 3.10                                |
| B-2-PM    | 0.94                                  | 1.59                            | 82.43             | 3.10                                |
| B-3-MM    | 1.37                                  | 2.03                            | 92.01             | 0.95                                |
| B-3-MP    | 1.35                                  | 1.90                            | 80.14             | 4.87                                |
| B-3-PM    | 1.35                                  | 1.90                            | 99.86             | 4.87                                |
| B-4-MM    | 1.13                                  | 0.98                            | 85.72             | 3.43                                |
| B-4-MP    | -                                     | -                               | -                 | -                                   |
| B-4-PM    | -                                     | -                               | -                 | -                                   |
| B-5-MM    | 0.93                                  | 1.39                            | 90.22             | 0.10                                |
| B-5-MP    | -                                     | -                               | -                 | -                                   |
| B-5-PM    | -                                     | -                               | -                 | -                                   |
| B-6-MM    | 0.45                                  | 2.41                            | 101.01            | 1.43                                |
| B-6-MP    | 0.44                                  | 2.51                            | 90.00             | 0.00                                |
| B-6-PM    | 0.44                                  | 2.51                            | 90.00             | 0.00                                |
| B-7-MM    | 0.98                                  | 0.53                            | 92.12             | 2.72                                |
| B-7-MP    | 0.98                                  | 0.72                            | 65.15             | 22.72                               |
| B-7-PM    | 0.98                                  | 0.72                            | 114.74            | 22.62                               |
| B-8-MM    | 0.66                                  | 1.65                            | 108.05            | 4.98                                |
| B-8-MP    | 0.73                                  | 1.73                            | 90.2              | 5.86                                |
| B-8-PM    | 0.73                                  | 1.73                            | 89.8              | 5.86                                |
| B-9-MM    | 0.70                                  | 0.98                            | 106.88            | 8.19                                |
| B-9-MP    | 0.78                                  | 0.93                            | 85.24             | 2.78                                |
| B-9-PM    | 0.78                                  | 0.93                            | 94.76             | 2.78                                |

Table S16. The relative Gibbs free energy ( $\Delta G$ , 298.15K) with respect to the energy of the boron embedding compounds at the 6th position, UV-Vis absorption peak, oscillator strength ( $f$ ), and  $|g_{\text{abs}}|$  of B-embedded systems in the pyrene anthracene, pyrene tetracene, and pyrene pentacene conjugated frameworks at the 4th, 5th, and 6th positions.

| Compounds              |     | $\Delta G$ (kcal·mol <sup>-1</sup> ) | UV-vis peak (nm)                            | oscillator strength $f$                          | $ g_{\text{abs}} $ (10 <sup>-3</sup> ) |
|------------------------|-----|--------------------------------------|---------------------------------------------|--------------------------------------------------|----------------------------------------|
| Pyrene and naphthalene | B-4 | 9.65                                 | 890                                         | 0.0051                                           | 3.43                                   |
|                        | B-5 | 6.41                                 | 840                                         | 0.0107                                           | 0.11                                   |
|                        | B-6 | 0.00                                 | 794                                         | 0.0343                                           | 1.43                                   |
| pyrene anthracene      | B-4 | 13.53                                | 888                                         | 0.0097                                           | 3.08                                   |
|                        | B-5 | 5.71                                 | 762                                         | 0.2050                                           | 0.94                                   |
|                        | B-6 | 0.00                                 | 740                                         | 0.0433                                           | 1.44                                   |
| pyrene tetracene       | B-4 | 15.74                                | 895                                         | 0.0191                                           | 2.45                                   |
|                        | B-5 | 4.54                                 | 739                                         | 0.0473                                           | 0.75                                   |
|                        | B-6 | 0.00                                 | 750                                         | 0.0319                                           | 1.95                                   |
| pyrene pentacene       | B-4 | 17.16                                | D <sub>1</sub> :1213<br>D <sub>2</sub> :901 | D <sub>1</sub> :0.0010<br>D <sub>2</sub> :0.0305 | 1.53                                   |
|                        | B-5 | 4.44                                 | 796                                         | 0.0075                                           | 1.66                                   |
|                        | B-6 | 0.00                                 | D <sub>1</sub> :894<br>D <sub>2</sub> :695  | D <sub>1</sub> :0.0035<br>D <sub>2</sub> :0.1219 | 1.05                                   |

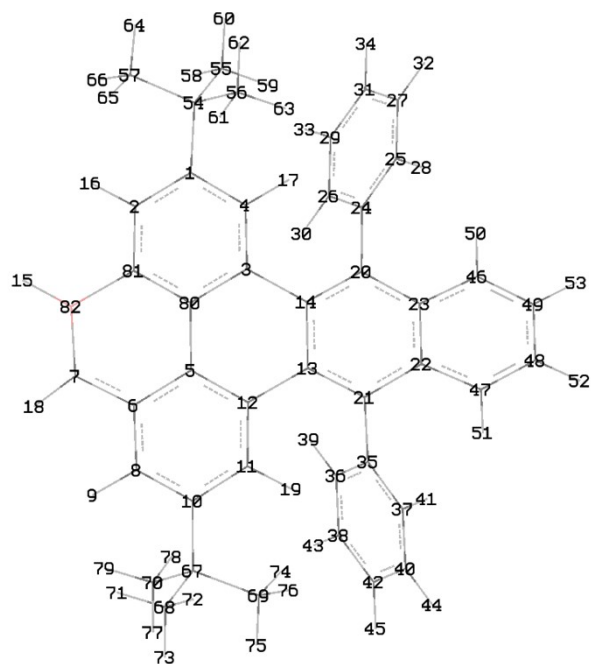

Table S17. Deviations in bond lengths and angles of B-1-*MM*, B-1-*MP*, and B-1-*PM* isomers by comparison with the B-1-*PP* structure.

| Atom1 | Atom2 | $\Delta r_{MM-PP}$ (Å) | $\Delta r_{PM-PP}$ (Å) | $\Delta r_{MP-PP}$ (Å) | Atom1 | Atom2 | Atom3 | $\Delta A_{MM-PP}$ (°) | $\Delta A_{PM-PP}$ (°) | $\Delta A_{MP-PP}$ (°) |
|-------|-------|------------------------|------------------------|------------------------|-------|-------|-------|------------------------|------------------------|------------------------|
| 2     | 1     | 1.63E-05               | 5.62E-03               | 5.61E-03               | -     | -     | -     | -                      | -                      | -                      |
| 3     | 1     | -3.06E-05              | -5.06E-03              | -5.06E-03              | 3     | 1     | 2     | -7.17E-04              | -3.76E-01              | -3.76E-01              |
| 4     | 1     | -1.44E-05              | -2.97E-03              | -2.97E-03              | 4     | 1     | 2     | -5.35E-05              | 2.02E-03               | 2.05E-03               |
| 5     | 3     | -1.28E-05              | -7.10E-03              | -7.10E-03              | 5     | 3     | 1     | 2.13E-03               | -1.26E+00              | -1.26E+00              |
| 6     | 5     | -3.25E-05              | -1.61E-03              | -1.61E-03              | 6     | 5     | 3     | -1.57E-03              | -2.81E-01              | -2.81E-01              |
| 7     | 6     | 2.21E-05               | 5.25E-04               | 5.22E-04               | 7     | 6     | 5     | 3.99E-04               | -1.17E-01              | -1.18E-01              |
| 8     | 6     | -1.09E-05              | 6.18E-04               | 6.19E-04               | 8     | 6     | 5     | 1.31E-03               | -1.89E-01              | -1.89E-01              |

|    |    |           |           |           |    |    |    |           |           |           |
|----|----|-----------|-----------|-----------|----|----|----|-----------|-----------|-----------|
| 9  | 8  | -2.80E-06 | -8.29E-05 | -8.24E-05 | 9  | 8  | 6  | 5.34E-04  | 4.09E-02  | 4.10E-02  |
| 10 | 8  | -5.00E-06 | -6.15E-04 | -6.18E-04 | 10 | 8  | 6  | -1.30E-03 | -2.02E-01 | -2.03E-01 |
| 11 | 10 | 4.50E-06  | 2.79E-03  | 2.79E-03  | 11 | 10 | 8  | 4.51E-04  | 1.15E-02  | 1.16E-02  |
| 12 | 5  | -1.90E-06 | 1.52E-03  | 1.53E-03  | 12 | 5  | 3  | 8.66E-04  | -7.86E-01 | -7.86E-01 |
| 13 | 12 | 3.45E-05  | -4.26E-04 | -4.31E-04 | 13 | 12 | 5  | -1.87E-04 | -1.34E+00 | -1.34E+00 |
| 14 | 13 | -1.69E-05 | 7.89E-03  | 7.89E-03  | 14 | 13 | 12 | -1.10E-05 | 8.60E-01  | 8.60E-01  |
| 15 | 7  | -5.40E-06 | 2.13E-03  | 2.13E-03  | 15 | 7  | 6  | 2.26E-04  | -2.67E-01 | -2.67E-01 |
| 16 | 2  | -6.90E-06 | 2.12E-03  | 2.12E-03  | 16 | 2  | 1  | 3.30E-04  | -5.05E-01 | -5.05E-01 |
| 17 | 4  | 4.70E-06  | -1.60E-03 | -1.60E-03 | 17 | 4  | 1  | 2.83E-04  | 8.66E-01  | 8.66E-01  |
| 18 | 7  | -3.30E-06 | 9.20E-06  | 1.06E-05  | 18 | 7  | 6  | 6.11E-04  | 8.74E-02  | 8.68E-02  |
| 19 | 11 | -4.10E-06 | 2.15E-04  | 2.17E-04  | 19 | 11 | 10 | -2.00E-03 | 2.20E-01  | 2.21E-01  |
| 20 | 14 | -2.72E-05 | -4.99E-04 | -4.95E-04 | 20 | 14 | 13 | 2.19E-03  | 5.88E-01  | 5.88E-01  |
| 21 | 13 | -1.32E-05 | -7.83E-04 | -7.79E-04 | 21 | 13 | 12 | 2.06E-03  | -1.75E+00 | -1.75E+00 |
| 22 | 21 | 6.80E-06  | 8.16E-04  | 8.16E-04  | 22 | 21 | 13 | 2.26E-04  | 9.84E-01  | 9.83E-01  |
| 23 | 22 | -2.61E-05 | -2.92E-03 | -2.92E-03 | 23 | 22 | 21 | 2.03E-04  | 3.67E-01  | 3.67E-01  |
| 24 | 20 | 1.15E-05  | 3.15E-03  | 3.15E-03  | 24 | 20 | 14 | -5.41E-04 | 1.13E+00  | 1.13E+00  |
| 25 | 24 | -3.13E-03 | -2.20E-03 | -4.33E-03 | 25 | 24 | 20 | -2.11E+00 | -7.28E-01 | -1.72E+00 |
| 26 | 24 | 3.11E-03  | -1.20E-03 | 9.34E-04  | 26 | 24 | 20 | 2.11E+00  | 3.95E-01  | 1.38E+00  |
| 27 | 25 | 8.95E-04  | 7.90E-04  | 1.05E-03  | 27 | 25 | 24 | -5.74E-02 | -7.17E-02 | -2.03E-01 |
| 28 | 25 | -8.12E-04 | 2.90E-06  | -6.36E-04 | 28 | 25 | 24 | -1.27E-01 | -1.93E-02 | -2.24E-02 |
| 29 | 26 | -8.94E-04 | 1.45E-04  | -1.12E-04 | 29 | 26 | 24 | 5.54E-02  | -1.47E-01 | -1.51E-02 |
| 30 | 26 | 8.06E-04  | 1.74E-04  | 8.13E-04  | 30 | 26 | 24 | 1.27E-01  | 1.04E-01  | 1.07E-01  |
| 31 | 29 | -8.00E-07 | 1.02E-03  | 1.02E-03  | 31 | 29 | 26 | -4.93E-04 | 1.68E-02  | 1.67E-02  |
| 32 | 27 | -1.50E-04 | 2.69E-05  | 7.85E-05  | 32 | 27 | 25 | -6.40E-02 | 3.42E-02  | -5.82E-02 |
| 33 | 29 | 1.46E-04  | 2.27E-04  | 1.75E-04  | 33 | 29 | 26 | 6.56E-02  | 7.13E-03  | 9.99E-02  |
| 34 | 31 | 1.30E-06  | 3.44E-05  | 3.41E-05  | 34 | 31 | 29 | -1.16E-03 | -1.40E-02 | -1.39E-02 |

|    |    |           |           |           |    |    |    |           |           |           |
|----|----|-----------|-----------|-----------|----|----|----|-----------|-----------|-----------|
| 35 | 21 | 1.91E-05  | 4.02E-03  | 4.02E-03  | 35 | 21 | 13 | 2.14E-03  | 1.27E+00  | 1.27E+00  |
| 36 | 35 | 2.18E-03  | 5.31E-04  | -1.54E-03 | 36 | 35 | 21 | 1.93E+00  | 1.37E+00  | 2.73E-01  |
| 37 | 35 | -2.20E-03 | -3.74E-03 | -1.67E-03 | 37 | 35 | 21 | -1.93E+00 | -1.66E+00 | -5.61E-01 |
| 38 | 36 | -2.31E-04 | 4.70E-04  | 7.26E-04  | 38 | 36 | 35 | 5.68E-02  | 4.98E-03  | -1.27E-01 |
| 39 | 36 | 5.38E-04  | 8.00E-04  | 1.80E-04  | 39 | 36 | 35 | 1.68E-01  | 9.58E-02  | 8.54E-02  |
| 40 | 37 | 2.32E-04  | 9.63E-04  | 7.06E-04  | 40 | 37 | 35 | -5.94E-02 | -1.85E-01 | -5.28E-02 |
| 41 | 37 | -5.43E-04 | -3.60E-04 | 2.60E-04  | 41 | 37 | 35 | -1.68E-01 | -8.22E-02 | -7.20E-02 |
| 42 | 38 | -4.00E-07 | 9.82E-05  | 9.69E-05  | 42 | 38 | 36 | -2.31E-04 | 3.51E-02  | 3.52E-02  |
| 43 | 38 | 1.29E-04  | 1.44E-04  | 2.17E-04  | 43 | 38 | 36 | 5.14E-02  | 8.29E-02  | -8.27E-03 |
| 44 | 40 | -1.32E-04 | 8.55E-05  | 1.18E-05  | 44 | 40 | 37 | -4.95E-02 | -5.94E-02 | 3.20E-02  |
| 45 | 42 | 1.30E-06  | -2.84E-05 | -2.81E-05 | 45 | 42 | 38 | -9.72E-04 | 4.17E-03  | 4.27E-03  |
| 46 | 23 | 1.43E-05  | 1.59E-03  | 1.58E-03  | 46 | 23 | 22 | 8.42E-04  | 1.74E-01  | 1.74E-01  |
| 47 | 22 | 1.86E-05  | 1.63E-03  | 1.63E-03  | 47 | 22 | 21 | 4.38E-05  | -5.83E-01 | -5.83E-01 |
| 48 | 47 | -1.73E-05 | -8.89E-04 | -8.85E-04 | 48 | 47 | 22 | -6.64E-04 | 2.21E-01  | 2.21E-01  |
| 49 | 46 | -1.78E-05 | -8.96E-04 | -8.93E-04 | 49 | 46 | 23 | -7.61E-04 | 2.20E-01  | 2.19E-01  |
| 50 | 46 | -8.00E-07 | -7.72E-04 | -7.73E-04 | 50 | 46 | 23 | -1.18E-03 | 2.05E-01  | 2.05E-01  |
| 51 | 47 | -2.20E-06 | -8.86E-04 | -8.86E-04 | 51 | 47 | 22 | -5.66E-04 | 2.39E-01  | 2.39E-01  |
| 52 | 48 | -6.00E-07 | 2.59E-05  | 2.58E-05  | 52 | 48 | 47 | 1.00E-03  | -6.72E-02 | -6.71E-02 |
| 53 | 49 | -1.00E-06 | 1.30E-05  | 1.42E-05  | 53 | 49 | 46 | 1.37E-03  | -4.75E-02 | -4.72E-02 |
| 54 | 1  | -5.80E-06 | -5.08E-04 | -5.10E-04 | 54 | 1  | 4  | -2.46E-03 | 3.49E+00  | 3.48E+00  |
| 55 | 54 | 5.16E-04  | 6.37E-04  | -6.58E-03 | 55 | 54 | 1  | 5.81E-01  | -3.75E-01 | 3.17E+00  |
| 56 | 54 | -5.32E-04 | -7.12E-03 | 9.95E-05  | 56 | 54 | 1  | -5.82E-01 | 2.59E+00  | -9.56E-01 |
| 57 | 54 | -1.90E-05 | 6.10E-03  | 6.10E-03  | 57 | 54 | 1  | 1.95E-03  | -2.20E+00 | -2.20E+00 |
| 58 | 55 | -4.72E-04 | -8.02E-04 | 5.18E-04  | 58 | 55 | 54 | 7.42E-02  | 7.65E-01  | 7.89E-01  |
| 59 | 55 | 3.98E-04  | 1.28E-03  | 4.00E-05  | 59 | 55 | 54 | 1.75E-01  | -1.15E+00 | 9.70E-02  |
| 60 | 55 | -4.92E-04 | -2.54E-04 | -1.26E-03 | 60 | 55 | 54 | -2.12E-01 | 9.42E-03  | -7.68E-01 |

|    |    |           |           |           |    |    |    |           |           |           |
|----|----|-----------|-----------|-----------|----|----|----|-----------|-----------|-----------|
| 61 | 56 | 4.66E-04  | 9.84E-04  | -3.36E-04 | 61 | 56 | 54 | -7.35E-02 | 7.16E-01  | 6.91E-01  |
| 62 | 56 | 4.97E-04  | -7.62E-04 | 2.40E-04  | 62 | 56 | 54 | 2.11E-01  | -5.58E-01 | 2.19E-01  |
| 63 | 56 | -4.00E-04 | -3.55E-04 | 8.85E-04  | 63 | 56 | 54 | -1.79E-01 | -7.90E-02 | -1.33E+00 |
| 64 | 57 | -2.00E-07 | 9.57E-04  | 9.56E-04  | 64 | 57 | 54 | 4.25E-04  | 5.19E-01  | 5.19E-01  |
| 65 | 57 | -1.63E-04 | -2.29E-04 | -1.47E-03 | 65 | 57 | 54 | -4.77E-02 | -9.65E-01 | 3.47E-01  |
| 66 | 57 | 1.65E-04  | -1.31E-03 | -6.59E-05 | 66 | 57 | 54 | 4.60E-02  | 3.94E-01  | -9.17E-01 |
| 67 | 10 | -1.90E-06 | 1.71E-04  | 1.67E-04  | 67 | 10 | 8  | -3.04E-04 | -3.48E-02 | -3.49E-02 |
| 68 | 67 | -1.06E-03 | -9.05E-04 | -2.55E-04 | 68 | 67 | 10 | 1.03E+00  | 1.21E+00  | -7.95E-02 |
| 69 | 67 | -1.33E-05 | -1.44E-04 | -1.41E-04 | 69 | 67 | 10 | 1.08E-03  | -7.26E-02 | -7.25E-02 |
| 70 | 67 | 1.04E-03  | 7.82E-04  | 1.38E-04  | 70 | 67 | 10 | -1.03E+00 | -1.11E+00 | 1.78E-01  |
| 71 | 68 | -3.71E-04 | -6.24E-04 | 2.96E-04  | 71 | 68 | 67 | 2.11E-01  | 3.87E-01  | -1.60E-01 |
| 72 | 68 | -4.26E-04 | -4.12E-04 | 1.05E-04  | 72 | 68 | 67 | 2.85E-01  | 2.94E-01  | -7.42E-02 |
| 73 | 68 | -2.05E-04 | -2.63E-04 | 1.55E-04  | 73 | 68 | 67 | -1.06E-01 | -2.08E-01 | 5.99E-02  |
| 74 | 69 | -9.47E-04 | -1.70E-03 | 1.70E-05  | 74 | 69 | 67 | -1.77E-01 | -1.39E-01 | -1.61E-01 |
| 75 | 69 | 1.80E-06  | 2.90E-05  | 2.83E-05  | 75 | 69 | 67 | -5.24E-04 | 2.32E-02  | 2.27E-02  |
| 76 | 69 | 9.43E-04  | 9.63E-04  | -7.54E-04 | 76 | 69 | 67 | 1.76E-01  | 1.58E-02  | 3.82E-02  |
| 77 | 70 | 2.11E-04  | 3.64E-04  | -5.72E-05 | 77 | 70 | 67 | 1.06E-01  | 1.65E-01  | -1.03E-01 |
| 78 | 70 | 4.19E-04  | 5.28E-04  | 1.08E-05  | 78 | 70 | 67 | -2.86E-01 | -3.60E-01 | 8.43E-03  |
| 79 | 70 | 3.72E-04  | 6.66E-04  | -2.53E-04 | 79 | 70 | 67 | -2.12E-01 | -3.69E-01 | 1.78E-01  |
| 80 | 3  | -4.20E-05 | -2.82E-03 | -2.81E-03 | 80 | 3  | 1  | 1.63E-03  | -8.23E-02 | -8.23E-02 |
| 81 | 2  | -6.70E-06 | -5.29E-03 | -5.28E-03 | 81 | 2  | 1  | -1.12E-03 | 6.12E-02  | 6.16E-02  |
| 82 | 7  | -5.30E-06 | 6.33E-04  | 6.32E-04  | 82 | 7  | 6  | 2.29E-04  | -1.98E-01 | -1.98E-01 |

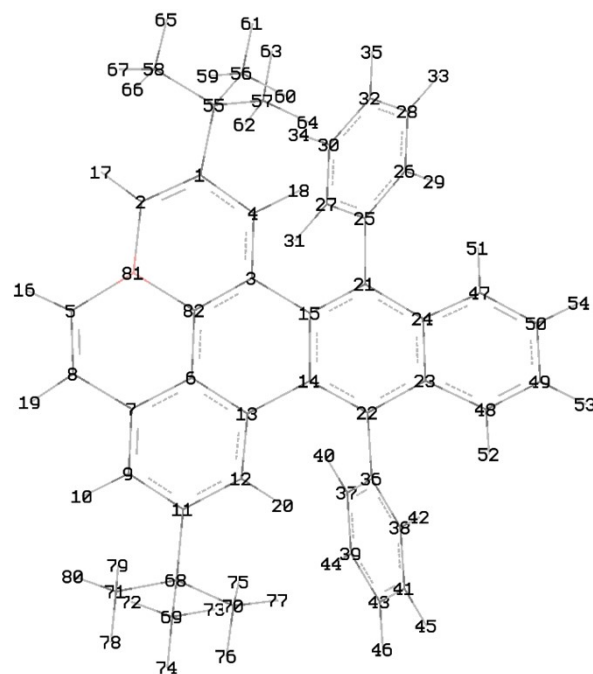

Table S18. Deviations in bond lengths and angles of B-2-MM, B-2-MP, and B-2-PM isomers by comparison with the B-2-PP structure.

| Atom1 | Atom2 | $\Delta r_{MM-PP}$ (Å) | $\Delta r_{PM-PP}$ (Å) | $\Delta r_{MP-PP}$ (Å) | Atom1 | Atom2 | Atom3 | $\Delta A_{MM-PP}$ (°) | $\Delta A_{PM-PP}$ (°) | $\Delta A_{MP-PP}$ (°) |
|-------|-------|------------------------|------------------------|------------------------|-------|-------|-------|------------------------|------------------------|------------------------|
| 2     | 1     | 5.00E-06               | -1.81E-03              | -1.81E-03              | -     | -     | -     | -                      | -                      | -                      |
| 3     | 1     | -5.40E-06              | -2.34E-03              | -2.34E-03              | 3     | 1     | 2     | -1.51E-03              | 2.62E-01               | 2.62E-01               |
| 4     | 3     | 1.05E-05               | -7.69E-03              | -7.68E-03              | 4     | 3     | 1     | 2.25E-04               | 1.87E-01               | 1.87E-01               |
| 5     | 2     | 9.10E-06               | -1.55E-03              | -1.55E-03              | 5     | 2     | 1     | 1.91E-04               | -7.66E-01              | -7.67E-01              |
| 6     | 3     | -2.07E-05              | 9.24E-04               | 9.34E-04               | 6     | 3     | 1     | 1.50E-03               | -1.94E+00              | -1.94E+00              |
| 7     | 6     | -9.60E-06              | -2.04E-04              | -2.10E-04              | 7     | 6     | 1     | -1.32E-03              | -4.66E-02              | -4.77E-02              |
| 8     | 5     | -2.00E-07              | -9.11E-04              | -9.13E-04              | 8     | 5     | 2     | -1.14E-03              | -1.98E+00              | -1.99E+00              |

|    |    |           |           |           |    |    |    |           |           |           |
|----|----|-----------|-----------|-----------|----|----|----|-----------|-----------|-----------|
| 9  | 7  | 1.30E-06  | -7.15E-05 | -7.19E-05 | 9  | 7  | 6  | 1.39E-03  | -9.60E-02 | -9.71E-02 |
| 10 | 9  | -9.00E-07 | -1.67E-04 | -1.64E-04 | 10 | 9  | 7  | 8.68E-04  | 3.02E-02  | 3.07E-02  |
| 11 | 9  | 4.00E-07  | -3.51E-04 | -3.52E-04 | 11 | 9  | 7  | -1.25E-03 | -1.79E-01 | -1.78E-01 |
| 12 | 11 | 3.70E-06  | 2.32E-03  | 2.32E-03  | 12 | 11 | 9  | 2.66E-04  | 3.63E-02  | 3.70E-02  |
| 13 | 12 | 7.00E-07  | -2.58E-03 | -2.57E-03 | 13 | 12 | 11 | 1.15E-03  | -1.61E-01 | -1.62E-01 |
| 14 | 13 | 1.49E-05  | 1.28E-03  | 1.27E-03  | 14 | 13 | 12 | 3.02E-05  | 1.43E+00  | 1.43E+00  |
| 15 | 14 | 7.10E-06  | 8.40E-03  | 8.43E-03  | 15 | 14 | 13 | -4.11E-04 | 7.70E-01  | 7.70E-01  |
| 16 | 5  | 1.70E-06  | -1.29E-04 | -1.31E-04 | 16 | 5  | 2  | 9.65E-04  | 6.31E-01  | 6.32E-01  |
| 17 | 2  | 3.00E-06  | -2.21E-04 | -2.19E-04 | 17 | 2  | 1  | -1.88E-04 | 6.09E-02  | 6.15E-02  |
| 18 | 4  | -6.10E-06 | -2.30E-04 | -2.26E-04 | 18 | 4  | 3  | 8.39E-04  | 8.49E-02  | 8.19E-02  |
| 19 | 8  | 4.60E-06  | -8.00E-05 | -7.73E-05 | 19 | 8  | 5  | 9.40E-04  | 1.96E-01  | 1.96E-01  |
| 20 | 12 | -7.30E-06 | -1.85E-04 | -1.86E-04 | 20 | 12 | 11 | -2.23E-03 | 1.35E-01  | 1.38E-01  |
| 21 | 15 | -1.12E-05 | -3.17E-03 | -3.18E-03 | 21 | 15 | 14 | 1.02E-03  | 5.29E-01  | 5.28E-01  |
| 22 | 14 | -3.00E-06 | -1.97E-03 | -2.00E-03 | 22 | 14 | 13 | 1.49E-03  | -1.69E+00 | -1.69E+00 |
| 23 | 22 | 1.01E-05  | 2.16E-03  | 2.19E-03  | 23 | 22 | 14 | 7.67E-04  | 9.05E-01  | 9.06E-01  |
| 24 | 21 | -7.00E-07 | -2.19E-03 | -2.20E-03 | 24 | 21 | 15 | 5.03E-04  | -1.28E-01 | -1.29E-01 |
| 25 | 21 | 8.00E-06  | 4.30E-03  | 4.30E-03  | 25 | 21 | 15 | 2.38E-03  | 1.80E+00  | 1.80E+00  |
| 26 | 25 | -2.76E-03 | -1.76E-03 | -4.40E-03 | 26 | 25 | 21 | -2.10E+00 | -7.42E-01 | -1.94E+00 |
| 27 | 25 | 2.76E-03  | -1.64E-03 | 1.00E-03  | 27 | 25 | 21 | 2.10E+00  | 1.55E-01  | 1.36E+00  |
| 28 | 26 | 1.06E-03  | 7.41E-04  | 1.67E-03  | 28 | 26 | 25 | -8.10E-02 | -9.71E-02 | -2.10E-01 |
| 29 | 26 | -7.44E-04 | 1.87E-04  | -6.58E-04 | 29 | 26 | 25 | -1.19E-01 | -2.33E-02 | -5.24E-02 |
| 30 | 27 | -1.06E-03 | 6.07E-04  | -3.19E-04 | 30 | 27 | 25 | 7.99E-02  | -1.29E-01 | -1.69E-02 |
| 31 | 27 | 7.43E-04  | 8.41E-05  | 9.29E-04  | 31 | 27 | 25 | 1.18E-01  | 6.61E-02  | 9.49E-02  |
| 32 | 30 | 5.70E-06  | 7.00E-07  | 5.40E-06  | 32 | 30 | 27 | -1.49E-05 | 1.32E-02  | 1.31E-02  |
| 33 | 28 | -1.47E-04 | 2.88E-05  | -4.32E-05 | 33 | 28 | 26 | -7.80E-02 | 2.97E-02  | -7.59E-02 |
| 34 | 30 | 1.48E-04  | 1.06E-04  | 1.78E-04  | 34 | 30 | 27 | 7.89E-02  | 2.74E-03  | 1.09E-01  |

|    |    |           |           |           |    |    |    |           |           |           |
|----|----|-----------|-----------|-----------|----|----|----|-----------|-----------|-----------|
| 35 | 32 | 2.00E-06  | -2.33E-05 | -2.23E-05 | 35 | 32 | 30 | -9.72E-04 | -4.77E-03 | -5.13E-03 |
| 36 | 22 | 8.00E-06  | 4.19E-03  | 4.20E-03  | 36 | 22 | 14 | 2.84E-03  | 1.41E+00  | 1.40E+00  |
| 37 | 36 | 2.43E-03  | 8.05E-04  | -1.50E-03 | 37 | 36 | 22 | 1.89E+00  | 1.35E+00  | 2.60E-01  |
| 38 | 36 | -2.43E-03 | -3.92E-03 | -1.62E-03 | 38 | 36 | 22 | -1.89E+00 | -1.64E+00 | -5.47E-01 |
| 39 | 37 | -3.70E-04 | 4.03E-04  | 7.52E-04  | 39 | 37 | 36 | 6.11E-02  | 1.50E-02  | -1.11E-01 |
| 40 | 37 | 6.11E-04  | 8.02E-04  | 1.60E-04  | 40 | 37 | 36 | 1.35E-01  | 9.13E-02  | 7.82E-02  |
| 41 | 38 | 3.75E-04  | 1.13E-03  | 7.78E-04  | 41 | 38 | 36 | -6.18E-02 | -1.72E-01 | -4.61E-02 |
| 42 | 38 | -6.10E-04 | -4.51E-04 | 1.93E-04  | 42 | 38 | 36 | -1.35E-01 | -5.64E-02 | -4.36E-02 |
| 43 | 39 | 5.00E-07  | 1.76E-04  | 1.80E-04  | 43 | 39 | 37 | 4.19E-05  | 3.35E-02  | 3.35E-02  |
| 44 | 39 | 1.17E-04  | 1.32E-04  | 1.78E-04  | 44 | 39 | 37 | 6.10E-02  | 7.82E-02  | -1.14E-02 |
| 45 | 41 | -1.14E-04 | 6.26E-05  | 1.65E-05  | 45 | 41 | 38 | -6.07E-02 | -7.24E-02 | 1.82E-02  |
| 46 | 43 | 2.20E-06  | -3.60E-05 | -3.44E-05 | 46 | 43 | 39 | -3.08E-05 | 2.87E-03  | 2.19E-03  |
| 47 | 24 | 2.20E-06  | 9.54E-04  | 9.44E-04  | 47 | 24 | 21 | -1.09E-03 | -4.13E+00 | -4.12E+00 |
| 48 | 23 | 1.04E-05  | 8.65E-04  | 8.60E-04  | 48 | 23 | 22 | 1.13E-03  | -5.48E-01 | -5.47E-01 |
| 49 | 48 | -2.40E-06 | -3.41E-04 | -3.32E-04 | 49 | 48 | 23 | 2.79E-04  | 2.13E-01  | 2.13E-01  |
| 50 | 47 | -1.20E-06 | -1.73E-04 | -1.71E-04 | 50 | 47 | 24 | -2.36E-04 | 1.92E-01  | 1.92E-01  |
| 51 | 47 | 1.60E-06  | -5.99E-04 | -5.96E-04 | 51 | 47 | 24 | -9.67E-04 | 2.84E-01  | 2.83E-01  |
| 52 | 48 | -1.60E-06 | -8.31E-04 | -8.33E-04 | 52 | 48 | 23 | 3.41E-05  | 2.50E-01  | 2.51E-01  |
| 53 | 49 | 2.10E-06  | 1.79E-05  | 1.79E-05  | 53 | 49 | 48 | -2.37E-04 | -6.58E-02 | -6.64E-02 |
| 54 | 50 | 6.00E-07  | 2.95E-05  | 2.80E-05  | 54 | 50 | 47 | 3.10E-04  | -7.36E-02 | -7.37E-02 |
| 55 | 1  | 6.00E-07  | -3.28E-04 | -3.32E-04 | 55 | 1  | 2  | 5.37E-04  | -2.55E-01 | -2.57E-01 |
| 56 | 55 | 1.92E-03  | -1.18E-03 | 2.00E-03  | 56 | 55 | 1  | 6.51E-01  | 3.67E-01  | 2.95E-01  |
| 57 | 55 | -1.90E-03 | 8.48E-05  | -3.09E-03 | 57 | 55 | 1  | -6.50E-01 | -3.55E-01 | -2.80E-01 |
| 58 | 55 | -4.00E-07 | 4.91E-05  | 4.51E-05  | 58 | 55 | 1  | -1.76E-03 | 5.00E-02  | 4.59E-02  |
| 59 | 56 | -4.61E-04 | 2.31E-05  | -4.78E-04 | 59 | 56 | 55 | 7.78E-02  | 1.05E-01  | 7.10E-02  |
| 60 | 56 | 1.03E-03  | -9.00E-04 | 1.05E-03  | 60 | 56 | 55 | 3.70E-01  | -6.18E-02 | 2.93E-01  |

|    |    |           |           |           |    |    |    |           |           |           |
|----|----|-----------|-----------|-----------|----|----|----|-----------|-----------|-----------|
| 61 | 56 | -5.85E-04 | 3.64E-05  | -5.49E-04 | 61 | 56 | 55 | -3.62E-01 | -1.39E-02 | -3.38E-01 |
| 62 | 57 | 4.61E-04  | -1.67E-05 | 4.85E-04  | 62 | 57 | 55 | -7.47E-02 | -5.65E-03 | 3.06E-02  |
| 63 | 57 | 5.91E-04  | 3.50E-05  | 6.22E-04  | 63 | 57 | 55 | 3.61E-01  | 2.35E-02  | 3.46E-01  |
| 64 | 57 | -1.02E-03 | 3.09E-05  | -1.92E-03 | 64 | 57 | 55 | -3.72E-01 | -7.64E-02 | -4.32E-01 |
| 65 | 58 | 1.40E-06  | 1.30E-05  | 1.17E-05  | 65 | 58 | 55 | 3.23E-04  | -4.07E-02 | -4.01E-02 |
| 66 | 58 | -2.13E-04 | -1.14E-04 | -1.65E-04 | 66 | 58 | 55 | -7.12E-02 | 4.02E-02  | -8.48E-02 |
| 67 | 58 | 2.18E-04  | 4.89E-05  | 1.03E-04  | 67 | 58 | 55 | 7.09E-02  | -1.22E-02 | 1.11E-01  |
| 68 | 11 | 1.60E-06  | -1.97E-04 | -1.94E-04 | 68 | 11 | 9  | -3.95E-04 | -4.90E-02 | -4.96E-02 |
| 69 | 68 | -8.61E-04 | -7.01E-04 | -1.08E-04 | 69 | 68 | 11 | 8.06E-01  | 1.10E+00  | -2.63E-01 |
| 70 | 68 | -1.00E-07 | -3.62E-04 | -3.68E-04 | 70 | 68 | 11 | -6.64E-04 | -4.77E-02 | -4.78E-02 |
| 71 | 68 | 8.61E-04  | 7.65E-04  | 1.78E-04  | 71 | 68 | 11 | -8.06E-01 | -1.08E+00 | 2.88E-01  |
| 72 | 69 | -2.18E-04 | -5.47E-04 | 3.16E-04  | 72 | 69 | 68 | 1.09E-01  | 3.48E-01  | -1.60E-01 |
| 73 | 69 | -3.40E-04 | -3.23E-04 | 2.22E-04  | 73 | 69 | 68 | 2.24E-01  | 2.44E-01  | -1.02E-01 |
| 74 | 69 | -1.49E-04 | -2.46E-04 | 1.07E-04  | 74 | 69 | 68 | -4.93E-02 | -1.94E-01 | 6.52E-02  |
| 75 | 70 | -7.24E-04 | -1.58E-03 | 3.78E-05  | 75 | 70 | 68 | -1.27E-01 | -1.27E-01 | -1.23E-01 |
| 76 | 70 | 2.30E-06  | 6.40E-06  | 8.30E-06  | 76 | 70 | 68 | 2.92E-04  | 1.60E-02  | 1.62E-02  |
| 77 | 70 | 7.30E-04  | 7.63E-04  | -8.56E-04 | 77 | 70 | 68 | 1.28E-01  | 2.40E-03  | -9.89E-04 |
| 78 | 71 | 1.54E-04  | 2.60E-04  | -9.51E-05 | 78 | 71 | 68 | 4.95E-02  | 1.17E-01  | -1.42E-01 |
| 79 | 71 | 3.39E-04  | 5.60E-04  | 1.75E-05  | 79 | 71 | 68 | -2.23E-01 | -3.26E-01 | 1.82E-02  |
| 80 | 71 | 2.24E-04  | 5.43E-04  | -3.22E-04 | 80 | 71 | 68 | -1.10E-01 | -2.75E-01 | 2.33E-01  |
| 81 | 2  | -2.20E-06 | -2.22E-03 | -2.20E-03 | 81 | 2  | 1  | 7.46E-04  | -2.80E-01 | -2.80E-01 |
| 82 | 3  | -2.31E-05 | 6.10E-03  | 6.09E-03  | 82 | 3  | 1  | 1.37E-03  | -5.27E-01 | -5.27E-01 |

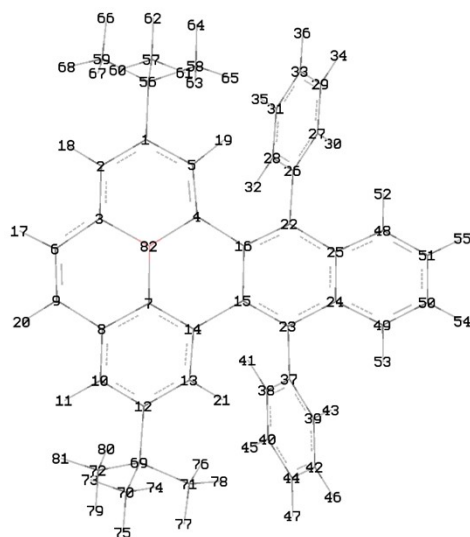

Table S19. Deviations in bond lengths and angles of B-3-*MM*, B-3-*MP*, and B-3-*PM* isomers by comparison with the B-3-*PP* structure.

| Atom1 | Atom2 | $\Delta r_{MM-PP}$ (Å) | $\Delta r_{PM-PP}$ (Å) | $\Delta r_{MP-PP}$ (Å) | Atom1 | Atom2 | Atom3 | $\Delta A_{MM-PP}$ (°) | $\Delta A_{PM-PP}$ (°) | $\Delta A_{MP-PP}$ (°) |
|-------|-------|------------------------|------------------------|------------------------|-------|-------|-------|------------------------|------------------------|------------------------|
| 1     | 2     | 0.00E+00               | 1.90E-02               | 1.90E-02               | -     | -     | -     | -                      | -                      | -                      |
| 1     | 5     | 0.00E+00               | -1.67E-02              | -1.67E-02              | 2     | 1     | 5     | -4.00E-04              | -7.93E-02              | -7.93E-02              |
| 1     | 56    | 0.00E+00               | 1.50E-03               | 1.50E-03               | 2     | 1     | 56    | -2.70E-03              | -3.99E+00              | -3.99E+00              |
| 2     | 3     | 0.00E+00               | -1.51E-02              | -1.51E-02              | 5     | 1     | 56    | 3.10E-03               | 4.08E+00               | 4.08E+00               |
| 2     | 18    | 0.00E+00               | 2.60E-03               | 2.60E-03               | 1     | 2     | 3     | 9.00E-04               | 6.53E-01               | 6.53E-01               |
| 3     | 6     | 0.00E+00               | 1.07E-02               | 1.07E-02               | 1     | 2     | 18    | -2.10E-03              | -1.13E+00              | -1.13E+00              |
| 3     | 82    | 0.00E+00               | -4.00E-04              | -4.00E-04              | 3     | 2     | 18    | 1.30E-03               | 3.27E-01               | 3.27E-01               |
| 4     | 5     | 0.00E+00               | 8.20E-03               | 8.20E-03               | 2     | 3     | 6     | 2.00E-03               | 9.72E-02               | 9.72E-02               |
| 4     | 16    | 0.00E+00               | -5.30E-03              | -5.30E-03              | 2     | 3     | 82    | -1.00E-03              | -3.76E-01              | -3.76E-01              |
| 4     | 82    | 0.00E+00               | 1.70E-03               | 1.70E-03               | 6     | 3     | 82    | -8.00E-04              | 1.00E-02               | 1.00E-02               |
| 5     | 19    | 0.00E+00               | -2.30E-03              | -2.30E-03              | 5     | 4     | 16    | -7.00E-03              | 4.24E-01               | 4.24E-01               |

|    |    |           |           |           |    |    |    |           |           |           |
|----|----|-----------|-----------|-----------|----|----|----|-----------|-----------|-----------|
| 6  | 9  | 1.00E-04  | -7.10E-03 | -7.10E-03 | 5  | 4  | 82 | 2.80E-03  | 6.74E-01  | 6.74E-01  |
| 6  | 17 | 0.00E+00  | -1.00E-04 | -1.00E-04 | 16 | 4  | 82 | 3.00E-03  | -7.15E-01 | -7.15E-01 |
| 7  | 8  | 0.00E+00  | -4.00E-04 | -4.00E-04 | 1  | 5  | 4  | -2.60E-03 | -9.15E-01 | -9.15E-01 |
| 7  | 14 | 0.00E+00  | 2.90E-03  | 2.90E-03  | 1  | 5  | 19 | 6.50E-03  | 1.47E+00  | 1.47E+00  |
| 7  | 82 | 0.00E+00  | 1.20E-03  | 1.20E-03  | 4  | 5  | 19 | -4.00E-03 | -5.52E-01 | -5.52E-01 |
| 8  | 9  | 0.00E+00  | 4.60E-03  | 4.60E-03  | 3  | 6  | 9  | -3.00E-04 | -4.21E-01 | -4.21E-01 |
| 8  | 10 | 0.00E+00  | -1.00E-04 | -1.00E-04 | 3  | 6  | 17 | 3.00E-04  | -1.40E-03 | -1.40E-03 |
| 9  | 20 | 0.00E+00  | 0.00E+00  | 0.00E+00  | 9  | 6  | 17 | 0.00E+00  | 3.13E-01  | 3.13E-01  |
| 10 | 11 | 0.00E+00  | -1.00E-04 | -1.00E-04 | 8  | 7  | 14 | 1.70E-03  | -1.72E-01 | -1.72E-01 |
| 10 | 12 | 0.00E+00  | -5.00E-04 | -5.00E-04 | 8  | 7  | 82 | -1.10E-03 | -2.89E-01 | -2.89E-01 |
| 12 | 13 | 0.00E+00  | 1.30E-03  | 1.30E-03  | 14 | 7  | 82 | 2.00E-04  | -6.95E-01 | -6.95E-01 |
| 12 | 69 | 0.00E+00  | 0.00E+00  | 0.00E+00  | 7  | 8  | 9  | 1.00E-04  | 1.83E-01  | 1.83E-01  |
| 13 | 14 | 0.00E+00  | -3.20E-03 | -3.20E-03 | 7  | 8  | 10 | -9.00E-04 | -6.58E-02 | -6.58E-02 |
| 13 | 21 | -1.00E-04 | 2.00E-04  | 2.00E-04  | 9  | 8  | 10 | 9.00E-04  | -2.07E-01 | -2.07E-01 |
| 14 | 15 | 0.00E+00  | 2.00E-04  | 2.00E-04  | 6  | 9  | 8  | 5.00E-04  | -3.71E-01 | -3.71E-01 |
| 15 | 16 | 0.00E+00  | 2.50E-03  | 2.50E-03  | 6  | 9  | 20 | -5.00E-04 | 2.27E-01  | 2.27E-01  |
| 15 | 23 | 0.00E+00  | -1.80E-03 | -1.80E-03 | 8  | 9  | 20 | 1.00E-04  | 5.40E-02  | 5.40E-02  |
| 16 | 22 | 0.00E+00  | -2.00E-04 | -2.00E-04 | 8  | 10 | 11 | 0.00E+00  | -6.63E-02 | -6.63E-02 |
| 22 | 25 | 0.00E+00  | 1.20E-03  | 1.20E-03  | 8  | 10 | 12 | 2.00E-04  | 5.52E-02  | 5.52E-02  |
| 22 | 26 | 0.00E+00  | 3.30E-03  | 3.30E-03  | 11 | 10 | 12 | -3.00E-04 | -5.58E-02 | -5.58E-02 |
| 23 | 24 | 0.00E+00  | 1.50E-03  | 1.50E-03  | 10 | 12 | 13 | 8.00E-04  | 8.00E-04  | 8.00E-04  |
| 23 | 37 | 0.00E+00  | 1.80E-03  | 1.80E-03  | 10 | 12 | 69 | -2.40E-03 | 7.20E-03  | 7.20E-03  |
| 24 | 25 | 1.00E-04  | -1.30E-03 | -1.30E-03 | 13 | 12 | 69 | 1.60E-03  | -5.30E-03 | -5.30E-03 |
| 24 | 49 | 0.00E+00  | 1.00E-04  | 1.00E-04  | 12 | 13 | 14 | -1.00E-04 | -1.79E-01 | -1.79E-01 |
| 25 | 48 | 0.00E+00  | 7.00E-04  | 7.00E-04  | 12 | 13 | 21 | 0.00E+00  | 1.94E-01  | 1.94E-01  |
| 26 | 27 | -2.30E-03 | -2.00E-03 | -2.40E-03 | 14 | 13 | 21 | 0.00E+00  | -1.21E-02 | -1.21E-02 |

|    |    |           |           |           |    |    |    |           |           |           |
|----|----|-----------|-----------|-----------|----|----|----|-----------|-----------|-----------|
| 26 | 28 | 2.40E-03  | -1.00E-04 | 3.00E-04  | 7  | 14 | 13 | -8.00E-04 | 1.94E-01  | 1.94E-01  |
| 27 | 29 | 3.00E-04  | 4.00E-04  | 1.00E-03  | 7  | 14 | 15 | 2.50E-03  | -8.47E-01 | -8.47E-01 |
| 27 | 30 | -8.00E-04 | -6.00E-04 | -2.00E-04 | 13 | 14 | 15 | -1.90E-03 | 7.27E-01  | 7.27E-01  |
| 28 | 31 | -3.00E-04 | 7.00E-04  | 1.00E-04  | 14 | 15 | 16 | -1.20E-03 | 4.92E-02  | 4.92E-02  |
| 28 | 32 | 8.00E-04  | 6.00E-04  | 2.00E-04  | 14 | 15 | 23 | 3.30E-03  | -7.24E-01 | -7.24E-01 |
| 29 | 33 | -9.00E-04 | -9.00E-04 | -4.00E-04 | 16 | 15 | 23 | -2.10E-03 | 5.35E-01  | 5.35E-01  |
| 29 | 34 | 0.00E+00  | 0.00E+00  | 1.00E-04  | 4  | 16 | 15 | -2.10E-03 | 3.30E-01  | 3.30E-01  |
| 31 | 33 | 9.00E-04  | 5.00E-04  | 0.00E+00  | 4  | 16 | 22 | 1.40E-03  | -1.13E+00 | -1.13E+00 |
| 31 | 35 | 0.00E+00  | 1.00E-04  | 0.00E+00  | 15 | 16 | 22 | 1.50E-03  | 5.93E-01  | 5.93E-01  |
| 33 | 36 | 0.00E+00  | -1.00E-04 | -1.00E-04 | 16 | 22 | 25 | -2.80E-03 | 3.90E-01  | 3.90E-01  |
| 37 | 38 | 2.60E-03  | 1.60E-03  | -9.00E-04 | 16 | 22 | 26 | 1.70E-03  | 1.35E+00  | 1.35E+00  |
| 37 | 39 | -2.60E-03 | -3.50E-03 | -1.00E-03 | 25 | 22 | 26 | 1.10E-03  | -1.90E+00 | -1.90E+00 |
| 38 | 40 | -4.00E-04 | 0.00E+00  | 2.00E-04  | 15 | 23 | 24 | -1.20E-03 | 4.56E-01  | 4.56E-01  |
| 38 | 41 | 7.00E-04  | 8.00E-04  | 1.00E-04  | 15 | 23 | 37 | -2.70E-03 | 5.69E-01  | 5.69E-01  |
| 39 | 42 | 4.00E-04  | 6.00E-04  | 4.00E-04  | 24 | 23 | 37 | 4.20E-03  | -1.14E+00 | -1.14E+00 |
| 39 | 43 | -7.00E-04 | -6.00E-04 | 1.00E-04  | 23 | 24 | 25 | 4.00E-04  | 2.81E-01  | 2.81E-01  |
| 40 | 44 | 7.00E-04  | 6.00E-04  | 2.00E-04  | 23 | 24 | 49 | -8.00E-04 | -3.67E-01 | -3.67E-01 |
| 40 | 45 | 2.00E-04  | 2.00E-04  | 1.00E-04  | 25 | 24 | 49 | 3.00E-04  | 7.11E-02  | 7.11E-02  |
| 42 | 44 | -7.00E-04 | -5.00E-04 | -1.00E-04 | 22 | 25 | 24 | -2.00E-04 | 2.98E-01  | 2.98E-01  |
| 42 | 46 | -2.00E-04 | -1.00E-04 | 0.00E+00  | 22 | 25 | 48 | 1.70E-03  | -4.29E-01 | -4.29E-01 |
| 44 | 47 | 0.00E+00  | 0.00E+00  | 0.00E+00  | 24 | 25 | 48 | -1.50E-03 | 1.09E-01  | 1.09E-01  |
| 48 | 51 | 0.00E+00  | -3.00E-04 | -3.00E-04 | 22 | 26 | 27 | -1.26E+00 | -5.11E-01 | -1.03E+00 |
| 48 | 52 | 0.00E+00  | -2.00E-04 | -2.00E-04 | 22 | 26 | 28 | 1.26E+00  | 2.30E-01  | 7.52E-01  |
| 49 | 50 | 0.00E+00  | 0.00E+00  | 0.00E+00  | 27 | 26 | 28 | -2.30E-03 | 9.98E-02  | 9.98E-02  |
| 49 | 53 | 0.00E+00  | -4.00E-04 | -4.00E-04 | 26 | 27 | 29 | -2.99E-02 | -4.37E-02 | -8.32E-02 |
| 50 | 51 | -1.00E-04 | -1.30E-03 | -1.30E-03 | 26 | 27 | 30 | -8.53E-02 | 2.39E-02  | -1.89E-02 |

|    |    |           |           |           |    |    |    |           |           |           |
|----|----|-----------|-----------|-----------|----|----|----|-----------|-----------|-----------|
| 50 | 54 | 0.00E+00  | 0.00E+00  | 0.00E+00  | 29 | 27 | 30 | 1.19E-01  | 2.30E-02  | 1.06E-01  |
| 51 | 55 | 0.00E+00  | 0.00E+00  | 0.00E+00  | 26 | 28 | 31 | 3.26E-02  | -5.14E-02 | -1.19E-02 |
| 56 | 57 | 1.00E-03  | -7.90E-03 | 4.00E-04  | 26 | 28 | 32 | 8.52E-02  | 6.64E-02  | 1.09E-01  |
| 56 | 58 | -1.00E-03 | -6.00E-04 | -8.90E-03 | 31 | 28 | 32 | -1.21E-01 | -1.45E-02 | -9.74E-02 |
| 56 | 59 | 0.00E+00  | 8.20E-03  | 8.20E-03  | 27 | 29 | 33 | 9.53E-02  | 2.84E-02  | 9.57E-02  |
| 57 | 60 | -2.00E-04 | -1.50E-03 | 2.00E-04  | 27 | 29 | 34 | -3.99E-02 | -2.16E-02 | -4.98E-02 |
| 57 | 61 | 4.00E-04  | 1.70E-03  | 6.00E-04  | 33 | 29 | 34 | -5.52E-02 | -7.20E-03 | -4.70E-02 |
| 57 | 62 | -5.00E-04 | -4.00E-04 | -1.20E-03 | 28 | 31 | 33 | -9.45E-02 | 6.00E-04  | -6.67E-02 |
| 58 | 63 | 2.00E-04  | 4.00E-04  | -1.30E-03 | 28 | 31 | 35 | 3.84E-02  | -1.04E-02 | 1.78E-02  |
| 58 | 64 | 5.00E-04  | -7.00E-04 | 1.00E-04  | 33 | 31 | 35 | 5.59E-02  | 8.50E-03  | 4.83E-02  |
| 58 | 65 | -4.00E-04 | 2.00E-04  | 1.30E-03  | 29 | 33 | 31 | -1.00E-03 | -2.59E-02 | -2.59E-02 |
| 59 | 66 | 0.00E+00  | 1.00E-03  | 1.00E-03  | 29 | 33 | 36 | 3.65E-02  | 2.32E-02  | 3.85E-02  |
| 59 | 67 | -3.00E-04 | -2.00E-04 | -2.00E-03 | 31 | 33 | 36 | -3.54E-02 | 2.30E-03  | -1.30E-02 |
| 59 | 68 | 3.00E-04  | -1.70E-03 | 1.00E-04  | 23 | 37 | 38 | 1.73E+00  | 1.41E+00  | 1.62E-01  |
| 69 | 70 | -8.00E-04 | -7.00E-04 | -1.00E-04 | 23 | 37 | 39 | -1.73E+00 | -1.57E+00 | -3.26E-01 |
| 69 | 71 | 0.00E+00  | 0.00E+00  | 0.00E+00  | 38 | 37 | 39 | -1.00E-03 | 1.32E-01  | 1.32E-01  |
| 69 | 72 | 8.00E-04  | 7.00E-04  | 1.00E-04  | 37 | 38 | 40 | 4.94E-02  | 6.50E-03  | -8.62E-02 |
| 70 | 73 | -7.00E-04 | -9.00E-04 | 1.00E-04  | 37 | 38 | 41 | 1.78E-01  | 1.53E-01  | 5.46E-02  |
| 70 | 74 | -6.00E-04 | -6.00E-04 | 0.00E+00  | 40 | 38 | 41 | -2.25E-01 | -1.53E-01 | 3.13E-02  |
| 70 | 75 | -3.00E-04 | -3.00E-04 | 1.00E-04  | 37 | 39 | 42 | -4.83E-02 | -1.35E-01 | -4.26E-02 |
| 71 | 76 | -1.10E-03 | -1.40E-03 | 0.00E+00  | 37 | 39 | 43 | -1.78E-01 | -1.23E-01 | -2.50E-02 |
| 71 | 77 | 0.00E+00  | 0.00E+00  | 0.00E+00  | 42 | 39 | 43 | 2.24E-01  | 2.55E-01  | 7.10E-02  |
| 71 | 78 | 1.10E-03  | 1.10E-03  | -3.00E-04 | 38 | 40 | 44 | -1.10E-01 | -1.36E-01 | 1.53E-02  |
| 72 | 79 | 3.00E-04  | 4.00E-04  | 0.00E+00  | 38 | 40 | 45 | 6.62E-02  | 9.12E-02  | -4.40E-03 |
| 72 | 80 | 6.00E-04  | 6.00E-04  | 0.00E+00  | 44 | 40 | 45 | 4.10E-02  | 4.31E-02  | -1.09E-02 |
| 72 | 81 | 7.00E-04  | 8.00E-04  | -2.00E-04 | 39 | 42 | 44 | 1.10E-01  | 1.25E-01  | -2.56E-02 |

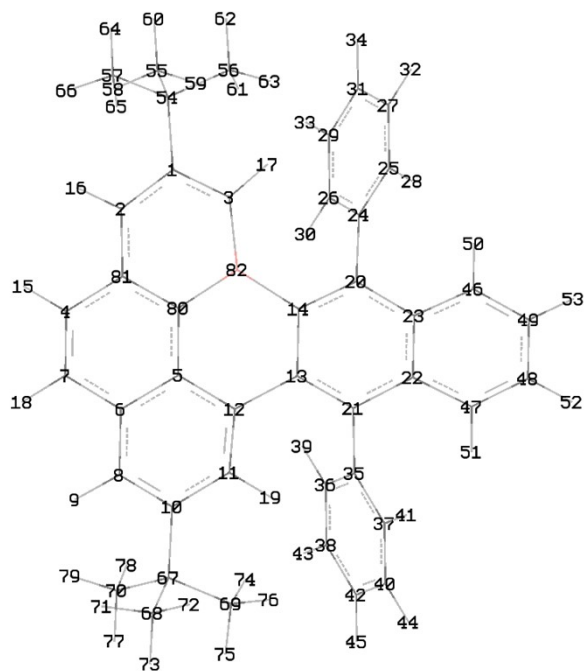

Table S20. Deviations in bond lengths and angles of B-4-*MM*, B-4-*MP*, and B-4-*PM* isomers by comparison with the B-4-*PP* structure.

| Atom1 | Atom2 | $\Delta r_{MM-PP}$ (Å) | $\Delta r_{PM-PP}$ (Å) | $\Delta r_{MP-PP}$ (Å) | Atom1 | Atom2 | Atom3 | $\Delta A_{MM-PP}$ (°) | $\Delta A_{PM-PP}$ (°) | $\Delta A_{MP-PP}$ (°) |
|-------|-------|------------------------|------------------------|------------------------|-------|-------|-------|------------------------|------------------------|------------------------|
| 2     | 1     | 4.30E-06               | -                      | -                      | -     | -     | -     | -                      | -                      | -                      |
| 3     | 1     | -8.60E-06              | -                      | -                      | 3     | 1     | 2     | -3.38E-05              | -                      | -                      |
| 4     | 2     | 4.00E-07               | -                      | -                      | 4     | 2     | 1     | 2.12E-04               | -                      | -                      |
| 5     | 4     | 1.11E-05               | -                      | -                      | 5     | 4     | 2     | -1.69E-04              | -                      | -                      |
| 6     | 5     | -6.90E-06              | -                      | -                      | 6     | 5     | 4     | -3.28E-04              | -                      | -                      |
| 7     | 4     | -2.80E-06              | -                      | -                      | 7     | 4     | 2     | -2.72E-04              | -                      | -                      |
| 8     | 6     | 3.70E-06               | -                      | -                      | 8     | 6     | 5     | 3.78E-04               | -                      | -                      |

|    |    |           |   |   |    |    |    |           |   |   |
|----|----|-----------|---|---|----|----|----|-----------|---|---|
| 9  | 8  | -2.80E-06 | - | - | 9  | 8  | 6  | -6.13E-04 | - | - |
| 10 | 8  | -2.40E-06 | - | - | 10 | 8  | 6  | -4.22E-04 | - | - |
| 11 | 10 | 3.00E-07  | - | - | 11 | 10 | 8  | -9.71E-05 | - | - |
| 12 | 11 | 5.00E-07  | - | - | 12 | 11 | 10 | 3.68E-04  | - | - |
| 13 | 12 | 5.00E-06  | - | - | 13 | 12 | 11 | 2.50E-04  | - | - |
| 14 | 13 | 9.00E-07  | - | - | 14 | 13 | 12 | -5.52E-05 | - | - |
| 15 | 4  | -2.80E-06 | - | - | 15 | 4  | 2  | -6.43E-04 | - | - |
| 16 | 2  | -2.20E-06 | - | - | 16 | 2  | 1  | 8.77E-05  | - | - |
| 17 | 3  | -2.20E-06 | - | - | 17 | 3  | 1  | 2.63E-04  | - | - |
| 18 | 7  | -1.60E-06 | - | - | 18 | 7  | 4  | 1.10E-03  | - | - |
| 19 | 11 | -2.90E-06 | - | - | 19 | 11 | 10 | -1.62E-03 | - | - |
| 20 | 14 | -2.20E-06 | - | - | 20 | 14 | 13 | -2.25E-04 | - | - |
| 21 | 13 | -5.40E-06 | - | - | 21 | 13 | 12 | -1.26E-04 | - | - |
| 22 | 21 | 5.30E-06  | - | - | 22 | 21 | 13 | 2.16E-04  | - | - |
| 23 | 22 | -4.30E-06 | - | - | 23 | 22 | 21 | -3.24E-04 | - | - |
| 24 | 20 | -3.10E-06 | - | - | 24 | 20 | 14 | 7.04E-04  | - | - |
| 25 | 24 | -2.25E-03 | - | - | 25 | 24 | 20 | -9.97E-01 | - | - |
| 26 | 24 | 2.25E-03  | - | - | 26 | 24 | 20 | 9.97E-01  | - | - |
| 27 | 25 | 1.07E-03  | - | - | 27 | 25 | 24 | 1.68E-02  | - | - |
| 28 | 25 | -6.31E-04 | - | - | 28 | 25 | 24 | -1.39E-01 | - | - |
| 29 | 26 | -1.07E-03 | - | - | 29 | 26 | 24 | -1.67E-02 | - | - |
| 30 | 26 | 6.29E-04  | - | - | 30 | 26 | 24 | 1.39E-01  | - | - |
| 31 | 29 | -2.00E-07 | - | - | 31 | 29 | 26 | -6.00E-05 | - | - |
| 32 | 27 | -3.35E-05 | - | - | 32 | 27 | 25 | -2.50E-02 | - | - |
| 33 | 29 | 3.32E-05  | - | - | 33 | 29 | 26 | 2.53E-02  | - | - |
| 34 | 31 | -9.00E-07 | - | - | 34 | 31 | 29 | 1.01E-04  | - | - |

|    |    |           |   |   |    |    |    |           |   |   |
|----|----|-----------|---|---|----|----|----|-----------|---|---|
| 35 | 21 | 5.70E-06  | - | - | 35 | 21 | 13 | -1.97E-04 | - | - |
| 36 | 35 | 1.92E-03  | - | - | 36 | 35 | 21 | 1.52E+00  | - | - |
| 37 | 35 | -1.93E-03 | - | - | 37 | 35 | 21 | -1.52E+00 | - | - |
| 38 | 36 | 6.19E-04  | - | - | 38 | 36 | 35 | 8.14E-02  | - | - |
| 39 | 36 | 7.32E-04  | - | - | 39 | 36 | 35 | 1.58E-01  | - | - |
| 40 | 37 | -6.17E-04 | - | - | 40 | 37 | 35 | -8.24E-02 | - | - |
| 41 | 37 | -7.35E-04 | - | - | 41 | 37 | 35 | -1.59E-01 | - | - |
| 42 | 40 | -3.30E-06 | - | - | 42 | 40 | 37 | -1.79E-04 | - | - |
| 43 | 38 | 1.09E-04  | - | - | 43 | 38 | 36 | 5.22E-02  | - | - |
| 44 | 40 | -1.09E-04 | - | - | 44 | 40 | 37 | -5.14E-02 | - | - |
| 45 | 42 | -2.00E-07 | - | - | 45 | 42 | 40 | 2.19E-04  | - | - |
| 46 | 23 | 4.40E-06  | - | - | 46 | 23 | 22 | -3.58E-04 | - | - |
| 47 | 22 | 4.00E-06  | - | - | 47 | 22 | 21 | -1.01E-04 | - | - |
| 48 | 47 | -5.20E-06 | - | - | 48 | 47 | 22 | -3.49E-04 | - | - |
| 49 | 46 | -5.50E-06 | - | - | 49 | 46 | 23 | -3.77E-05 | - | - |
| 50 | 46 | -9.00E-07 | - | - | 50 | 46 | 23 | -4.69E-04 | - | - |
| 51 | 47 | -2.30E-06 | - | - | 51 | 47 | 22 | -5.30E-04 | - | - |
| 52 | 48 | -7.00E-07 | - | - | 52 | 48 | 47 | 6.87E-04  | - | - |
| 53 | 49 | 1.00E-07  | - | - | 53 | 49 | 46 | 4.55E-04  | - | - |
| 54 | 1  | -3.90E-06 | - | - | 54 | 1  | 3  | 7.73E-05  | - | - |
| 55 | 54 | 3.06E-04  | - | - | 55 | 54 | 1  | 6.49E-01  | - | - |
| 56 | 54 | -3.01E-04 | - | - | 56 | 54 | 1  | -6.50E-01 | - | - |
| 57 | 54 | -2.80E-06 | - | - | 57 | 54 | 1  | -4.55E-05 | - | - |
| 58 | 55 | -2.58E-04 | - | - | 58 | 55 | 54 | 8.11E-02  | - | - |
| 59 | 55 | 8.30E-06  | - | - | 59 | 55 | 54 | 4.53E-01  | - | - |
| 60 | 55 | -3.85E-04 | - | - | 60 | 55 | 54 | -2.15E-01 | - | - |

|    |    |           |   |   |    |    |    |           |   |   |
|----|----|-----------|---|---|----|----|----|-----------|---|---|
| 61 | 56 | 2.56E-04  | - | - | 61 | 56 | 54 | -8.09E-02 | - | - |
| 62 | 56 | 3.84E-04  | - | - | 62 | 56 | 54 | 2.15E-01  | - | - |
| 63 | 56 | -9.10E-06 | - | - | 63 | 56 | 54 | -4.53E-01 | - | - |
| 64 | 57 | -1.00E-06 | - | - | 64 | 57 | 54 | 2.33E-04  | - | - |
| 65 | 57 | -2.96E-04 | - | - | 65 | 57 | 54 | 1.26E-01  | - | - |
| 66 | 57 | 2.96E-04  | - | - | 66 | 57 | 54 | -1.26E-01 | - | - |
| 67 | 10 | -2.70E-06 | - | - | 67 | 10 | 8  | 2.63E-03  | - | - |
| 68 | 67 | -1.15E-03 | - | - | 68 | 67 | 10 | 1.53E+00  | - | - |
| 69 | 67 | 3.30E-06  | - | - | 69 | 67 | 10 | -6.74E-04 | - | - |
| 70 | 67 | 1.15E-03  | - | - | 70 | 67 | 10 | -1.53E+00 | - | - |
| 71 | 68 | -9.36E-04 | - | - | 71 | 68 | 67 | 6.36E-01  | - | - |
| 72 | 68 | -6.65E-04 | - | - | 72 | 68 | 67 | 3.85E-01  | - | - |
| 73 | 68 | -5.22E-04 | - | - | 73 | 68 | 67 | -2.75E-01 | - | - |
| 74 | 69 | -1.20E-03 | - | - | 74 | 69 | 67 | 1.40E-02  | - | - |
| 75 | 69 | 9.00E-07  | - | - | 75 | 69 | 67 | -5.86E-05 | - | - |
| 76 | 69 | 1.20E-03  | - | - | 76 | 69 | 67 | -1.32E-02 | - | - |
| 77 | 70 | 5.21E-04  | - | - | 77 | 70 | 67 | 2.75E-01  | - | - |
| 78 | 70 | 6.63E-04  | - | - | 78 | 70 | 67 | -3.84E-01 | - | - |
| 79 | 70 | 9.33E-04  | - | - | 79 | 70 | 67 | -6.35E-01 | - | - |
| 80 | 5  | 2.20E-06  | - | - | 80 | 5  | 4  | -8.18E-05 | - | - |
| 81 | 80 | -2.10E-06 | - | - | 81 | 80 | 5  | 1.09E-04  | - | - |
| 82 | 80 | -3.60E-06 | - | - | 82 | 80 | 5  | 1.23E-04  | - | - |

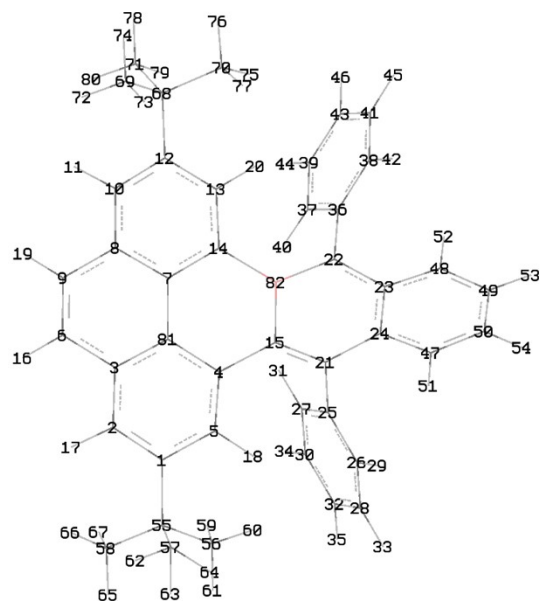

Table S21. Deviations in bond lengths and angles of B-5-MM, B-5-MP, and B-5-PM isomers by comparison with the B-5-PP structure.

| Atom1 | Atom2 | $\Delta r_{MM-PP}$ (Å) | $\Delta r_{PM-PP}$ (Å) | $\Delta r_{MP-PP}$ (Å) | Atom1 | Atom2 | Atom3 | $\Delta A_{MM-PP}$ (°) | $\Delta A_{PM-PP}$ (°) | $\Delta A_{MP-PP}$ (°) |
|-------|-------|------------------------|------------------------|------------------------|-------|-------|-------|------------------------|------------------------|------------------------|
| 2     | 1     | 6.00E-07               | -                      | -                      | -     | -     | -     | -                      | -                      | -                      |
| 3     | 1     | 1.00E-07               | -                      | -                      | 3     | 1     | 2     | -1.16E-05              | -                      | -                      |
| 4     | 3     | -5.00E-07              | -                      | -                      | 4     | 3     | 1     | -3.76E-05              | -                      | -                      |
| 5     | 2     | 2.40E-06               | -                      | -                      | 5     | 2     | 1     | -2.13E-05              | -                      | -                      |
| 6     | 3     | -1.00E-07              | -                      | -                      | 6     | 3     | 1     | 3.30E-05               | -                      | -                      |
| 7     | 6     | -7.00E-07              | -                      | -                      | 7     | 6     | 3     | 1.10E-04               | -                      | -                      |
| 8     | 5     | 1.00E-07               | -                      | -                      | 8     | 5     | 2     | -7.07E-05              | -                      | -                      |
| 9     | 7     | 2.00E-07               | -                      | -                      | 9     | 7     | 6     | -8.10E-06              | -                      | -                      |

|    |    |           |   |   |    |    |    |           |   |   |
|----|----|-----------|---|---|----|----|----|-----------|---|---|
| 10 | 9  | 2.00E-07  | - | - | 10 | 9  | 7  | -5.54E-05 | - | - |
| 11 | 9  | -3.00E-07 | - | - | 11 | 9  | 7  | 5.60E-05  | - | - |
| 12 | 11 | 1.00E-06  | - | - | 12 | 11 | 9  | -3.12E-05 | - | - |
| 13 | 12 | 2.00E-07  | - | - | 13 | 12 | 11 | -7.38E-05 | - | - |
| 14 | 13 | -2.20E-06 | - | - | 14 | 13 | 12 | 3.10E-06  | - | - |
| 15 | 5  | 1.00E-06  | - | - | 15 | 5  | 2  | 8.13E-05  | - | - |
| 16 | 2  | 3.00E-07  | - | - | 16 | 2  | 1  | -1.05E-04 | - | - |
| 17 | 4  | 2.00E-07  | - | - | 17 | 4  | 3  | -5.67E-05 | - | - |
| 18 | 8  | 2.00E-07  | - | - | 18 | 8  | 5  | -6.30E-05 | - | - |
| 19 | 12 | 6.00E-07  | - | - | 19 | 12 | 11 | 2.06E-04  | - | - |
| 20 | 14 | -2.40E-06 | - | - | 20 | 14 | 13 | 3.59E-05  | - | - |
| 21 | 14 | 1.20E-06  | - | - | 21 | 14 | 13 | -8.18E-05 | - | - |
| 22 | 21 | -7.00E-07 | - | - | 22 | 21 | 14 | -1.40E-04 | - | - |
| 23 | 20 | -1.00E-07 | - | - | 23 | 20 | 14 | 6.32E-05  | - | - |
| 24 | 20 | 1.20E-06  | - | - | 24 | 20 | 14 | -1.62E-04 | - | - |
| 25 | 24 | -1.39E-03 | - | - | 25 | 24 | 20 | -2.27E+00 | - | - |
| 26 | 24 | 1.39E-03  | - | - | 26 | 24 | 20 | 2.27E+00  | - | - |
| 27 | 25 | -9.81E-04 | - | - | 27 | 25 | 24 | 6.23E-02  | - | - |
| 28 | 25 | -3.01E-04 | - | - | 28 | 25 | 24 | -1.01E-01 | - | - |
| 29 | 26 | 9.83E-04  | - | - | 29 | 26 | 24 | -6.25E-02 | - | - |
| 30 | 26 | 3.00E-04  | - | - | 30 | 26 | 24 | 1.01E-01  | - | - |
| 31 | 27 | -9.00E-07 | - | - | 31 | 27 | 25 | 6.20E-06  | - | - |
| 32 | 27 | -9.42E-05 | - | - | 32 | 27 | 25 | 6.60E-03  | - | - |
| 33 | 29 | 9.54E-05  | - | - | 33 | 29 | 26 | -6.60E-03 | - | - |
| 34 | 31 | 0.00E+00  | - | - | 34 | 31 | 27 | 1.00E-07  | - | - |
| 35 | 21 | -1.20E-06 | - | - | 35 | 21 | 14 | -1.32E-04 | - | - |

|    |    |           |   |   |    |    |    |           |   |   |
|----|----|-----------|---|---|----|----|----|-----------|---|---|
| 36 | 35 | 2.87E-03  | - | - | 36 | 35 | 21 | 1.65E+00  | - | - |
| 37 | 35 | -2.87E-03 | - | - | 37 | 35 | 21 | -1.65E+00 | - | - |
| 38 | 36 | -3.43E-04 | - | - | 38 | 36 | 35 | 5.61E-02  | - | - |
| 39 | 36 | 8.06E-04  | - | - | 39 | 36 | 35 | 2.34E-01  | - | - |
| 40 | 37 | 3.43E-04  | - | - | 40 | 37 | 35 | -5.60E-02 | - | - |
| 41 | 37 | -8.07E-04 | - | - | 41 | 37 | 35 | -2.34E-01 | - | - |
| 42 | 38 | 2.00E-07  | - | - | 42 | 38 | 36 | -4.87E-05 | - | - |
| 43 | 38 | 1.04E-04  | - | - | 43 | 38 | 36 | 7.38E-02  | - | - |
| 44 | 40 | -1.05E-04 | - | - | 44 | 40 | 37 | -7.38E-02 | - | - |
| 45 | 42 | -1.20E-06 | - | - | 45 | 42 | 38 | 1.11E-05  | - | - |
| 46 | 23 | -1.80E-06 | - | - | 46 | 23 | 20 | 4.96E-05  | - | - |
| 47 | 22 | 3.00E-07  | - | - | 47 | 22 | 21 | -7.07E-05 | - | - |
| 48 | 47 | -9.00E-07 | - | - | 48 | 47 | 22 | -3.64E-05 | - | - |
| 49 | 46 | 1.20E-06  | - | - | 49 | 46 | 23 | -3.97E-05 | - | - |
| 50 | 46 | -7.00E-07 | - | - | 50 | 46 | 23 | 7.73E-05  | - | - |
| 51 | 47 | -5.00E-07 | - | - | 51 | 47 | 22 | -4.73E-05 | - | - |
| 52 | 48 | -4.00E-07 | - | - | 52 | 48 | 47 | 8.19E-05  | - | - |
| 53 | 49 | 1.00E-07  | - | - | 53 | 49 | 46 | -8.90E-06 | - | - |
| 54 | 1  | -1.00E-06 | - | - | 54 | 1  | 2  | 3.35E-05  | - | - |
| 55 | 54 | 3.20E-04  | - | - | 55 | 54 | 1  | 3.18E-01  | - | - |
| 56 | 54 | -3.20E-04 | - | - | 56 | 54 | 1  | -3.18E-01 | - | - |
| 57 | 54 | 3.00E-07  | - | - | 57 | 54 | 1  | -4.23E-05 | - | - |
| 58 | 55 | -3.27E-04 | - | - | 58 | 55 | 54 | 1.17E-01  | - | - |
| 59 | 55 | 9.15E-05  | - | - | 59 | 55 | 54 | 5.59E-02  | - | - |
| 60 | 55 | -3.69E-04 | - | - | 60 | 55 | 54 | -1.15E-01 | - | - |
| 61 | 56 | 3.27E-04  | - | - | 61 | 56 | 54 | -1.17E-01 | - | - |

|    |    |           |   |   |    |    |    |           |   |   |
|----|----|-----------|---|---|----|----|----|-----------|---|---|
| 62 | 56 | 3.69E-04  | - | - | 62 | 56 | 54 | 1.16E-01  | - | - |
| 63 | 56 | -9.13E-05 | - | - | 63 | 56 | 54 | -5.59E-02 | - | - |
| 64 | 57 | 4.00E-07  | - | - | 64 | 57 | 54 | -3.91E-05 | - | - |
| 65 | 57 | -1.47E-04 | - | - | 65 | 57 | 54 | 2.76E-02  | - | - |
| 66 | 57 | 1.46E-04  | - | - | 66 | 57 | 54 | -2.76E-02 | - | - |
| 67 | 11 | 5.00E-07  | - | - | 67 | 11 | 9  | 1.75E-04  | - | - |
| 68 | 67 | -1.11E-03 | - | - | 68 | 67 | 11 | 1.32E+00  | - | - |
| 69 | 67 | -2.00E-07 | - | - | 69 | 67 | 11 | -6.42E-05 | - | - |
| 70 | 67 | 1.11E-03  | - | - | 70 | 67 | 11 | -1.32E+00 | - | - |
| 71 | 68 | -6.45E-04 | - | - | 71 | 68 | 67 | 4.50E-01  | - | - |
| 72 | 68 | -6.19E-04 | - | - | 72 | 68 | 67 | 3.55E-01  | - | - |
| 73 | 68 | -3.77E-04 | - | - | 73 | 68 | 67 | -2.17E-01 | - | - |
| 74 | 69 | -8.16E-04 | - | - | 74 | 69 | 67 | 5.47E-02  | - | - |
| 75 | 69 | 5.00E-07  | - | - | 75 | 69 | 67 | -7.00E-06 | - | - |
| 76 | 69 | 8.15E-04  | - | - | 76 | 69 | 67 | -5.47E-02 | - | - |
| 77 | 70 | 3.77E-04  | - | - | 77 | 70 | 67 | 2.17E-01  | - | - |
| 78 | 70 | 6.19E-04  | - | - | 78 | 70 | 67 | -3.55E-01 | - | - |
| 79 | 70 | 6.46E-04  | - | - | 79 | 70 | 67 | -4.50E-01 | - | - |
| 80 | 3  | -9.00E-07 | - | - | 80 | 3  | 1  | 3.78E-05  | - | - |
| 81 | 2  | 2.00E-07  | - | - | 81 | 2  | 1  | 2.22E-05  | - | - |
| 82 | 14 | -1.40E-06 | - | - | 82 | 14 | 13 | -1.00E-06 | - | - |

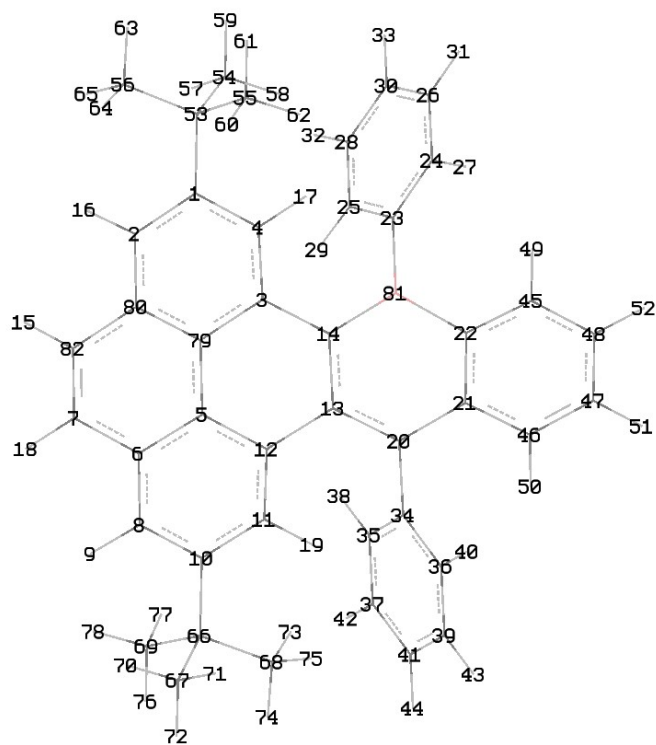

Table S22. Deviations in bond lengths and angles of B-6-MM, B-6-MP, and B-6-PM isomers by comparison with the B-6-PP structure.

| Atom1 | Atom2 | $\Delta r_{MM-PP}$ (Å) | $\Delta r_{PM-PP}$ (Å) | $\Delta r_{MP-PP}$ (Å) | Atom1 | Atom2 | Atom3 | $\Delta A_{MM-PP}$ (°) | $\Delta A_{PM-PP}$ (°) | $\Delta A_{MP-PP}$ (°) |
|-------|-------|------------------------|------------------------|------------------------|-------|-------|-------|------------------------|------------------------|------------------------|
| 2     | 1     | 1.04E-05               | 5.29E-03               | 5.29E-03               | -     | -     | -     | -                      | -                      | -                      |
| 3     | 1     | 5.90E-06               | -3.48E-04              | -3.48E-04              | 3     | 1     | 2     | -4.34E-04              | -1.71E-01              | -1.71E-01              |
| 4     | 1     | -1.36E-05              | -5.09E-03              | -5.09E-03              | 4     | 1     | 2     | -1.82E-04              | 1.13E-02               | 1.13E-02               |
| 5     | 3     | -2.20E-06              | -4.68E-03              | -4.68E-03              | 5     | 3     | 1     | 1.74E-04               | -6.97E-01              | -6.97E-01              |
| 6     | 5     | 7.00E-07               | 2.23E-04               | 2.23E-04               | 6     | 5     | 3     | 2.41E-04               | -1.77E-01              | -1.77E-01              |

|    |    |           |           |           |    |    |    |           |           |           |
|----|----|-----------|-----------|-----------|----|----|----|-----------|-----------|-----------|
| 7  | 6  | -4.90E-06 | 1.31E-03  | 1.31E-03  | 7  | 6  | 5  | 6.28E-04  | 6.36E-02  | 6.36E-02  |
| 8  | 6  | 2.80E-06  | -1.82E-03 | -1.81E-03 | 8  | 6  | 5  | 8.02E-04  | -5.74E-02 | -5.74E-02 |
| 9  | 8  | -2.00E-06 | -1.78E-04 | -1.78E-04 | 9  | 8  | 6  | -1.44E-04 | 4.17E-02  | 4.17E-02  |
| 10 | 8  | -3.70E-06 | 1.02E-03  | 1.02E-03  | 10 | 8  | 6  | -4.52E-04 | -1.56E-01 | -1.56E-01 |
| 11 | 10 | 2.80E-06  | -3.51E-04 | -3.50E-04 | 11 | 10 | 8  | -4.00E-04 | -2.39E-02 | -2.39E-02 |
| 12 | 11 | -4.90E-06 | 1.61E-03  | 1.61E-03  | 12 | 11 | 10 | 9.16E-04  | 2.15E-02  | 2.15E-02  |
| 13 | 12 | -1.20E-06 | 1.27E-03  | 1.27E-03  | 13 | 12 | 11 | 9.08E-04  | 1.13E+00  | 1.13E+00  |
| 14 | 13 | 2.70E-05  | 3.28E-03  | 3.28E-03  | 14 | 13 | 12 | -8.17E-04 | 3.98E-01  | 3.98E-01  |
| 15 | 7  | -3.50E-06 | -8.14E-05 | -8.19E-05 | 15 | 7  | 6  | 4.27E-04  | -2.57E-01 | -2.57E-01 |
| 16 | 2  | -1.00E-07 | 1.81E-03  | 1.81E-03  | 16 | 2  | 1  | -7.27E-04 | -4.35E-01 | -4.35E-01 |
| 17 | 4  | 9.00E-07  | -4.27E-03 | -4.27E-03 | 17 | 4  | 1  | 8.69E-04  | 3.17E-01  | 3.17E-01  |
| 18 | 7  | -2.00E-07 | -3.01E-05 | -3.04E-05 | 18 | 7  | 6  | -6.96E-04 | 3.89E-02  | 3.89E-02  |
| 19 | 11 | -3.70E-06 | -3.98E-04 | -3.99E-04 | 19 | 11 | 10 | -9.61E-04 | -1.00E-01 | -1.00E-01 |
| 20 | 13 | -4.46E-05 | 4.97E-03  | 4.97E-03  | 20 | 13 | 12 | 8.65E-04  | -1.72E+00 | -1.72E+00 |
| 21 | 20 | 3.19E-05  | -9.53E-04 | -9.54E-04 | 21 | 20 | 13 | 7.98E-04  | 6.06E-01  | 6.06E-01  |
| 22 | 21 | -3.70E-06 | -1.89E-03 | -1.89E-03 | 22 | 21 | 20 | -4.54E-04 | 1.86E-01  | 1.86E-01  |
| 23 | 22 | -5.40E-05 | -6.01E-02 | -6.01E-02 | 23 | 22 | 21 | 2.38E-03  | 7.31E-01  | 7.32E-01  |
| 24 | 23 | 1.19E-04  | -1.93E-03 | -5.67E-04 | 24 | 23 | 22 | 2.65E+01  | 4.15E+00  | 1.70E+01  |
| 25 | 23 | -1.25E-04 | -6.82E-04 | -2.05E-03 | 25 | 23 | 22 | -2.65E+01 | -9.44E+00 | -2.23E+01 |
| 26 | 24 | -2.19E-03 | 5.21E-04  | -1.49E-03 | 26 | 24 | 23 | 5.42E-02  | 5.86E-04  | -3.35E-02 |
| 27 | 24 | -1.48E-04 | 3.52E-04  | 1.18E-04  | 27 | 24 | 23 | -2.82E-01 | -2.43E-02 | -1.47E-01 |
| 28 | 25 | 2.19E-03  | 7.02E-04  | 2.71E-03  | 28 | 25 | 23 | -5.54E-02 | -8.80E-02 | -5.40E-02 |
| 29 | 25 | 1.49E-04  | 2.66E-04  | 5.00E-04  | 29 | 25 | 23 | 2.83E-01  | 1.36E-01  | 2.59E-01  |
| 30 | 26 | 1.00E-06  | -4.08E-04 | -4.07E-04 | 30 | 26 | 24 | 3.77E-04  | 4.09E-02  | 4.09E-02  |
| 31 | 26 | -1.06E-04 | 1.85E-05  | 1.44E-04  | 31 | 26 | 24 | 8.16E-04  | -4.17E-02 | -5.31E-02 |
| 32 | 28 | 1.07E-04  | 2.51E-04  | 1.25E-04  | 32 | 28 | 25 | 4.72E-04  | -5.28E-02 | -4.14E-02 |

|    |    |           |           |           |    |    |    |           |           |           |
|----|----|-----------|-----------|-----------|----|----|----|-----------|-----------|-----------|
| 33 | 30 | 2.00E-07  | -1.00E-04 | -1.01E-04 | 33 | 30 | 26 | -1.55E-04 | 6.94E-02  | 6.95E-02  |
| 34 | 20 | 1.04E-05  | 2.38E-03  | 2.38E-03  | 34 | 20 | 13 | 4.29E-03  | 4.27E-01  | 4.27E-01  |
| 35 | 34 | 2.18E-03  | 1.61E-03  | -7.32E-04 | 35 | 34 | 20 | 1.39E+00  | 1.75E+00  | -3.96E-01 |
| 36 | 34 | -2.19E-03 | -2.92E-03 | -5.71E-04 | 36 | 34 | 20 | -1.40E+00 | -1.79E+00 | 3.55E-01  |
| 37 | 35 | 2.30E-04  | 3.09E-04  | 3.13E-04  | 37 | 35 | 34 | 5.73E-02  | 6.90E-02  | -1.44E-02 |
| 38 | 35 | 5.09E-04  | 6.85E-04  | 1.04E-04  | 38 | 35 | 34 | 8.96E-02  | 9.56E-02  | 2.05E-02  |
| 39 | 36 | -2.26E-04 | 8.32E-05  | 8.01E-05  | 39 | 36 | 34 | -5.86E-02 | -7.25E-02 | 1.10E-02  |
| 40 | 36 | -5.11E-04 | -4.08E-04 | 1.73E-04  | 40 | 36 | 34 | -8.93E-02 | -6.87E-02 | 6.38E-03  |
| 41 | 37 | -4.00E-06 | -1.86E-04 | -1.86E-04 | 41 | 39 | 36 | -1.97E-04 | 2.26E-02  | 2.26E-02  |
| 42 | 37 | 1.19E-04  | 1.82E-04  | 8.73E-05  | 42 | 37 | 35 | 6.36E-02  | 4.73E-02  | -1.34E-02 |
| 43 | 39 | -1.20E-04 | -3.20E-05 | 6.29E-05  | 43 | 39 | 36 | -6.31E-02 | -7.67E-02 | -1.60E-02 |
| 44 | 41 | -1.00E-07 | -1.37E-05 | -1.32E-05 | 44 | 41 | 39 | 9.54E-05  | 1.98E-02  | 1.98E-02  |
| 45 | 22 | -1.00E-06 | 1.73E-03  | 1.73E-03  | 45 | 22 | 21 | -5.08E-04 | 9.31E-02  | 9.31E-02  |
| 46 | 21 | -8.10E-06 | 2.86E-03  | 2.86E-03  | 46 | 21 | 20 | -7.23E-04 | -5.38E-02 | -5.38E-02 |
| 47 | 46 | -1.60E-06 | -1.63E-03 | -1.63E-03 | 47 | 46 | 21 | -6.14E-04 | 2.06E-01  | 2.06E-01  |
| 48 | 45 | -3.20E-06 | -1.78E-03 | -1.78E-03 | 48 | 45 | 22 | -2.98E-04 | 1.93E-01  | 1.93E-01  |
| 49 | 45 | -1.90E-06 | -1.92E-04 | -1.94E-04 | 49 | 45 | 22 | 4.74E-04  | -1.14E-03 | -1.12E-03 |
| 50 | 46 | 1.50E-06  | -1.19E-03 | -1.19E-03 | 50 | 46 | 21 | 3.52E-04  | 2.41E-01  | 2.41E-01  |
| 51 | 47 | 1.30E-06  | 1.46E-05  | 1.51E-05  | 51 | 47 | 46 | 4.19E-04  | -5.02E-02 | -5.03E-02 |
| 52 | 48 | -3.00E-07 | -6.70E-06 | -7.30E-06 | 52 | 48 | 45 | 2.81E-04  | 2.36E-02  | 2.35E-02  |
| 53 | 1  | 3.30E-06  | 6.92E-04  | 6.93E-04  | 53 | 1  | 4  | -9.77E-04 | -1.41E+00 | -1.41E+00 |
| 54 | 53 | -2.37E-04 | -1.94E-04 | -6.16E-03 | 54 | 53 | 1  | 2.01E-01  | -5.93E-01 | 2.94E+00  |
| 55 | 53 | 2.45E-04  | -5.92E-03 | 5.00E-05  | 55 | 53 | 1  | -2.00E-01 | 2.75E+00  | -7.91E-01 |
| 56 | 53 | -2.10E-06 | 6.11E-03  | 6.11E-03  | 56 | 53 | 1  | -5.66E-04 | -2.06E+00 | -2.06E+00 |
| 57 | 54 | -3.58E-04 | -4.89E-04 | 3.95E-04  | 57 | 54 | 53 | 7.76E-02  | 7.26E-01  | 7.79E-01  |
| 58 | 54 | -2.60E-04 | 6.53E-04  | -4.48E-05 | 58 | 54 | 53 | -3.51E-01 | -1.48E+00 | 1.85E-02  |

|    |    |           |           |           |    |    |    |           |           |           |
|----|----|-----------|-----------|-----------|----|----|----|-----------|-----------|-----------|
| 59 | 54 | -3.06E-04 | -1.53E-04 | -1.06E-03 | 59 | 54 | 53 | -3.27E-02 | 1.76E-01  | -6.75E-01 |
| 60 | 55 | 3.55E-04  | 7.49E-04  | -1.33E-04 | 60 | 55 | 53 | -7.73E-02 | 7.02E-01  | 6.49E-01  |
| 61 | 55 | 3.07E-04  | -7.48E-04 | 1.53E-04  | 61 | 55 | 53 | 3.21E-02  | -6.44E-01 | 2.07E-01  |
| 62 | 55 | 2.53E-04  | 2.08E-04  | 9.05E-04  | 62 | 55 | 53 | 3.50E-01  | 3.70E-01  | -1.13E+00 |
| 63 | 56 | -1.00E-06 | 9.81E-04  | 9.82E-04  | 63 | 56 | 53 | 2.78E-04  | 4.48E-01  | 4.48E-01  |
| 64 | 56 | -6.59E-05 | -4.67E-04 | -1.42E-03 | 64 | 56 | 53 | -1.16E-01 | -9.72E-01 | 4.52E-01  |
| 65 | 56 | 6.44E-05  | -1.36E-03 | -4.02E-04 | 65 | 56 | 53 | 1.15E-01  | 5.67E-01  | -8.56E-01 |
| 66 | 10 | 3.50E-06  | 8.04E-05  | 8.06E-05  | 66 | 10 | 8  | -3.63E-04 | -1.35E-01 | -1.35E-01 |
| 67 | 66 | -8.26E-04 | -5.74E-04 | -1.17E-04 | 67 | 66 | 10 | 1.17E+00  | 1.30E+00  | -5.25E-02 |
| 68 | 66 | -2.10E-06 | -2.93E-04 | -2.94E-04 | 68 | 66 | 10 | 2.79E-03  | -3.25E-02 | -3.26E-02 |
| 69 | 66 | 8.27E-04  | 7.13E-04  | 2.57E-04  | 69 | 66 | 10 | -1.17E+00 | -1.22E+00 | 1.30E-01  |
| 70 | 67 | -5.60E-04 | -7.75E-04 | 2.36E-04  | 70 | 67 | 66 | 3.64E-01  | 5.25E-01  | -1.32E-01 |
| 71 | 67 | -5.21E-04 | -5.17E-04 | 1.06E-04  | 71 | 67 | 66 | 3.17E-01  | 3.42E-01  | -2.19E-02 |
| 72 | 67 | -3.01E-04 | -3.79E-04 | 1.22E-04  | 72 | 67 | 66 | -1.83E-01 | -2.80E-01 | 2.90E-02  |
| 73 | 68 | -9.57E-04 | -1.76E-03 | 5.25E-05  | 73 | 68 | 66 | -2.52E-02 | -4.11E-02 | -8.33E-02 |
| 74 | 68 | -4.00E-07 | 2.10E-05  | 2.24E-05  | 74 | 68 | 66 | -4.67E-04 | 2.74E-02  | 2.74E-02  |
| 75 | 68 | 9.56E-04  | 1.01E-03  | -7.99E-04 | 75 | 68 | 66 | 2.60E-02  | -5.80E-02 | -1.58E-02 |
| 76 | 69 | 3.01E-04  | 4.23E-04  | -7.72E-05 | 76 | 69 | 66 | 1.84E-01  | 2.13E-01  | -9.57E-02 |
| 77 | 69 | 5.21E-04  | 6.26E-04  | 3.20E-06  | 77 | 69 | 66 | -3.16E-01 | -3.39E-01 | 2.53E-02  |
| 78 | 69 | 5.58E-04  | 7.95E-04  | -2.16E-04 | 78 | 69 | 66 | -3.65E-01 | -4.98E-01 | 1.60E-01  |
| 79 | 3  | 1.40E-06  | -1.79E-03 | -1.80E-03 | 79 | 3  | 1  | 9.86E-05  | -1.80E-01 | -1.80E-01 |
| 80 | 2  | -1.24E-05 | -6.91E-03 | -6.91E-03 | 80 | 2  | 1  | 5.50E-04  | 3.58E-02  | 3.58E-02  |
| 81 | 22 | 6.60E-06  | -1.94E-01 | -1.94E-01 | 81 | 7  | 6  | 5.01E-05  | 2.30E+00  | 2.30E+00  |
| 82 | 7  | -1.60E-06 | 1.93E-01  | 1.93E-01  | 82 | 22 | 21 | 3.57E-04  | -2.16E+00 | -2.16E+00 |

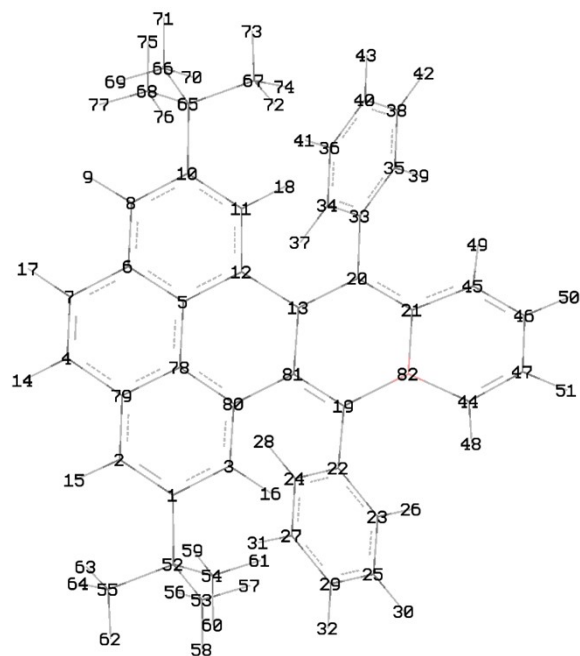

Table S23. Deviations in bond lengths and angles of B-7-MM, B-7-MP, and B-7-PM isomers by comparison with the B-7-PP structure.

| Atom1 | Atom2 | $\Delta r_{MM-PP}$ (Å) | $\Delta r_{PM-PP}$ (Å) | $\Delta r_{MP-PP}$ (Å) | Atom1 | Atom2 | Atom3 | $\Delta A_{MM-PP}$ (°) | $\Delta A_{PM-PP}$ (°) | $\Delta A_{MP-PP}$ (°) |
|-------|-------|------------------------|------------------------|------------------------|-------|-------|-------|------------------------|------------------------|------------------------|
| 2     | 1     | 1.10E-06               | -9.41E-04              | -9.32E-04              | -     | -     | -     | -                      | -                      | -                      |
| 3     | 1     | 7.80E-06               | 8.12E-04               | 8.00E-04               | 3     | 1     | 2     | -3.61E-04              | 3.62E-02               | 3.62E-02               |
| 4     | 2     | 1.30E-05               | -6.61E-03              | -6.63E-03              | 4     | 2     | 1     | -7.67E-04              | -5.91E-01              | -5.91E-01              |
| 5     | 4     | -2.12E-05              | -1.78E-03              | -1.74E-03              | 5     | 4     | 2     | 1.19E-04               | -2.97E-01              | -2.96E-01              |
| 6     | 5     | 2.20E-06               | 1.11E-03               | 1.13E-03               | 6     | 5     | 4     | 8.06E-04               | -1.71E-01              | -1.71E-01              |
| 7     | 4     | 2.11E-05               | -1.02E-03              | -1.01E-03              | 7     | 4     | 2     | -3.07E-04              | -1.09E+00              | -1.09E+00              |
| 8     | 6     | 1.59E-05               | -1.60E-03              | -1.61E-03              | 8     | 6     | 5     | 3.13E-04               | -2.74E-02              | -2.66E-02              |
| 9     | 8     | -2.20E-06              | -1.66E-04              | -1.67E-04              | 9     | 8     | 6     | -2.17E-03              | 1.24E-03               | 5.79E-04               |

|    |    |           |           |           |    |    |    |           |           |           |
|----|----|-----------|-----------|-----------|----|----|----|-----------|-----------|-----------|
| 10 | 8  | -4.50E-06 | 1.92E-04  | 1.93E-04  | 10 | 8  | 6  | -2.59E-04 | -1.70E-01 | -1.71E-01 |
| 11 | 10 | 2.90E-06  | 4.07E-04  | 4.10E-04  | 11 | 10 | 8  | -5.28E-04 | -1.05E-01 | -1.05E-01 |
| 12 | 11 | -3.40E-06 | -2.94E-04 | -2.86E-04 | 12 | 11 | 10 | 1.25E-03  | -1.11E-02 | -9.16E-03 |
| 13 | 12 | -2.87E-05 | 1.65E-03  | 1.67E-03  | 13 | 12 | 11 | -6.21E-04 | 1.17E+00  | 1.17E+00  |
| 14 | 4  | 1.10E-06  | -5.59E-05 | -5.68E-05 | 14 | 4  | 2  | 3.95E-03  | 1.15E-01  | 1.15E-01  |
| 15 | 2  | -1.80E-06 | -1.32E-04 | -1.32E-04 | 15 | 2  | 1  | 1.67E-03  | 1.30E-01  | 1.31E-01  |
| 16 | 3  | 1.48E-05  | -2.17E-03 | -2.17E-03 | 16 | 3  | 1  | 1.50E-03  | -6.10E-01 | -6.12E-01 |
| 17 | 7  | -1.00E-07 | -5.94E-05 | -5.83E-05 | 17 | 7  | 4  | -3.49E-03 | 1.60E-01  | 1.60E-01  |
| 18 | 11 | 6.60E-06  | 3.96E-05  | 3.26E-05  | 18 | 11 | 10 | -1.07E-03 | 5.93E-02  | 5.53E-02  |
| 19 | 13 | 2.16E-05  | 1.45E-02  | 1.44E-02  | 19 | 13 | 12 | -2.04E-03 | 6.92E+00  | 6.92E+00  |
| 20 | 13 | -4.62E-05 | 5.97E-03  | 6.05E-03  | 20 | 13 | 12 | 5.88E-04  | -2.21E+00 | -2.22E+00 |
| 21 | 20 | 2.78E-05  | 2.10E-04  | 1.85E-04  | 21 | 20 | 13 | -2.23E-03 | 1.13E+00  | 1.13E+00  |
| 22 | 19 | -1.31E-05 | 2.40E-03  | 2.36E-03  | 22 | 19 | 13 | 3.04E-03  | 2.44E+00  | 2.43E+00  |
| 23 | 22 | 1.45E-03  | -7.26E-04 | 3.30E-04  | 23 | 22 | 19 | -6.93E-01 | 4.87E-01  | -1.57E+00 |
| 24 | 22 | -1.45E-03 | -1.15E-03 | -2.19E-03 | 24 | 22 | 19 | 6.93E-01  | -8.71E-01 | 1.19E+00  |
| 25 | 23 | -3.53E-03 | -3.46E-04 | -2.47E-03 | 25 | 23 | 22 | 5.51E-02  | -4.19E-02 | -6.10E-02 |
| 26 | 23 | -3.62E-05 | 3.46E-04  | -2.45E-05 | 26 | 23 | 22 | -2.04E-01 | -1.64E-02 | -1.84E-01 |
| 27 | 24 | 3.53E-03  | 1.08E-03  | 3.20E-03  | 27 | 24 | 22 | -5.37E-02 | -1.16E-01 | -9.69E-02 |
| 28 | 24 | 4.36E-05  | 1.59E-05  | 3.84E-04  | 28 | 24 | 22 | 2.03E-01  | 2.21E-02  | 1.89E-01  |
| 29 | 25 | 1.20E-06  | 5.37E-04  | 5.20E-04  | 29 | 25 | 23 | 1.87E-04  | 7.72E-03  | 8.43E-03  |
| 30 | 25 | -2.60E-05 | 1.55E-05  | 5.90E-06  | 30 | 25 | 23 | 1.90E-02  | -3.24E-03 | -3.55E-02 |
| 31 | 27 | 2.54E-05  | 3.16E-05  | 4.19E-05  | 31 | 27 | 24 | -2.00E-02 | -5.64E-02 | -2.36E-02 |
| 32 | 29 | -6.00E-07 | -1.25E-04 | -1.23E-04 | 32 | 29 | 25 | 8.08E-04  | 1.82E-03  | 1.80E-03  |
| 33 | 20 | -3.73E-05 | 4.38E-03  | 4.38E-03  | 33 | 20 | 13 | 2.09E-04  | 1.05E+00  | 1.04E+00  |
| 34 | 33 | 8.19E-04  | -3.36E-04 | -1.13E-03 | 34 | 33 | 20 | 1.02E+00  | 1.23E+00  | -3.30E-01 |
| 35 | 33 | -8.12E-04 | -1.95E-03 | -1.15E-03 | 35 | 33 | 20 | -1.02E+00 | -1.34E+00 | 2.15E-01  |

|    |    |           |           |           |    |    |    |           |           |           |
|----|----|-----------|-----------|-----------|----|----|----|-----------|-----------|-----------|
| 36 | 34 | 1.21E-03  | 1.59E-03  | 3.63E-04  | 36 | 34 | 33 | 4.17E-02  | 5.72E-02  | -2.00E-02 |
| 37 | 34 | 3.93E-05  | 3.54E-04  | 1.70E-04  | 37 | 34 | 33 | -9.08E-02 | -9.13E-02 | -3.95E-03 |
| 38 | 35 | -1.22E-03 | -8.53E-04 | 3.81E-04  | 38 | 35 | 33 | -3.89E-02 | -6.09E-02 | 1.66E-02  |
| 39 | 35 | -3.26E-05 | 1.35E-04  | 3.16E-04  | 39 | 35 | 33 | 8.92E-02  | 8.73E-02  | 3.75E-04  |
| 40 | 38 | -3.50E-06 | -1.69E-04 | -1.66E-04 | 40 | 38 | 35 | 6.78E-04  | 4.71E-04  | 9.19E-04  |
| 41 | 36 | 1.54E-04  | 2.35E-04  | 1.82E-04  | 41 | 36 | 34 | 1.83E-02  | 7.11E-03  | -3.22E-02 |
| 42 | 38 | -1.52E-04 | 2.92E-05  | 8.47E-05  | 42 | 38 | 35 | -2.02E-02 | -5.16E-02 | -1.20E-02 |
| 43 | 40 | -1.90E-06 | -9.80E-06 | -8.80E-06 | 43 | 40 | 38 | 4.71E-05  | 3.73E-02  | 3.76E-02  |
| 44 | 21 | -7.40E-06 | 4.69E-03  | 4.64E-03  | 44 | 21 | 20 | 2.19E-03  | 1.14E+00  | 1.14E+00  |
| 45 | 21 | -3.78E-05 | 2.00E-03  | 2.02E-03  | 45 | 21 | 20 | -1.38E-03 | -1.72E-01 | -1.72E-01 |
| 46 | 45 | 2.75E-05  | -8.50E-04 | -8.57E-04 | 46 | 45 | 21 | 1.38E-03  | 3.10E-01  | 3.09E-01  |
| 47 | 44 | 1.41E-05  | -1.11E-03 | -1.10E-03 | 47 | 44 | 21 | 7.36E-04  | 1.95E-01  | 1.95E-01  |
| 48 | 44 | 1.20E-06  | -9.05E-04 | -9.04E-04 | 48 | 44 | 21 | 2.05E-03  | 3.89E-01  | 3.93E-01  |
| 49 | 45 | 4.00E-06  | -1.26E-03 | -1.27E-03 | 49 | 45 | 21 | 4.52E-03  | 2.27E-01  | 2.28E-01  |
| 50 | 46 | -6.00E-07 | 8.00E-06  | 8.50E-06  | 50 | 46 | 45 | -4.93E-03 | -1.20E-01 | -1.19E-01 |
| 51 | 47 | -1.50E-06 | -6.93E-05 | -6.89E-05 | 51 | 47 | 44 | -4.63E-03 | -8.51E-05 | -2.18E-03 |
| 52 | 1  | -3.60E-06 | 3.44E-04  | 3.48E-04  | 52 | 1  | 2  | 1.28E-03  | -2.72E-01 | -2.73E-01 |
| 53 | 52 | -2.89E-04 | -1.57E-03 | -6.88E-05 | 53 | 52 | 1  | 7.11E-02  | 3.30E-01  | -1.77E-01 |
| 54 | 52 | 2.74E-04  | 2.12E-04  | -1.29E-03 | 54 | 52 | 1  | -7.27E-02 | -2.48E-01 | 2.61E-01  |
| 55 | 52 | 1.16E-05  | 7.54E-05  | 7.59E-05  | 55 | 52 | 1  | 3.65E-03  | 1.60E-02  | 1.49E-02  |
| 56 | 53 | -4.11E-04 | 3.43E-05  | -4.37E-04 | 56 | 53 | 52 | 1.72E-02  | 1.33E-01  | 6.05E-02  |
| 57 | 53 | -3.98E-04 | -9.28E-04 | -1.73E-04 | 57 | 53 | 52 | -3.73E-01 | -2.20E-01 | -4.58E-01 |
| 58 | 53 | -2.99E-04 | 8.86E-05  | -2.36E-04 | 58 | 53 | 52 | -1.51E-02 | 3.02E-02  | -1.59E-02 |
| 59 | 54 | 4.12E-04  | -2.28E-05 | 4.47E-04  | 59 | 54 | 52 | -1.71E-02 | 4.36E-02  | 1.17E-01  |
| 60 | 54 | 2.99E-04  | 5.89E-05  | 3.87E-04  | 60 | 54 | 52 | 1.57E-02  | -1.74E-03 | 4.40E-02  |
| 61 | 54 | 3.98E-04  | 2.25E-04  | -5.28E-04 | 61 | 54 | 52 | 3.69E-01  | -8.52E-02 | 1.53E-01  |

|    |    |           |           |           |    |    |    |           |           |           |
|----|----|-----------|-----------|-----------|----|----|----|-----------|-----------|-----------|
| 62 | 55 | -3.00E-07 | -1.70E-05 | -1.69E-05 | 62 | 55 | 52 | -1.28E-03 | -4.26E-02 | -4.22E-02 |
| 63 | 55 | -2.10E-06 | -7.63E-05 | 6.84E-05  | 63 | 55 | 52 | -1.08E-01 | 6.62E-02  | -1.19E-01 |
| 64 | 55 | -4.50E-06 | 6.43E-05  | -7.83E-05 | 64 | 55 | 52 | 1.07E-01  | -1.07E-02 | 1.74E-01  |
| 65 | 10 | -4.00E-06 | 7.28E-05  | 7.58E-05  | 65 | 10 | 8  | 4.46E-03  | -1.48E-01 | -1.49E-01 |
| 66 | 65 | -1.06E-03 | -6.41E-04 | -2.88E-04 | 66 | 65 | 10 | 1.02E+00  | 1.19E+00  | -8.25E-02 |
| 67 | 65 | -8.70E-06 | -4.44E-04 | -4.42E-04 | 67 | 65 | 10 | -4.34E-03 | -4.76E-02 | -4.57E-02 |
| 68 | 65 | 1.07E-03  | 7.76E-04  | 4.26E-04  | 68 | 65 | 10 | -1.01E+00 | -1.09E+00 | 1.78E-01  |
| 69 | 66 | -3.30E-04 | -6.06E-04 | 3.36E-04  | 69 | 66 | 65 | 2.00E-01  | 4.12E-01  | -1.78E-01 |
| 70 | 66 | -4.34E-04 | -3.97E-04 | 6.24E-05  | 70 | 66 | 65 | 3.09E-01  | 3.30E-01  | -5.35E-02 |
| 71 | 66 | -2.13E-04 | -2.79E-04 | 1.79E-04  | 71 | 66 | 65 | -9.43E-02 | -2.19E-01 | 4.11E-02  |
| 72 | 67 | -6.83E-04 | -1.74E-03 | 6.92E-05  | 72 | 67 | 65 | -1.13E-01 | -1.48E-01 | -1.36E-01 |
| 73 | 67 | -3.00E-06 | 3.82E-05  | 3.77E-05  | 73 | 67 | 65 | -4.02E-04 | 2.94E-02  | 2.90E-02  |
| 74 | 67 | 6.84E-04  | 7.47E-04  | -1.07E-03 | 74 | 67 | 65 | 1.11E-01  | -2.42E-02 | -3.58E-02 |
| 75 | 68 | 2.12E-04  | 3.87E-04  | -6.94E-05 | 75 | 68 | 65 | 9.38E-02  | 1.33E-01  | -1.27E-01 |
| 76 | 68 | 4.36E-04  | 4.93E-04  | 3.69E-05  | 76 | 68 | 65 | -3.09E-01 | -3.63E-01 | 2.13E-02  |
| 77 | 68 | 3.27E-04  | 6.55E-04  | -2.83E-04 | 77 | 68 | 65 | -2.01E-01 | -3.75E-01 | 2.15E-01  |
| 78 | 5  | -2.01E-05 | -9.37E-04 | -9.60E-04 | 78 | 5  | 4  | -5.84E-04 | 2.28E-01  | 2.27E-01  |
| 79 | 2  | 1.27E-05  | -1.51E-03 | -1.53E-03 | 79 | 2  | 1  | 8.23E-04  | -2.89E-01 | -2.89E-01 |
| 80 | 3  | -1.52E-05 | 1.92E-03  | 1.94E-03  | 80 | 3  | 1  | -3.73E-04 | 2.76E-01  | 2.77E-01  |
| 81 | 19 | -4.37E-05 | 5.84E-03  | 5.91E-03  | 81 | 19 | 13 | 3.24E-04  | -3.62E-01 | -3.63E-01 |
| 82 | 44 | -4.30E-06 | 7.56E-04  | 7.59E-04  | 82 | 44 | 21 | 1.04E-03  | -2.58E-01 | -2.58E-01 |

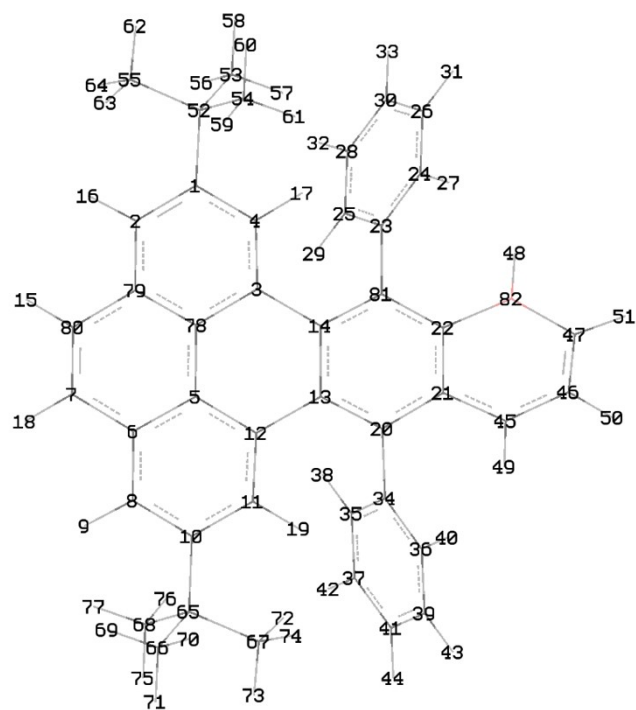

Table S24. Deviations in bond lengths and angles of B-8-MM, B-8-MP, and B-8-PM isomers by comparison with the B-8-PP structure.

| Atom1 | Atom2 | $\Delta r_{MM-PP}$ (Å) | $\Delta r_{PM-PP}$ (Å) | $\Delta r_{MP-PP}$ (Å) | Atom1 | Atom2 | Atom3 | $\Delta A_{MM-PP}$ (°) | $\Delta A_{PM-PP}$ (°) | $\Delta A_{MP-PP}$ (°) |
|-------|-------|------------------------|------------------------|------------------------|-------|-------|-------|------------------------|------------------------|------------------------|
| 2     | 1     | 1.22E-05               | 4.38E-03               | 4.37E-03               | -     | -     | -     | -                      | -                      | -                      |
| 3     | 1     | 5.00E-07               | -3.37E-03              | -3.37E-03              | 3     | 1     | 2     | -3.50E-04              | -3.79E-01              | -3.79E-01              |
| 4     | 3     | 1.15E-05               | 4.52E-03               | 4.51E-03               | 4     | 3     | 1     | -2.89E-04              | 1.03E-01               | 1.03E-01               |
| 5     | 3     | -2.20E-06              | -7.23E-03              | -7.24E-03              | 5     | 3     | 1     | 4.55E-04               | -7.53E-01              | -7.53E-01              |
| 6     | 5     | 3.20E-06               | -1.25E-03              | -1.25E-03              | 6     | 5     | 3     | -5.03E-04              | -4.09E-01              | -4.10E-01              |
| 7     | 6     | 1.34E-05               | 1.54E-03               | 1.55E-03               | 7     | 6     | 5     | -3.50E-04              | 1.88E-01               | 1.88E-01               |
| 8     | 6     | -1.17E-05              | -5.63E-04              | -5.68E-04              | 8     | 6     | 5     | 7.76E-04               | -9.03E-03              | -9.14E-03              |

|    |    |           |           |           |    |    |    |           |           |           |
|----|----|-----------|-----------|-----------|----|----|----|-----------|-----------|-----------|
| 9  | 8  | -3.00E-07 | -2.62E-04 | -2.62E-04 | 9  | 8  | 6  | 4.90E-04  | 4.19E-02  | 4.25E-02  |
| 10 | 8  | 1.33E-05  | -1.04E-03 | -1.04E-03 | 10 | 8  | 6  | -3.50E-04 | -2.91E-01 | -2.91E-01 |
| 11 | 10 | -8.30E-06 | 1.75E-03  | 1.74E-03  | 11 | 10 | 8  | -2.13E-04 | 3.63E-02  | 3.65E-02  |
| 12 | 11 | 1.24E-05  | 3.52E-04  | 3.56E-04  | 12 | 11 | 10 | 5.55E-04  | 9.46E-02  | 9.42E-02  |
| 13 | 12 | 7.10E-06  | 4.95E-03  | 4.94E-03  | 13 | 12 | 11 | -4.32E-04 | 1.88E+00  | 1.88E+00  |
| 14 | 13 | -1.87E-05 | 8.78E-03  | 8.78E-03  | 14 | 13 | 12 | 9.48E-04  | 4.54E-01  | 4.54E-01  |
| 15 | 7  | -3.70E-06 | 4.25E-04  | 4.28E-04  | 15 | 7  | 6  | 5.68E-04  | -3.12E-01 | -3.12E-01 |
| 16 | 2  | 1.10E-06  | 1.85E-03  | 1.85E-03  | 16 | 2  | 1  | -3.63E-04 | -4.79E-01 | -4.79E-01 |
| 17 | 4  | -9.20E-06 | -2.28E-03 | -2.27E-03 | 17 | 4  | 3  | 9.15E-04  | -2.65E-01 | -2.65E-01 |
| 18 | 7  | 1.90E-06  | -3.61E-05 | -3.72E-05 | 18 | 7  | 6  | -3.77E-04 | 1.65E-02  | 1.61E-02  |
| 19 | 11 | -6.10E-06 | -1.65E-03 | -1.65E-03 | 19 | 11 | 10 | -6.81E-04 | -3.39E-01 | -3.38E-01 |
| 20 | 13 | 2.57E-05  | -1.06E-03 | -1.06E-03 | 20 | 13 | 12 | -1.00E-03 | -1.24E+00 | -1.24E+00 |
| 21 | 20 | -1.63E-05 | 2.66E-03  | 2.65E-03  | 21 | 20 | 13 | 6.91E-04  | 1.01E+00  | 1.01E+00  |
| 22 | 21 | 1.36E-05  | -4.34E-03 | -4.35E-03 | 22 | 21 | 20 | -1.80E-03 | 5.47E-01  | 5.49E-01  |
| 23 | 22 | -9.71E-05 | -2.22E-02 | -2.22E-02 | 23 | 22 | 21 | 4.04E-03  | 1.24E+00  | 1.24E+00  |
| 24 | 23 | -3.03E-04 | -1.85E-03 | -2.40E-03 | 24 | 23 | 22 | 2.71E+01  | 3.58E+00  | 2.06E+01  |
| 25 | 23 | 3.02E-04  | -2.09E-03 | -1.54E-03 | 25 | 23 | 22 | -2.71E+01 | -6.53E+00 | -2.35E+01 |
| 26 | 24 | -1.02E-03 | -1.20E-04 | -2.47E-04 | 26 | 24 | 23 | -1.09E-01 | -5.75E-02 | -2.31E-01 |
| 27 | 24 | -4.45E-04 | -1.13E-04 | -2.69E-04 | 27 | 24 | 23 | 2.87E-02  | 3.48E-03  | 1.27E-01  |
| 28 | 25 | 1.03E-03  | 7.70E-04  | 8.91E-04  | 28 | 25 | 23 | 1.07E-01  | -1.24E-01 | 5.08E-02  |
| 29 | 25 | 4.47E-04  | 1.74E-04  | 3.30E-04  | 29 | 25 | 23 | -2.88E-02 | 9.83E-02  | -2.55E-02 |
| 30 | 26 | -3.10E-06 | 1.22E-04  | 1.23E-04  | 30 | 26 | 24 | -2.08E-04 | -1.35E-03 | -1.31E-03 |
| 31 | 26 | -1.23E-05 | 8.16E-05  | 2.80E-04  | 31 | 26 | 24 | -4.63E-02 | 2.61E-02  | -5.18E-02 |
| 32 | 28 | 1.47E-05  | 2.95E-04  | 9.53E-05  | 32 | 28 | 25 | 4.70E-02  | -5.05E-03 | 7.26E-02  |
| 33 | 30 | 2.70E-06  | 2.40E-05  | 2.39E-05  | 33 | 30 | 26 | -1.48E-04 | 3.49E-02  | 3.51E-02  |
| 34 | 20 | -3.10E-06 | 5.27E-03  | 5.26E-03  | 34 | 20 | 13 | 1.92E-04  | 1.61E+00  | 1.61E+00  |

|    |    |           |           |           |    |    |    |           |           |           |
|----|----|-----------|-----------|-----------|----|----|----|-----------|-----------|-----------|
| 35 | 34 | 1.46E-03  | -2.47E-05 | -2.09E-03 | 35 | 34 | 20 | 1.33E+00  | 1.01E+00  | -4.33E-02 |
| 36 | 34 | -1.46E-03 | -3.56E-03 | -1.49E-03 | 36 | 34 | 20 | -1.33E+00 | -1.37E+00 | -3.23E-01 |
| 37 | 35 | 9.66E-04  | 1.43E-03  | 1.54E-03  | 37 | 35 | 34 | 9.35E-02  | 1.52E-02  | -1.13E-01 |
| 38 | 35 | 5.84E-04  | 7.02E-04  | 1.01E-04  | 38 | 35 | 34 | 3.44E-02  | 3.05E-02  | 5.02E-02  |
| 39 | 36 | -9.60E-04 | 5.81E-04  | 4.76E-04  | 39 | 36 | 34 | -9.37E-02 | -2.07E-01 | -7.84E-02 |
| 40 | 36 | -5.84E-04 | -4.84E-04 | 1.17E-04  | 40 | 36 | 34 | -3.47E-02 | 1.58E-02  | -3.92E-03 |
| 41 | 39 | -5.30E-06 | 3.36E-04  | 3.35E-04  | 41 | 39 | 36 | -2.15E-05 | 1.94E-03  | 2.05E-03  |
| 42 | 37 | 5.05E-05  | 8.04E-05  | 1.67E-04  | 42 | 37 | 35 | 6.10E-02  | 7.70E-02  | -7.00E-03 |
| 43 | 39 | -4.82E-05 | 1.17E-04  | 3.12E-05  | 43 | 39 | 36 | -6.13E-02 | -6.83E-02 | 1.57E-02  |
| 44 | 41 | 2.40E-06  | -5.27E-05 | -5.29E-05 | 44 | 41 | 39 | -6.07E-05 | 1.36E-02  | 1.35E-02  |
| 45 | 21 | 2.67E-05  | 4.53E-03  | 4.54E-03  | 45 | 21 | 20 | 3.30E-03  | -7.81E-01 | -7.82E-01 |
| 46 | 45 | -3.50E-06 | -1.34E-03 | -1.35E-03 | 46 | 45 | 21 | -1.48E-04 | 5.01E-01  | 5.01E-01  |
| 47 | 46 | 2.40E-06  | -1.80E-03 | -1.80E-03 | 47 | 46 | 45 | 7.47E-04  | 1.90E-02  | 1.85E-02  |
| 48 | 47 | 5.18E-05  | -1.43E-02 | -1.43E-02 | 48 | 47 | 46 | -6.00E-04 | 1.56E-01  | 1.57E-01  |
| 49 | 45 | 9.00E-07  | -1.43E-03 | -1.43E-03 | 49 | 45 | 21 | -1.64E-03 | 3.40E-01  | 3.39E-01  |
| 50 | 46 | 3.90E-06  | 4.23E-05  | 4.22E-05  | 50 | 46 | 45 | -8.44E-04 | -1.21E-01 | -1.20E-01 |
| 51 | 47 | 2.90E-06  | -5.60E-05 | -5.65E-05 | 51 | 47 | 46 | 1.47E-03  | 1.61E-01  | 1.61E-01  |
| 52 | 1  | 3.60E-06  | 1.25E-03  | 1.25E-03  | 52 | 1  | 2  | 7.46E-04  | -3.35E+00 | -3.35E+00 |
| 53 | 52 | 5.04E-04  | 5.23E-04  | -6.15E-03 | 53 | 52 | 1  | 3.08E-01  | -5.76E-01 | 3.07E+00  |
| 54 | 52 | -5.02E-04 | -6.64E-03 | 3.47E-05  | 54 | 52 | 1  | -3.08E-01 | 2.76E+00  | -8.85E-01 |
| 55 | 52 | 0.00E+00  | 6.12E-03  | 6.11E-03  | 55 | 52 | 1  | 3.22E-04  | -2.02E+00 | -2.02E+00 |
| 56 | 53 | -4.27E-04 | -5.64E-04 | 4.47E-04  | 56 | 53 | 52 | 5.97E-02  | 6.70E-01  | 7.62E-01  |
| 57 | 53 | 2.88E-04  | 1.31E-03  | -6.82E-05 | 57 | 53 | 52 | -2.87E-02 | -1.35E+00 | 3.58E-03  |
| 58 | 53 | -4.29E-04 | -1.22E-04 | -1.19E-03 | 58 | 53 | 52 | -1.37E-01 | 1.16E-01  | -7.46E-01 |
| 59 | 54 | 4.30E-04  | 8.75E-04  | -1.38E-04 | 59 | 54 | 52 | -5.92E-02 | 7.03E-01  | 6.10E-01  |
| 60 | 54 | 4.32E-04  | -7.57E-04 | 3.06E-04  | 60 | 54 | 52 | 1.36E-01  | -6.10E-01 | 2.52E-01  |

|    |    |           |           |           |    |    |    |           |           |           |
|----|----|-----------|-----------|-----------|----|----|----|-----------|-----------|-----------|
| 61 | 54 | -2.78E-04 | -3.51E-04 | 1.03E-03  | 61 | 54 | 52 | 2.79E-02  | 3.21E-02  | -1.33E+00 |
| 62 | 55 | 2.40E-06  | 9.64E-04  | 9.64E-04  | 62 | 55 | 52 | 2.07E-04  | 4.48E-01  | 4.48E-01  |
| 63 | 55 | -1.02E-04 | -4.07E-04 | -1.58E-03 | 63 | 55 | 52 | -7.98E-02 | -9.46E-01 | 4.89E-01  |
| 64 | 55 | 1.06E-04  | -1.47E-03 | -3.02E-04 | 64 | 55 | 52 | 7.98E-02  | 5.67E-01  | -8.66E-01 |
| 65 | 10 | 9.70E-06  | 2.06E-04  | 2.06E-04  | 65 | 10 | 8  | 5.66E-05  | -5.84E-02 | -5.98E-02 |
| 66 | 65 | -9.54E-04 | -8.08E-04 | -1.81E-04 | 66 | 65 | 10 | 9.38E-01  | 1.31E+00  | -2.63E-01 |
| 67 | 65 | -1.20E-06 | -4.61E-04 | -4.65E-04 | 67 | 65 | 10 | -9.86E-04 | -7.02E-02 | -6.92E-02 |
| 68 | 65 | 9.50E-04  | 7.86E-04  | 1.56E-04  | 68 | 65 | 10 | -9.36E-01 | -1.20E+00 | 3.71E-01  |
| 69 | 66 | -3.24E-04 | -7.04E-04 | 3.71E-04  | 69 | 66 | 65 | 1.99E-01  | 5.04E-01  | -2.41E-01 |
| 70 | 66 | -4.30E-04 | -4.06E-04 | 2.02E-04  | 70 | 66 | 65 | 2.64E-01  | 2.77E-01  | -6.57E-02 |
| 71 | 66 | -1.86E-04 | -3.29E-04 | 1.70E-04  | 71 | 66 | 65 | -9.75E-02 | -2.65E-01 | 1.24E-01  |
| 72 | 67 | -6.41E-04 | -1.93E-03 | 1.55E-04  | 72 | 67 | 65 | -7.91E-02 | -5.19E-02 | -1.18E-01 |
| 73 | 67 | 2.40E-06  | 6.73E-05  | 6.84E-05  | 73 | 67 | 65 | 4.39E-04  | 3.49E-02  | 3.47E-02  |
| 74 | 67 | 6.46E-04  | 8.00E-04  | -1.29E-03 | 74 | 67 | 65 | 7.91E-02  | -3.96E-02 | 2.70E-02  |
| 75 | 68 | 1.94E-04  | 3.61E-04  | -1.39E-04 | 75 | 68 | 65 | 9.72E-02  | 2.22E-01  | -1.67E-01 |
| 76 | 68 | 4.29E-04  | 6.30E-04  | 2.38E-05  | 76 | 68 | 65 | -2.62E-01 | -3.29E-01 | 1.17E-02  |
| 77 | 68 | 3.29E-04  | 7.02E-04  | -3.78E-04 | 77 | 68 | 65 | -2.00E-01 | -4.44E-01 | 3.03E-01  |
| 78 | 3  | -1.05E-05 | -3.92E-03 | -3.93E-03 | 78 | 3  | 1  | 3.19E-04  | 1.17E-02  | 1.18E-02  |
| 79 | 2  | -1.38E-05 | -5.48E-03 | -5.48E-03 | 79 | 2  | 1  | -2.87E-04 | 1.25E-01  | 1.25E-01  |
| 80 | 7  | -7.00E-06 | -1.25E-03 | -1.25E-03 | 80 | 7  | 6  | 4.93E-04  | -1.91E-01 | -1.91E-01 |
| 81 | 22 | -1.09E-05 | 2.97E-03  | 2.96E-03  | 81 | 22 | 21 | 5.19E-04  | 3.71E-01  | 3.70E-01  |
| 82 | 47 | -3.60E-06 | -1.78E-03 | -1.79E-03 | 82 | 47 | 46 | -8.39E-04 | -1.66E-01 | -1.65E-01 |

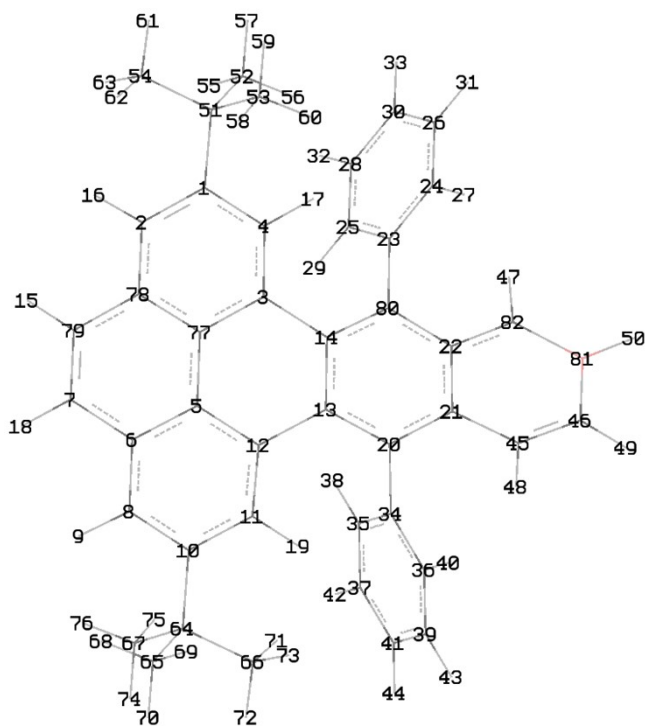

Table S25. Deviations in bond lengths and angles of B-9-*MM*, B-9-*MP*, and B-9-*PM* isomers by comparison with the B-9-*PP* structure.

| Atom1 | Atom2 | $\Delta r_{MM-PP}$ (Å) | $\Delta r_{PM-PP}$ (Å) | $\Delta r_{MP-PP}$ (Å) | Atom1 | Atom2 | Atom3 | $\Delta A_{MM-PP}$ (°) | $\Delta A_{PM-PP}$ (°) | $\Delta A_{MP-PP}$ (°) |
|-------|-------|------------------------|------------------------|------------------------|-------|-------|-------|------------------------|------------------------|------------------------|
| 2     | 1     | 5.40E-06               | 4.02E-03               | 4.01E-03               | -     | -     | -     | -                      | -                      | -                      |
| 3     | 1     | -1.75E-05              | -1.55E-03              | -1.55E-03              | 3     | 1     | 2     | -1.13E-04              | -2.98E-01              | -2.98E-01              |
| 4     | 3     | 8.50E-06               | 5.15E-03               | 5.14E-03               | 4     | 3     | 1     | 2.04E-04               | 4.49E-02               | 4.49E-02               |
| 5     | 3     | -7.60E-06              | -6.04E-03              | -6.05E-03              | 5     | 3     | 1     | 5.29E-04               | -9.46E-01              | -9.46E-01              |
| 6     | 5     | -3.80E-06              | -1.10E-03              | -1.10E-03              | 6     | 5     | 3     | -8.92E-04              | -3.45E-01              | -3.46E-01              |
| 7     | 6     | 1.06E-05               | 1.46E-03               | 1.45E-03               | 7     | 6     | 5     | 2.72E-04               | 1.12E-01               | 1.13E-01               |

|    |    |           |           |           |    |    |    |           |           |           |
|----|----|-----------|-----------|-----------|----|----|----|-----------|-----------|-----------|
| 8  | 6  | -1.19E-05 | -6.45E-04 | -6.41E-04 | 8  | 6  | 5  | 7.71E-04  | -4.73E-02 | -4.73E-02 |
| 9  | 8  | 6.00E-07  | -2.85E-04 | -2.82E-04 | 9  | 8  | 6  | 8.76E-04  | 4.18E-02  | 4.17E-02  |
| 10 | 8  | 4.90E-06  | -7.02E-04 | -7.01E-04 | 10 | 8  | 6  | -5.93E-04 | -2.83E-01 | -2.84E-01 |
| 11 | 10 | -9.70E-06 | 1.72E-03  | 1.72E-03  | 11 | 10 | 8  | 4.90E-04  | 4.83E-03  | 4.79E-03  |
| 12 | 11 | 7.00E-06  | -3.68E-04 | -3.67E-04 | 12 | 11 | 10 | 2.65E-04  | 1.02E-02  | 1.04E-02  |
| 13 | 12 | 2.00E-07  | 5.03E-03  | 5.02E-03  | 13 | 12 | 11 | -4.50E-04 | 1.89E+00  | 1.89E+00  |
| 14 | 13 | -1.84E-05 | 7.67E-03  | 7.70E-03  | 14 | 13 | 12 | 1.58E-03  | 5.48E-01  | 5.48E-01  |
| 15 | 7  | -5.90E-06 | 2.87E-04  | 2.93E-04  | 15 | 7  | 6  | 3.15E-04  | -3.53E-01 | -3.54E-01 |
| 16 | 2  | 1.30E-06  | 1.83E-03  | 1.83E-03  | 16 | 2  | 1  | -4.23E-04 | -4.44E-01 | -4.43E-01 |
| 17 | 4  | -3.80E-06 | -2.93E-03 | -2.93E-03 | 17 | 4  | 3  | 4.30E-04  | -1.71E-01 | -1.69E-01 |
| 18 | 7  | 5.00E-07  | -3.22E-05 | -3.36E-05 | 18 | 7  | 6  | -7.09E-04 | 5.37E-02  | 5.36E-02  |
| 19 | 11 | -6.40E-06 | -9.77E-04 | -9.89E-04 | 19 | 11 | 10 | -6.71E-04 | -1.74E-01 | -1.75E-01 |
| 20 | 13 | 1.82E-05  | -2.41E-03 | -2.43E-03 | 20 | 13 | 12 | 8.67E-05  | -1.54E+00 | -1.54E+00 |
| 21 | 20 | -1.83E-05 | 4.30E-03  | 4.31E-03  | 21 | 20 | 13 | 9.46E-04  | 1.07E+00  | 1.07E+00  |
| 22 | 21 | 8.50E-06  | -5.44E-03 | -5.44E-03 | 22 | 21 | 20 | 2.62E-04  | 5.31E-01  | 5.32E-01  |
| 23 | 22 | -8.13E-05 | -2.61E-02 | -2.61E-02 | 23 | 22 | 21 | 1.39E-03  | 1.39E+00  | 1.39E+00  |
| 24 | 23 | -1.86E-03 | -1.87E-03 | -3.83E-03 | 24 | 23 | 22 | 2.58E+01  | 4.30E+00  | 1.85E+01  |
| 25 | 23 | 1.85E-03  | -1.97E-03 | -9.00E-07 | 25 | 23 | 22 | -2.58E+01 | -7.36E+00 | -2.15E+01 |
| 26 | 24 | -5.01E-04 | 3.07E-04  | 3.49E-04  | 26 | 24 | 23 | -4.81E-02 | -4.44E-02 | -1.71E-01 |
| 27 | 24 | -4.81E-04 | 1.01E-04  | -3.52E-04 | 27 | 24 | 23 | -5.87E-02 | 2.94E-03  | 3.88E-02  |
| 28 | 25 | 4.99E-04  | 8.33E-04  | 7.92E-04  | 28 | 25 | 23 | 4.67E-02  | -1.23E-01 | 3.10E-03  |
| 29 | 25 | 4.79E-04  | 1.30E-04  | 5.82E-04  | 29 | 25 | 23 | 5.91E-02  | 9.70E-02  | 6.16E-02  |
| 30 | 28 | 8.00E-06  | 1.70E-04  | 1.76E-04  | 30 | 28 | 25 | -1.15E-04 | -1.37E-01 | -1.37E-01 |
| 31 | 26 | -4.61E-05 | 5.55E-05  | 1.91E-04  | 31 | 26 | 24 | -3.46E-02 | 2.52E-02  | -4.50E-02 |
| 32 | 28 | 4.53E-05  | 2.37E-04  | 1.00E-04  | 32 | 28 | 25 | 3.44E-02  | -1.00E-02 | 5.97E-02  |
| 33 | 30 | 4.00E-07  | -6.90E-06 | -7.20E-06 | 33 | 30 | 28 | -5.85E-04 | 1.12E-02  | 1.11E-02  |

|    |    |           |           |           |    |    |    |           |           |           |
|----|----|-----------|-----------|-----------|----|----|----|-----------|-----------|-----------|
| 34 | 20 | -3.10E-06 | 4.66E-03  | 4.68E-03  | 34 | 20 | 13 | 5.20E-04  | 1.55E+00  | 1.55E+00  |
| 35 | 34 | 1.60E-03  | 2.55E-04  | -2.03E-03 | 35 | 34 | 20 | 1.51E+00  | 1.10E+00  | 8.86E-02  |
| 36 | 34 | -1.60E-03 | -3.63E-03 | -1.35E-03 | 36 | 34 | 20 | -1.51E+00 | -1.42E+00 | -4.14E-01 |
| 37 | 35 | 4.42E-04  | 8.24E-04  | 1.27E-03  | 37 | 35 | 34 | 7.95E-02  | 1.55E-02  | -1.17E-01 |
| 38 | 35 | 4.23E-04  | 5.65E-04  | 7.63E-05  | 38 | 35 | 34 | -1.71E-02 | -3.92E-02 | 3.54E-02  |
| 39 | 36 | -4.43E-04 | 8.23E-04  | 3.85E-04  | 39 | 36 | 34 | -8.07E-02 | -1.96E-01 | -6.46E-02 |
| 40 | 36 | -4.25E-04 | -3.45E-04 | 1.39E-04  | 40 | 36 | 34 | 1.71E-02  | 5.18E-02  | -2.22E-02 |
| 41 | 39 | -4.00E-06 | 2.59E-04  | 2.59E-04  | 41 | 39 | 36 | -1.13E-04 | 1.59E-01  | 1.59E-01  |
| 42 | 37 | 5.33E-05  | 9.11E-05  | 2.02E-04  | 42 | 37 | 35 | 3.08E-02  | 6.17E-02  | -1.06E-02 |
| 43 | 39 | -5.39E-05 | 1.48E-04  | 3.71E-05  | 43 | 39 | 36 | -3.06E-02 | -4.12E-02 | 3.08E-02  |
| 44 | 41 | 1.40E-06  | -4.68E-05 | -4.67E-05 | 44 | 41 | 39 | -6.37E-04 | 1.15E-02  | 1.14E-02  |
| 45 | 21 | 2.03E-05  | 3.85E-03  | 3.87E-03  | 45 | 21 | 20 | 5.03E-04  | -8.12E-01 | -8.12E-01 |
| 46 | 45 | -5.70E-06 | -4.53E-04 | -4.55E-04 | 46 | 45 | 21 | 6.24E-04  | 6.85E-01  | 6.86E-01  |
| 47 | 22 | -2.00E-06 | 7.23E-03  | 7.23E-03  | 47 | 22 | 21 | 6.90E-05  | 2.86E-01  | 2.86E-01  |
| 48 | 45 | 2.80E-06  | -1.88E-03 | -1.89E-03 | 48 | 45 | 21 | -2.36E-03 | 2.90E-01  | 2.90E-01  |
| 49 | 46 | -1.00E-07 | -2.89E-05 | -3.05E-05 | 49 | 46 | 45 | 5.65E-04  | -2.05E-01 | -2.05E-01 |
| 50 | 46 | 1.45E-05  | -1.73E-04 | -1.75E-04 | 50 | 46 | 45 | -1.17E-03 | 6.73E-02  | 6.60E-02  |
| 51 | 1  | -1.70E-05 | 1.44E-03  | 1.44E-03  | 51 | 1  | 2  | 5.55E-04  | -3.34E+00 | -3.34E+00 |
| 52 | 51 | 5.87E-04  | 6.04E-04  | -6.11E-03 | 52 | 51 | 1  | 2.41E-01  | -6.18E-01 | 3.06E+00  |
| 53 | 51 | -6.05E-04 | -6.69E-03 | 1.20E-05  | 53 | 51 | 1  | -2.44E-01 | 2.82E+00  | -8.63E-01 |
| 54 | 51 | -6.00E-07 | 6.16E-03  | 6.15E-03  | 54 | 51 | 1  | 3.68E-04  | -2.02E+00 | -2.02E+00 |
| 55 | 52 | -4.96E-04 | -6.34E-04 | 4.31E-04  | 55 | 52 | 51 | 3.77E-02  | 6.33E-01  | 7.72E-01  |
| 56 | 52 | 3.85E-04  | 1.46E-03  | -1.29E-04 | 56 | 52 | 51 | 8.86E-03  | -1.30E+00 | 2.02E-02  |
| 57 | 52 | -4.15E-04 | -1.02E-04 | -1.18E-03 | 57 | 52 | 51 | -1.33E-01 | 1.38E-01  | -7.43E-01 |
| 58 | 53 | 4.98E-04  | 9.26E-04  | -1.38E-04 | 58 | 53 | 51 | -3.84E-02 | 7.33E-01  | 5.96E-01  |
| 59 | 53 | 4.14E-04  | -7.68E-04 | 3.11E-04  | 59 | 53 | 51 | 1.33E-01  | -6.10E-01 | 2.72E-01  |

|    |    |           |           |           |    |    |    |           |           |           |
|----|----|-----------|-----------|-----------|----|----|----|-----------|-----------|-----------|
| 60 | 53 | -3.78E-04 | -5.12E-04 | 1.08E-03  | 60 | 53 | 51 | -9.45E-03 | 8.46E-03  | -1.31E+00 |
| 61 | 54 | 1.10E-06  | 9.44E-04  | 9.44E-04  | 61 | 54 | 51 | -4.33E-04 | 4.39E-01  | 4.38E-01  |
| 62 | 54 | -5.22E-05 | -3.72E-04 | -1.61E-03 | 62 | 54 | 51 | -7.29E-02 | -9.42E-01 | 5.08E-01  |
| 63 | 54 | 5.50E-05  | -1.56E-03 | -3.24E-04 | 63 | 54 | 51 | 7.31E-02  | 5.80E-01  | -8.69E-01 |
| 64 | 10 | -6.40E-06 | 1.80E-04  | 1.92E-04  | 64 | 10 | 8  | -1.01E-03 | -2.43E-02 | -2.78E-02 |
| 65 | 64 | -9.57E-04 | -7.88E-04 | -2.15E-04 | 65 | 64 | 10 | 9.42E-01  | 1.35E+00  | -2.65E-01 |
| 66 | 64 | -3.10E-06 | -3.12E-04 | -3.17E-04 | 66 | 64 | 10 | -9.80E-04 | -9.60E-02 | -9.04E-02 |
| 67 | 64 | 9.38E-04  | 7.52E-04  | 1.58E-04  | 67 | 64 | 10 | -9.42E-01 | -1.21E+00 | 3.94E-01  |
| 68 | 65 | -3.40E-04 | -7.33E-04 | 4.36E-04  | 68 | 65 | 64 | 2.16E-01  | 5.32E-01  | -2.62E-01 |
| 69 | 65 | -4.09E-04 | -3.76E-04 | 1.88E-04  | 69 | 65 | 64 | 2.69E-01  | 2.90E-01  | -8.38E-02 |
| 70 | 65 | -2.04E-04 | -3.42E-04 | 1.99E-04  | 70 | 65 | 64 | -1.03E-01 | -2.82E-01 | 1.23E-01  |
| 71 | 66 | -8.47E-04 | -2.11E-03 | 1.11E-04  | 71 | 66 | 64 | -9.67E-02 | -5.64E-02 | -1.62E-01 |
| 72 | 66 | 7.00E-07  | 5.44E-05  | 5.50E-05  | 72 | 66 | 64 | 2.59E-04  | 2.75E-02  | 2.74E-02  |
| 73 | 66 | 8.52E-04  | 9.59E-04  | -1.26E-03 | 73 | 66 | 64 | 9.65E-02  | -6.83E-02 | 4.03E-02  |
| 74 | 67 | 2.09E-04  | 4.06E-04  | -1.35E-04 | 74 | 67 | 64 | 1.02E-01  | 2.26E-01  | -1.78E-01 |
| 75 | 67 | 4.04E-04  | 5.92E-04  | 2.61E-05  | 75 | 67 | 64 | -2.67E-01 | -3.53E-01 | 2.02E-02  |
| 76 | 67 | 3.44E-04  | 7.81E-04  | -3.86E-04 | 76 | 67 | 64 | -2.18E-01 | -4.84E-01 | 3.11E-01  |
| 77 | 3  | -1.37E-05 | -2.61E-03 | -2.62E-03 | 77 | 3  | 1  | 3.91E-04  | -1.26E-01 | -1.25E-01 |
| 78 | 2  | -1.50E-05 | -5.58E-03 | -5.57E-03 | 78 | 2  | 1  | -3.99E-04 | 6.59E-02  | 6.57E-02  |
| 79 | 7  | -9.70E-06 | -1.28E-03 | -1.27E-03 | 79 | 7  | 6  | 3.46E-04  | -2.38E-01 | -2.38E-01 |
| 80 | 14 | -7.00E-07 | 6.62E-04  | 6.20E-04  | 80 | 14 | 13 | 1.30E-03  | 9.17E-01  | 9.17E-01  |
| 81 | 46 | 2.60E-06  | -3.97E-03 | -3.98E-03 | 81 | 46 | 45 | -5.41E-04 | 3.90E-02  | 3.78E-02  |
| 82 | 22 | -5.50E-06 | 6.30E-03  | 6.26E-03  | 82 | 22 | 21 | -6.24E-05 | 1.75E-01  | 1.75E-01  |

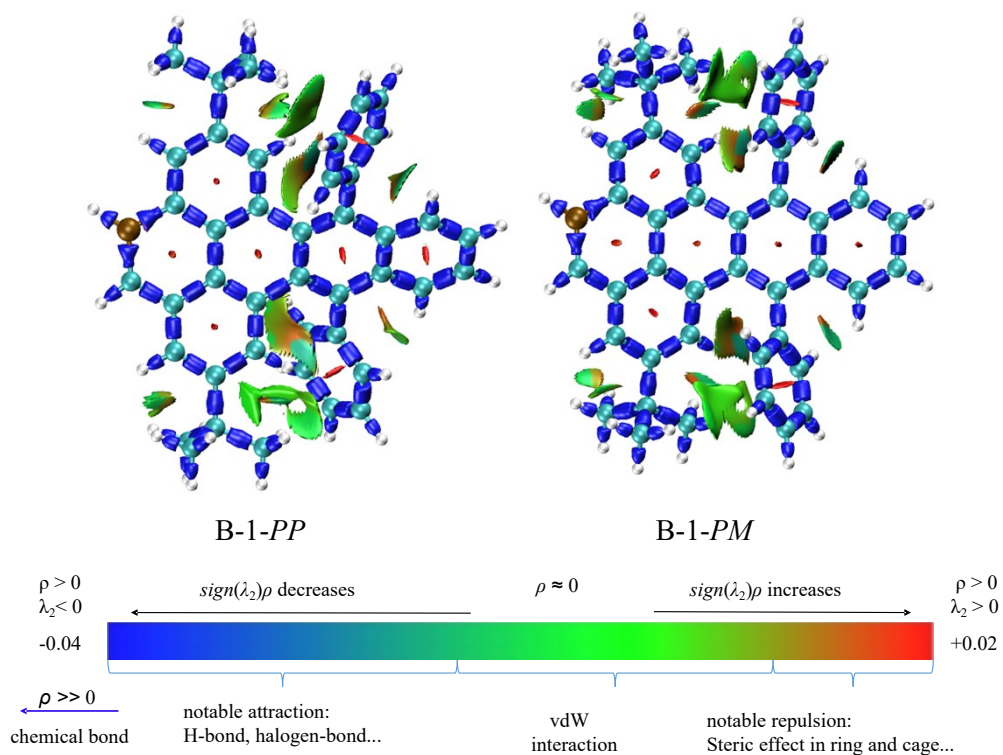

Figure S1. Interaction region indicator (IRI) of chemical bonds and weak interactions for compound B-1-PP/PM, which were computed by Gaussian 09 at M06-2X/6-311G\*\* level and plotted by Multiwfn and VMD programs. The IRI isovalue is 1.

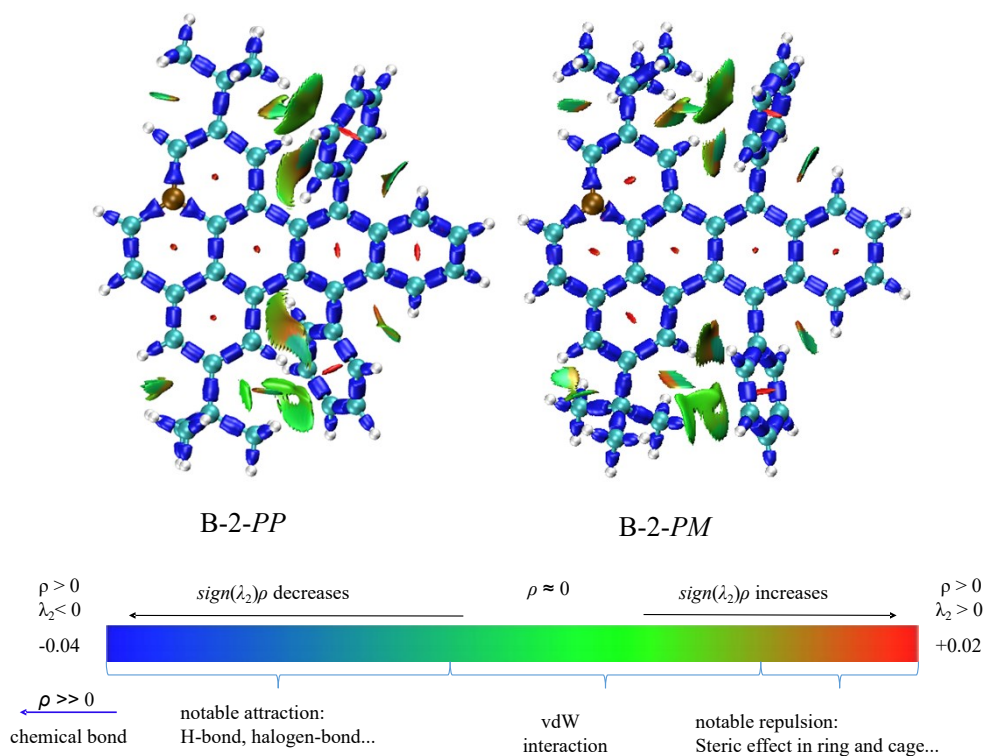

Figure S2. Interaction region indicator (IRI) of chemical bonds and weak interactions for compound B-2-PP/PM, which were computed by Gaussian 09 at M06-2X/6-311G\*\* level and plotted by Multiwfn and VMD programs. The IRI isovalue is 1.



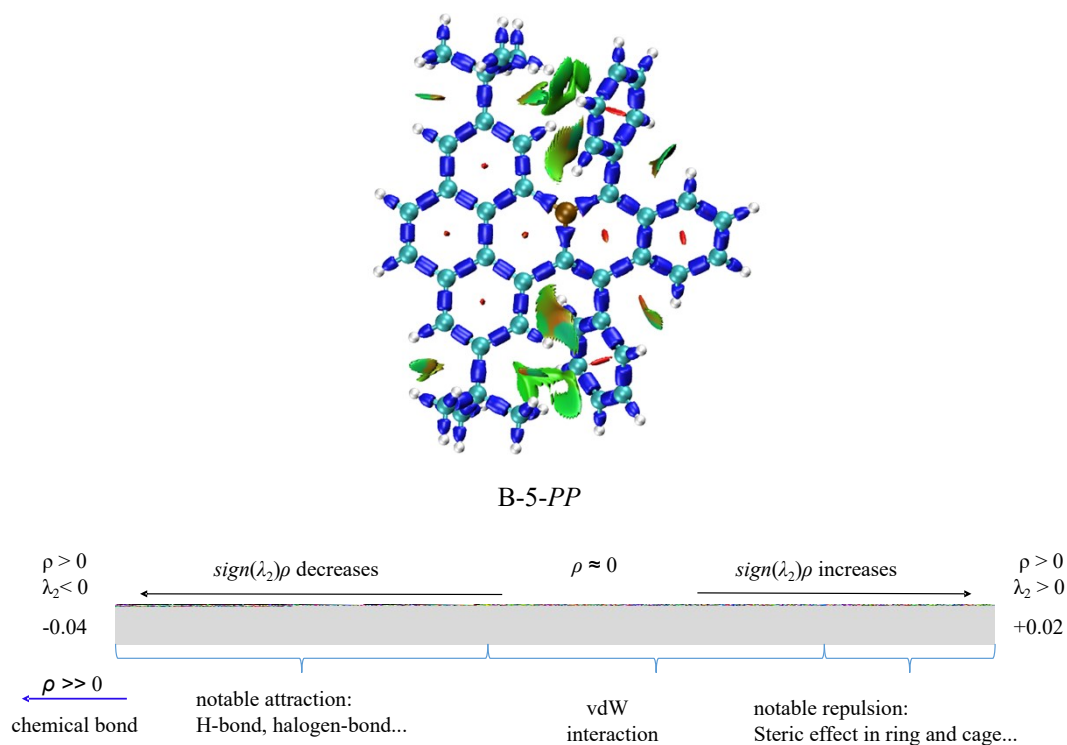

Figure S5. Interaction region indicator (IRI) of chemical bonds and weak interactions for compound B-5-PP, which were computed by Gaussian 09 at M06-2X/6-311G\*\* level and plotted by Multiwfn and VMD programs. The IRI isovalue is 1.

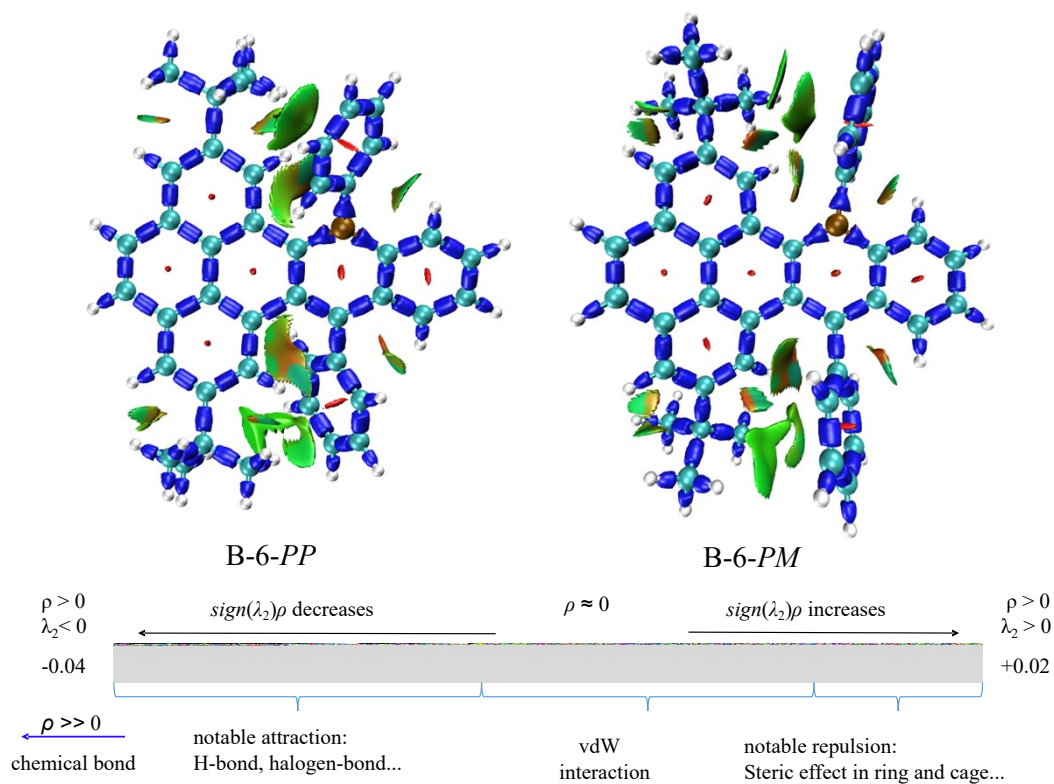

Figure S6. Interaction region indicator (IRI) of chemical bonds and weak interactions for compound B-6-PP/PM, which were computed by Gaussian 09 at M06-2X/6-311G\*\* level and plotted by Multiwfn and VMD programs. The IRI isovalue is 1.

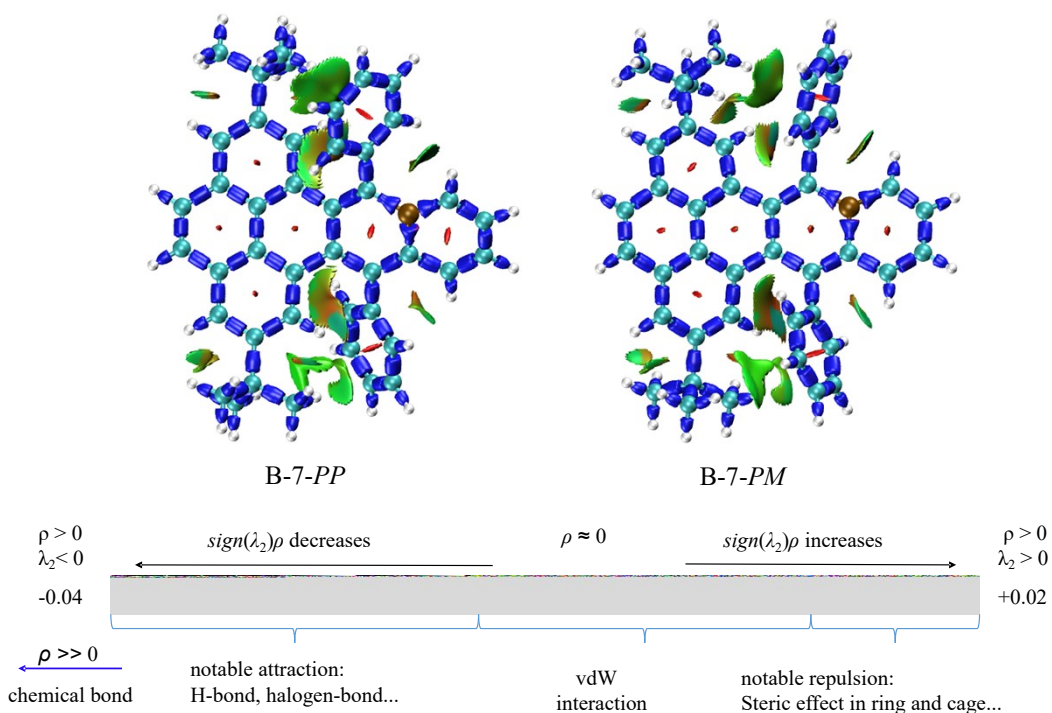

Figure S7. Interaction region indicator (IRI) of chemical bonds and weak interactions for compound B-7-PP/PM, which were computed by Gaussian 09 at M06-2X/6-311G\*\* level and plotted by Multiwfn and VMD programs. The IRI isovalue is 1.

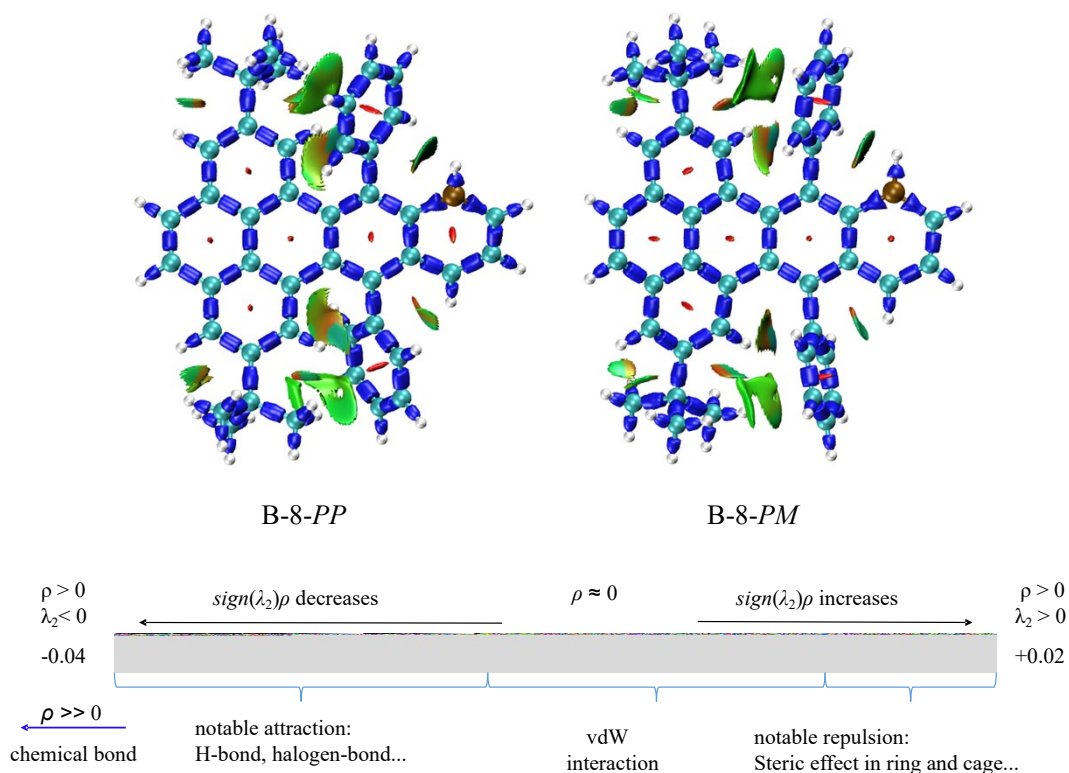

Figure S8. Interaction region indicator (IRI) of chemical bonds and weak interactions for compound B-8-PP/PM, which were computed by Gaussian 09 at M06-2X/6-311G\*\* level and plotted by Multiwfn and VMD programs. The IRI isovalue is 1.

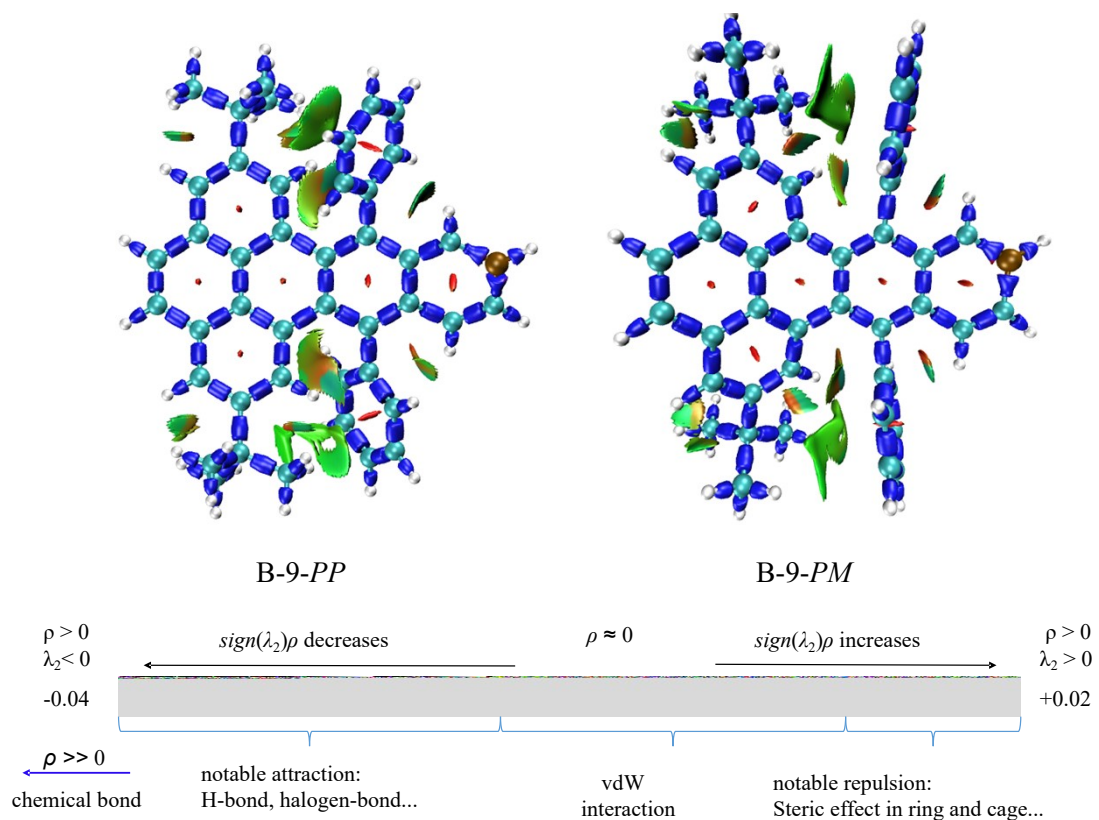

Figure S9. Interaction region indicator (IRI) of chemical bonds and weak interactions for compound B-9-PP/PM, which were computed by Gaussian 09 at M06-2X/6-311G\*\* level and plotted by Multiwfn and VMD programs. The IRI isovalue is 1.

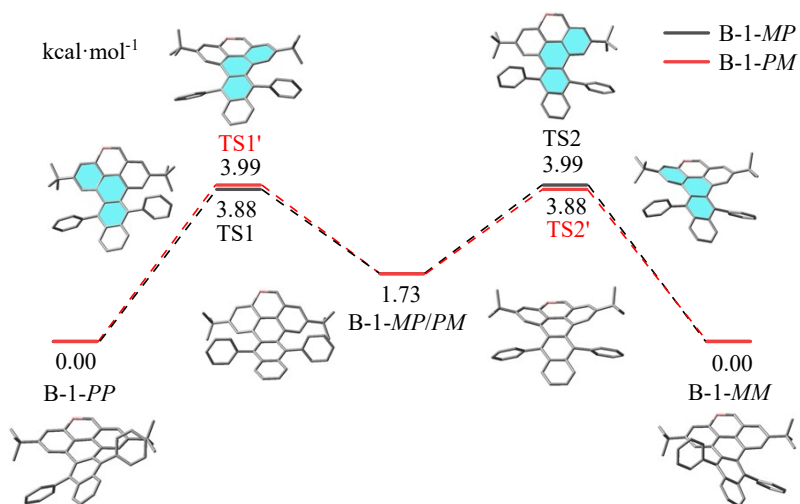

Figure S10. Racemization pathway of B-1 calculated at the M06-2X/6-311G\*\* level. The relative Gibbs free energies of the stationary points are given in kcal·mol<sup>-1</sup>.

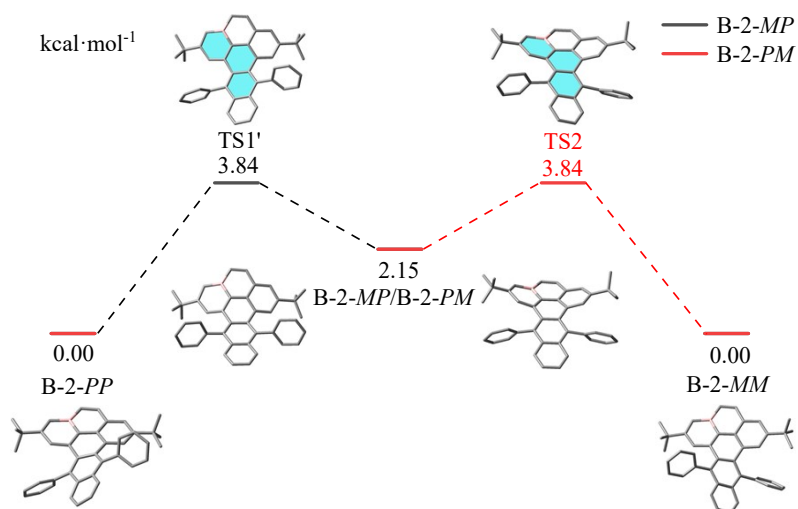

Figure S11. Racemization pathway of B-2 calculated at the M06-2X/6-311G\*\* level. The relative Gibbs free energies of the stationary points are given in kcal·mol<sup>-1</sup>.

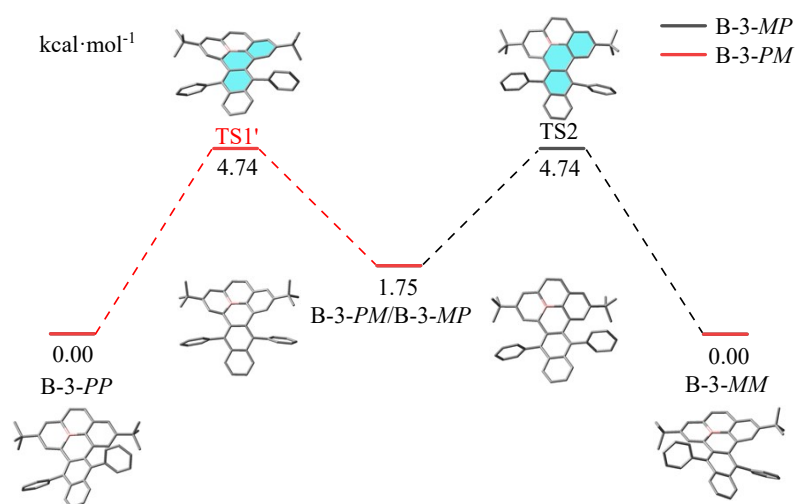

Figure S12. Racemization pathway of B-3 calculated at the M06-2X/6-311G\*\* level. The relative Gibbs free energies of the stationary points are given in  $\text{kcal}\cdot\text{mol}^{-1}$ .

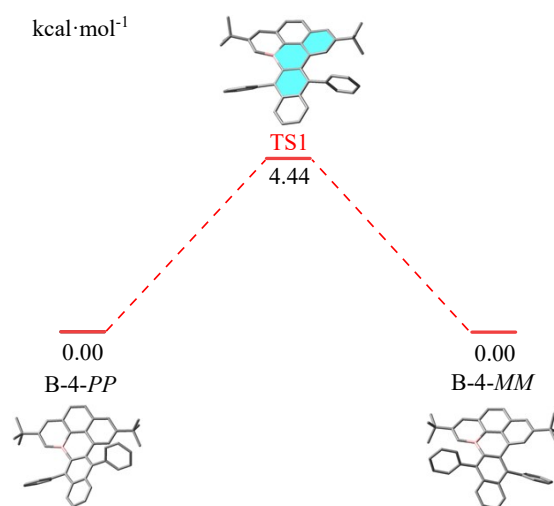

Figure S13. Racemization pathway of B-4 calculated at the M06-2X/6-311G\*\* level. The relative Gibbs free energies of the stationary points are given in  $\text{kcal}\cdot\text{mol}^{-1}$ .

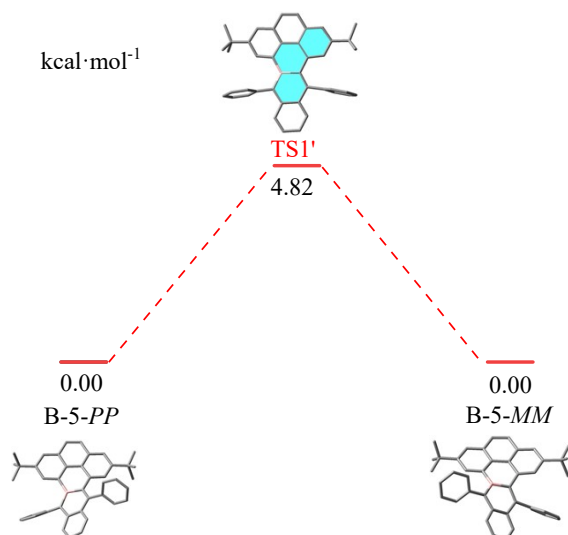

Figure S14. Racemization pathway of B-5 calculated at the M06-2X/6-311G\*\* level. The relative Gibbs free energies of the stationary points are given in kcal·mol<sup>-1</sup>.

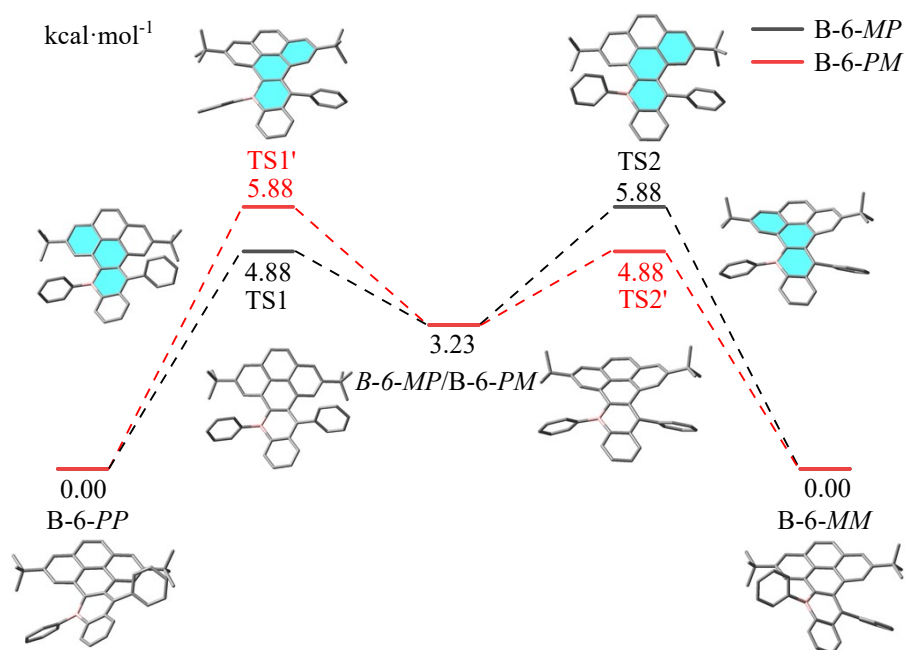

Figure S15. Racemization pathway of B-6 calculated at the M06-2X/6-311G\*\* level. The relative Gibbs free energies of the stationary points are given in kcal·mol<sup>-1</sup>.



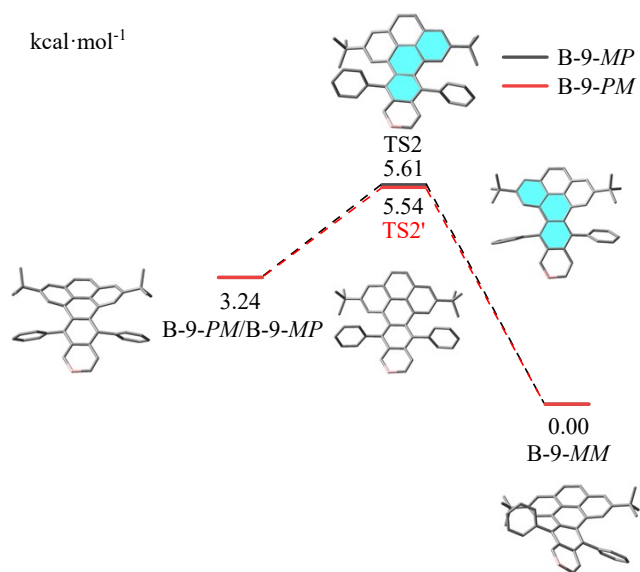

Figure S18. Racemization pathway of B-9 calculated at the M06-2X/6-311G\*\* level. The relative Gibbs free energies of the stationary points are given in kcal·mol<sup>-1</sup>.

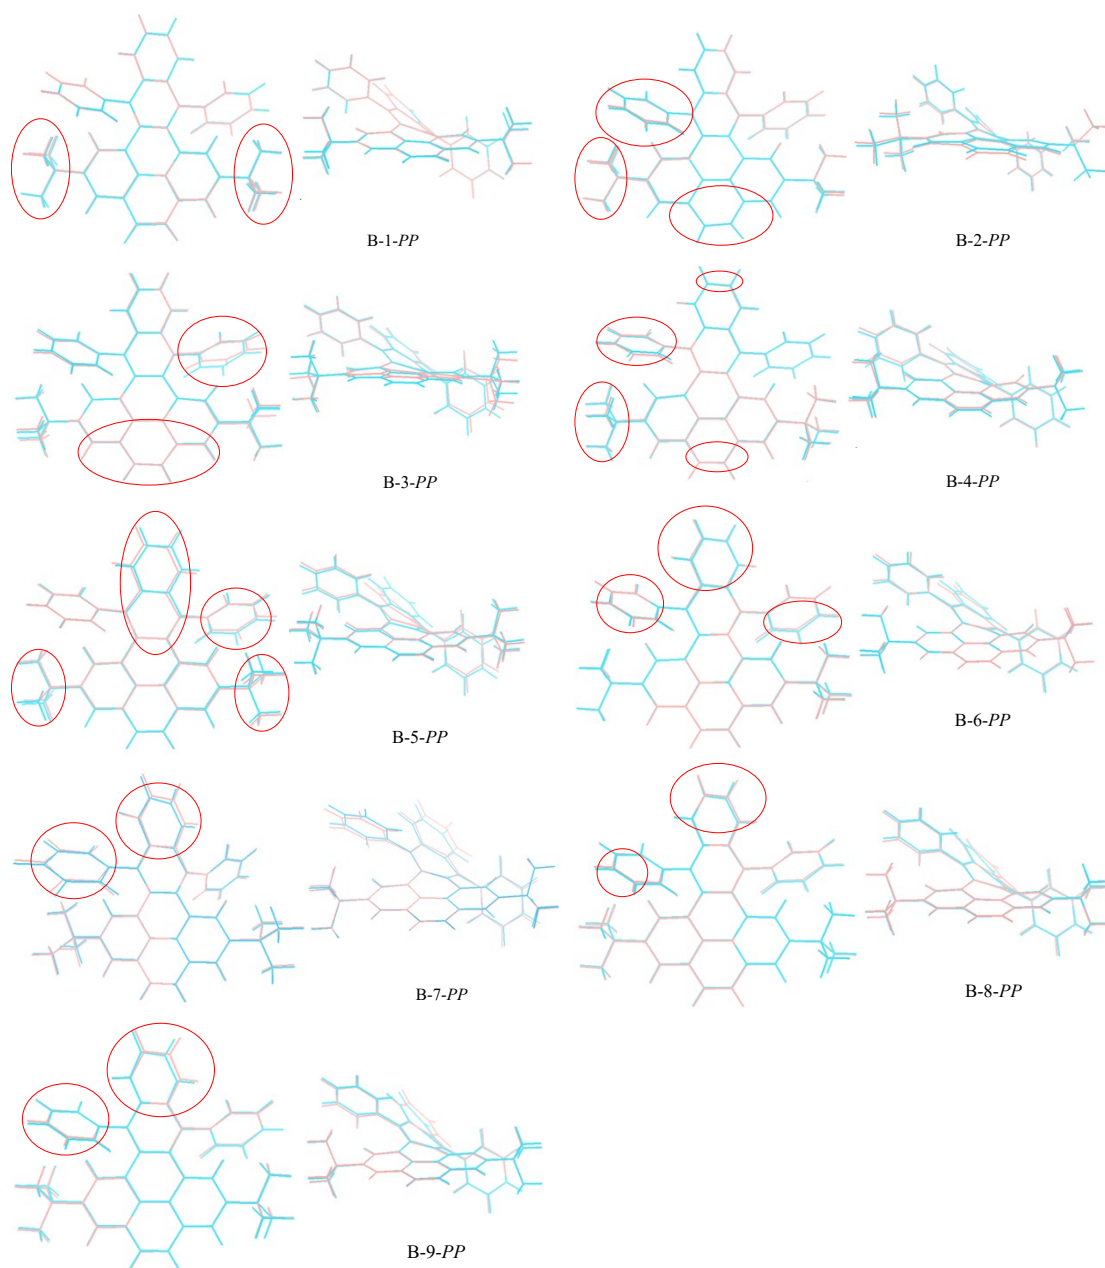

Figure S19. Structural overlays comparing the ground ( $D_0$ , blue) and first excited ( $D_1$ , pink) states for compounds B-1-PP, B-2-PP, B-3-PP, B-4-PP, B-5-PP, B-6-PP, B-7-PP, B-8-PP, and B-9-PP optimized at the M06-2X/6-311G\*\* level.

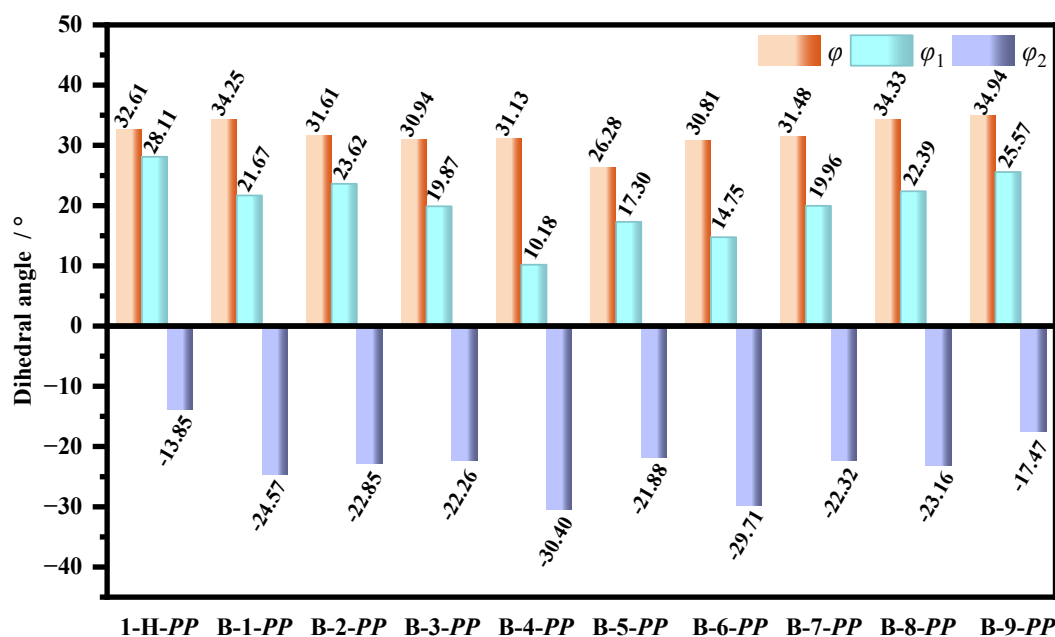

Figure S20. The dihedral angles  $\varphi$  between the pyrene and naphthalene rings in the second excited states, as well as the dihedral angles  $\varphi_1$  and  $\varphi_2$  between the two bay regions for compounds 1-H-PP, B-1-PP, B-2-PP, B-3-PP, B-4-PP, B-5-PP, B-6-PP, B-7-PP, B-8-PP and B-9-PP.

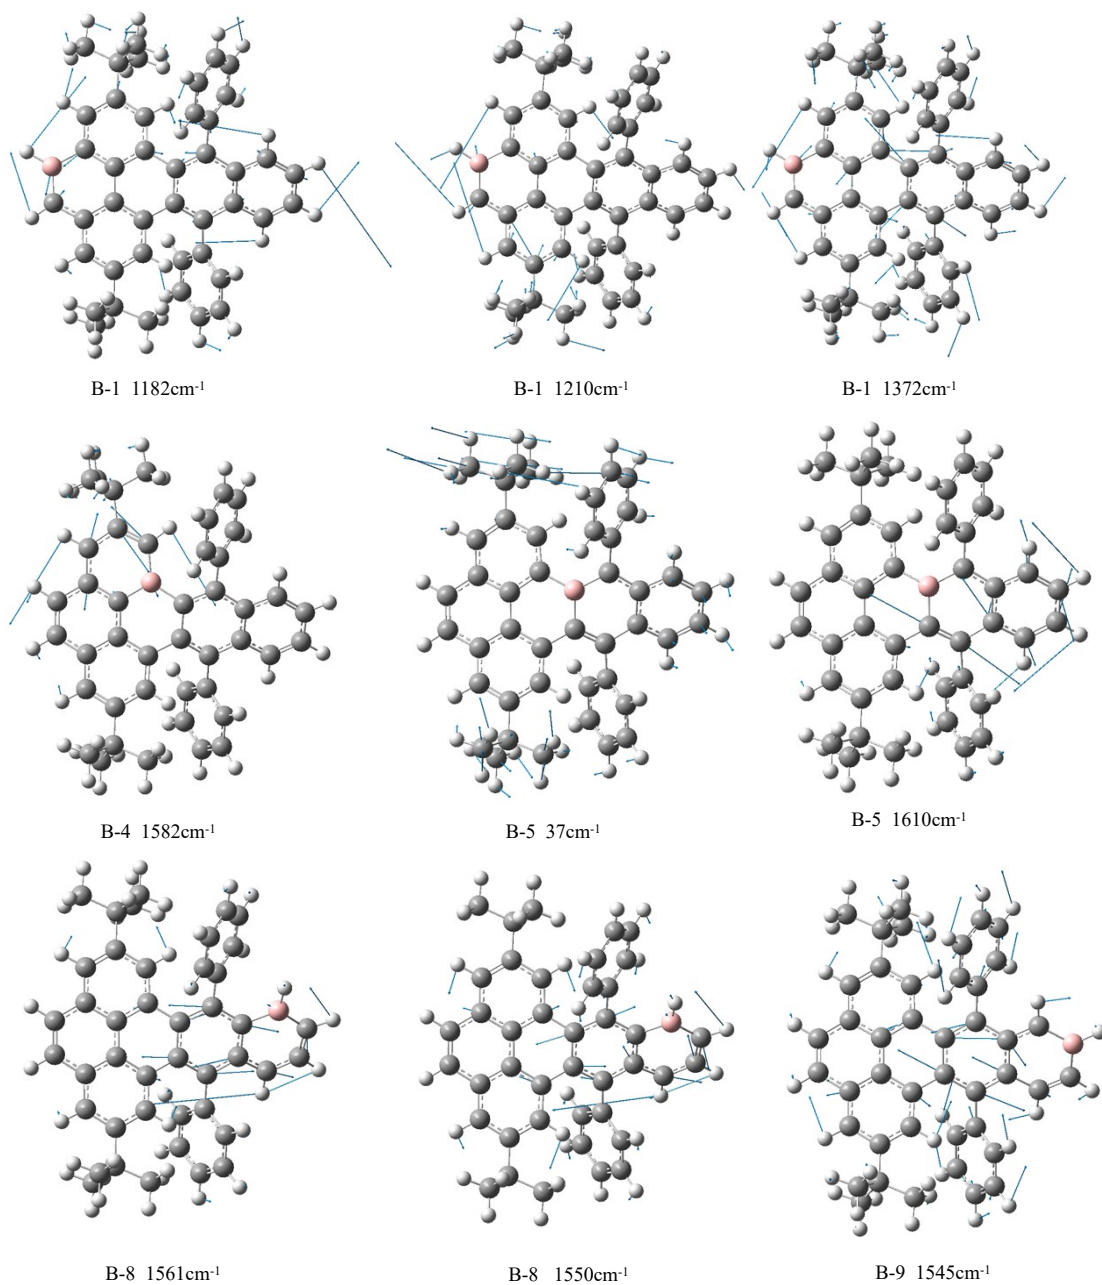

Figure S21. Vibration modes of B-1-PP, B-4-PP, B-5-PP, B-8-PP and B-9-PP.

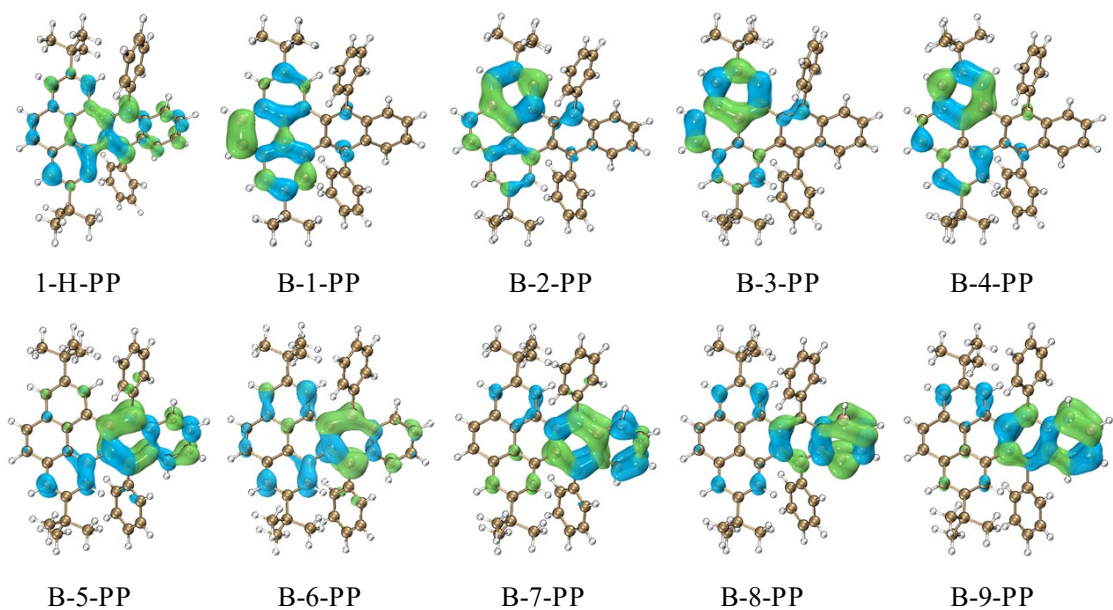

Figure S22. Electron-hole distributions for the  $D_0 \rightarrow D_1$  transition of compounds 1-H-PP, B-1-PP, B-2-PP, B-3-PP, B-4-PP, B-5-PP, B-6-PP, B-7-PP, B-8-PP, and B-9-PP (green represents electrons, blue represents holes).

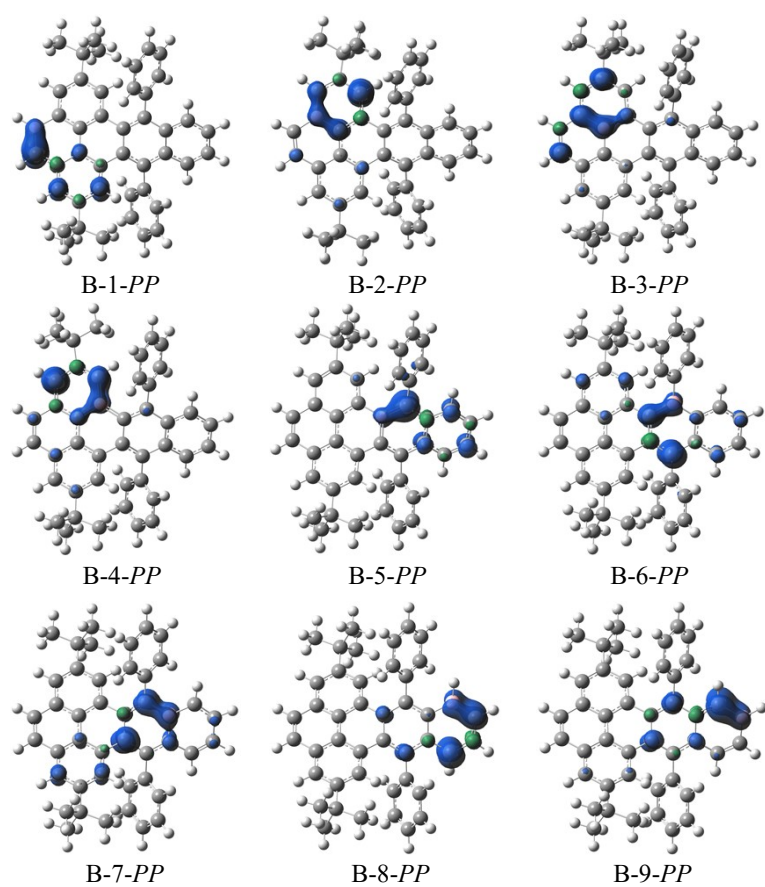

Figure S23. Spin density distributions for the boron embedded compounds in the ground state (blue represents positive spin, green represents negative spin).

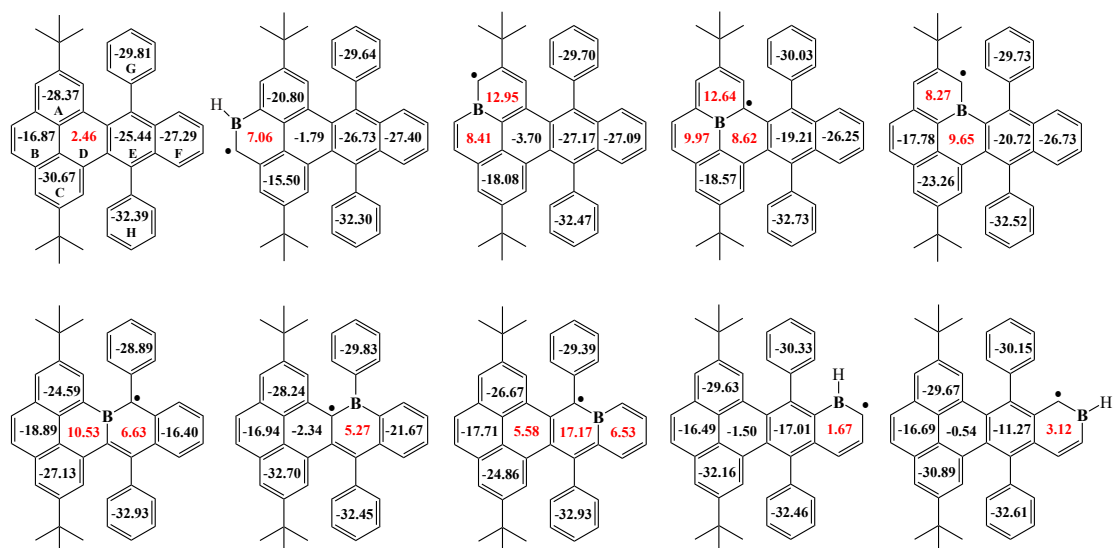

Figure S24. NICS (1)<sub>ZZ</sub> values (in units of ppm) for compounds 1-H-PP, B-1-PP, B-2-PP, B-3-PP, B-4-PP, B-5-PP, B-6-PP, B-7-PP, B-8-PP, and B-9-PP in the ground state.

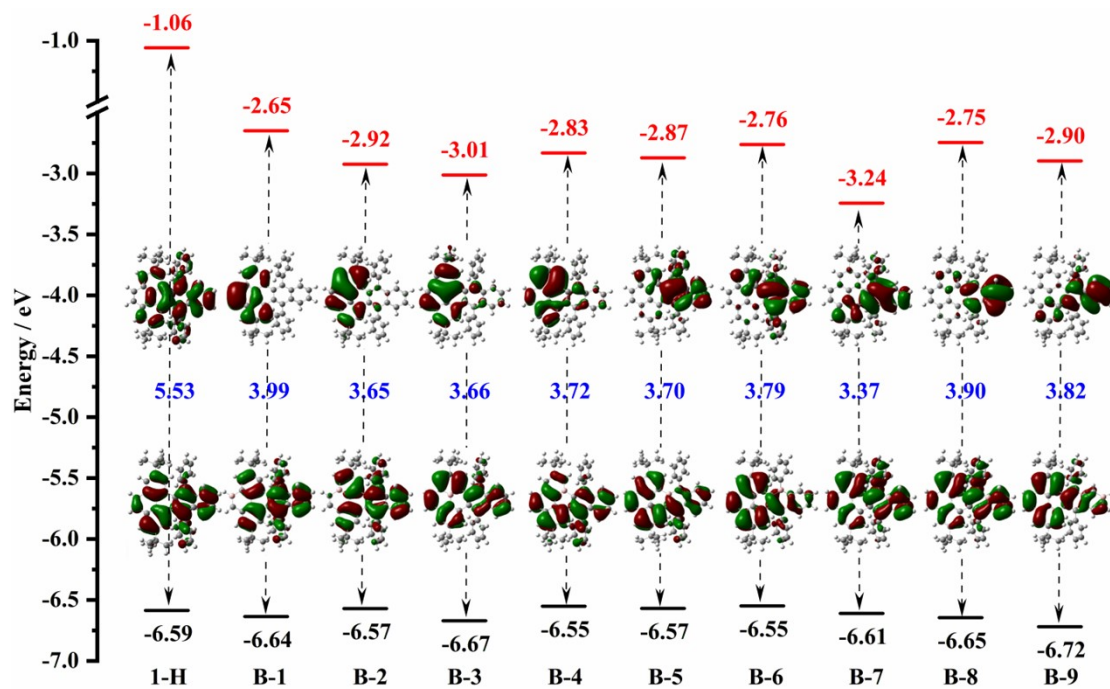

Figure S25. The TD-M06-2X/6-311G\*\* energy levels and  $\beta$  wave-functions for HOMOs and SOMOs of B-1-PP, B-2-PP, B-3-PP, B-4-PP, B-5-PP, B-6-PP, B-7-PP, B-8-PP, and B-9-PP in  $D_0$  state.

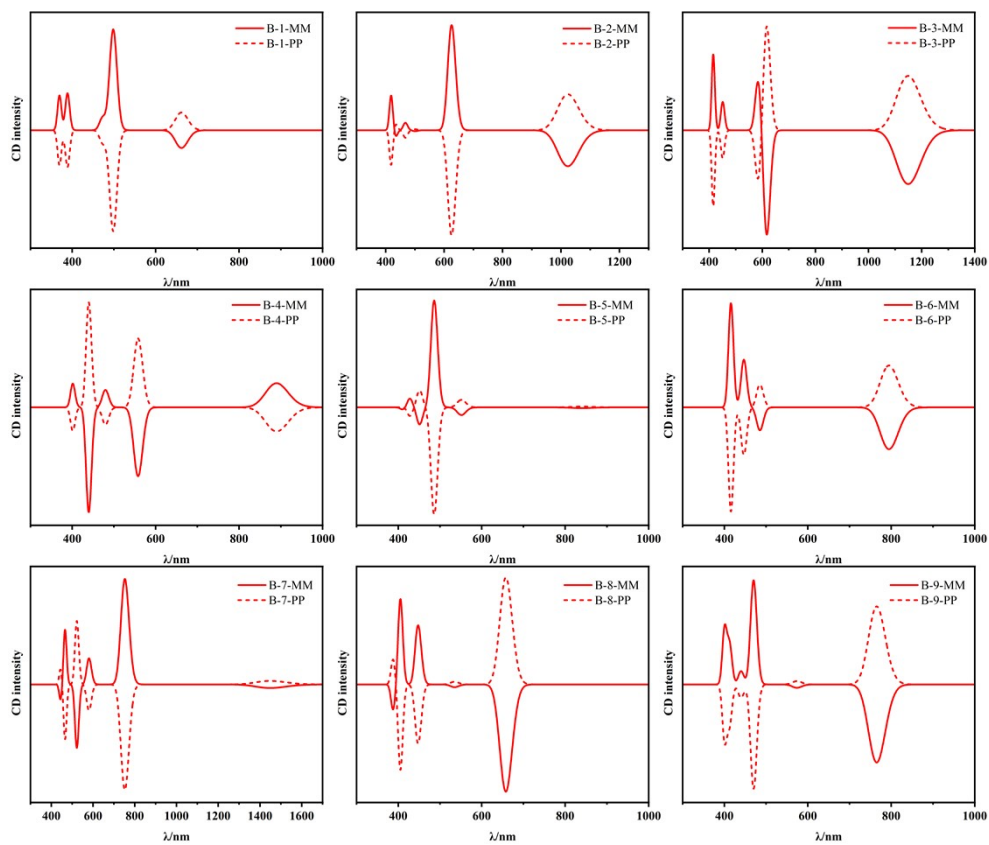

Figure S26. ECD spectra for compounds B-1-PP/MM, B-2-PP/MM, B-3-PP/MM, B-4-PP/MM, B-5-PP/MM, B-6-PP/MM, B-7-PP/MM, B-8-PP/MM, B-9-PP/MM.

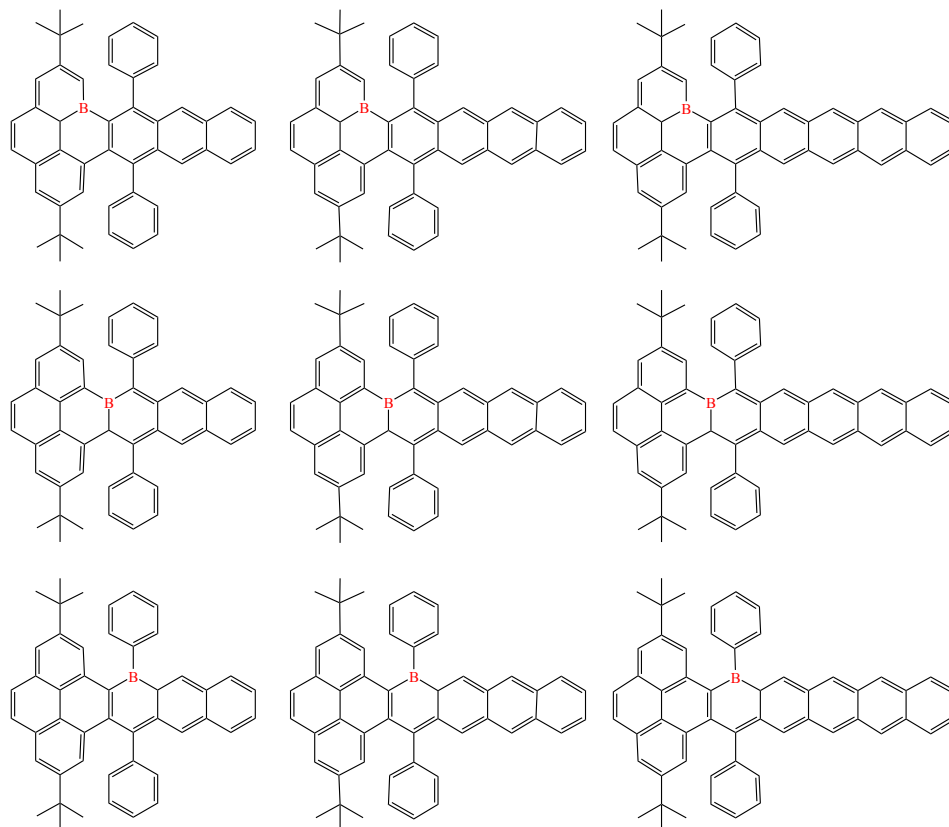

Figure S27. The structures of pyrene anthracene, pyrene tetracene, and pyrene pentacene with boron embedded at the 4, 5, and 6 positions, respectively.

Table S25. Cartesian coordinates for the optimized species at M06-2X/6-311G\*\* level.

1-H-PP

Energy (with Zero-point Energy correction) = -1699.337458 (-1698.646072) Hartree

Free energy (298 K) = -1698.712306 Hartree

Zero number of imaginary frequency

0 1

|   |             |             |             |
|---|-------------|-------------|-------------|
| C | -3.42026200 | -2.09865600 | -0.72279200 |
| C | -2.69272800 | -3.26631300 | -0.58941500 |
| C | -1.42083300 | -0.79248500 | -0.14116500 |
| C | -2.76270400 | -0.87916700 | -0.49343300 |
| C | -0.56299300 | -4.44869200 | -0.17626700 |
| C | 0.74677800  | -1.96248800 | 0.10711400  |
| C | 1.45676200  | -3.17741600 | 0.26531100  |
| C | 0.75625800  | -4.42326800 | 0.11154200  |
| C | 2.82323300  | -3.14701800 | 0.55982400  |
| H | 3.34423300  | -4.09305000 | 0.66837700  |
| C | 3.49661100  | -1.94714200 | 0.73518300  |
| C | 2.78565000  | -0.75835000 | 0.53509800  |
| C | 1.44086500  | -0.73364400 | 0.16341800  |
| C | 0.70128100  | 0.53029900  | -0.06788900 |
| C | -0.73313700 | 0.50261600  | 0.08080700  |
| H | -1.08350200 | -5.39099100 | -0.30876600 |
| H | -3.15840800 | -4.23483400 | -0.72650400 |
| H | -3.33346700 | 0.02642700  | -0.61677900 |
| H | 1.31844900  | -5.34427300 | 0.22125200  |
| H | 3.29844300  | 0.17517400  | 0.68847900  |
| C | -1.40685200 | 1.68949600  | 0.36134800  |
| C | 1.32847200  | 1.73735100  | -0.37176700 |
| C | 0.59809900  | 2.95894000  | -0.28027300 |
| C | -0.72796600 | 2.93774700  | 0.23572600  |
| C | -2.81534000 | 1.72318900  | 0.85781500  |
| C | -3.82353700 | 2.39175600  | 0.15616900  |
| C | -3.13177700 | 1.11919200  | 2.07527800  |
| C | -5.11557400 | 2.45960200  | 0.66425000  |
| H | -3.58508200 | 2.86025600  | -0.79301200 |
| C | -4.42300100 | 1.19124800  | 2.58697800  |
| H | -2.35491000 | 0.59411300  | 2.61954600  |
| C | -5.41743100 | 1.86474100  | 1.88608800  |
| H | -5.88608000 | 2.97945900  | 0.10714000  |
| H | -4.65090800 | 0.72189500  | 3.53660300  |
| H | -6.42314700 | 1.92039100  | 2.28505600  |
| C | 2.74021200  | 1.80714200  | -0.85241100 |
| C | 3.11005500  | 1.12640400  | -2.01356500 |

|   |             |             |             |
|---|-------------|-------------|-------------|
| C | 3.70633600  | 2.55876700  | -0.17670900 |
| C | 4.41566000  | 1.19060200  | -2.48625600 |
| H | 2.36569200  | 0.53758500  | -2.53771800 |
| C | 5.01098600  | 2.62751700  | -0.65113900 |
| H | 3.42808300  | 3.08467500  | 0.73042100  |
| C | 5.36995000  | 1.94266600  | -1.80812400 |
| H | 4.68666100  | 0.65635100  | -3.38917100 |
| H | 5.74924900  | 3.20993900  | -0.11252500 |
| H | 6.38698500  | 1.99403000  | -2.17806300 |
| C | -1.34754200 | 4.17957200  | 0.56137000  |
| C | 1.16260200  | 4.21606200  | -0.64445600 |
| C | 0.50801900  | 5.38790400  | -0.38602000 |
| C | -0.74453900 | 5.37043100  | 0.26699200  |
| H | -2.31401300 | 4.17637900  | 1.04595000  |
| H | 2.12737600  | 4.23980700  | -1.13177000 |
| H | 0.95690200  | 6.33203500  | -0.67038500 |
| H | -1.23504100 | 6.30225100  | 0.52167400  |
| C | -4.90519300 | -2.07400200 | -1.08971900 |
| C | -5.69225800 | -1.41315600 | 0.05377200  |
| C | -5.10065400 | -1.25731000 | -2.37832700 |
| C | -5.46385000 | -3.48099900 | -1.31973200 |
| H | -5.56194700 | -1.97094300 | 0.98488500  |
| H | -5.35983100 | -0.38787400 | 0.22798200  |
| H | -6.75886900 | -1.38768000 | -0.18868400 |
| H | -4.52963800 | -1.69172400 | -3.20251600 |
| H | -6.15808200 | -1.24788500 | -2.65724000 |
| H | -4.77957800 | -0.22118500 | -2.25057800 |
| H | -6.52180600 | -3.41341300 | -1.58377100 |
| H | -4.94586700 | -3.99026300 | -2.13658000 |
| H | -5.38359400 | -4.09608200 | -0.41981900 |
| C | 4.98261800  | -1.95407500 | 1.10530900  |
| C | 5.77357900  | -2.61884200 | -0.03423500 |
| C | 5.53585600  | -0.54029800 | 1.30747000  |
| C | 5.18799600  | -2.74762100 | 2.40582400  |
| H | 5.44893800  | -3.64818600 | -0.20114300 |
| H | 5.63726100  | -2.06386800 | -0.96602000 |
| H | 6.84032500  | -2.63436600 | 0.20697800  |
| H | 5.01328300  | -0.01365600 | 2.11087900  |
| H | 6.59282500  | -0.60068400 | 1.57857700  |
| H | 5.45591600  | 0.05588300  | 0.39521400  |
| H | 6.24717700  | -2.75370800 | 2.67795600  |
| H | 4.62394700  | -2.29582300 | 3.22539700  |
| H | 4.86202200  | -3.78460100 | 2.30316000  |
| C | -0.66920000 | -1.99306400 | -0.11287300 |

C                    -1.32050600    -3.23283200    -0.29686300

B-1-PP

Energy (with Zero-point Energy correction) = -1686.048077 (-1685.361760) Hartree

Free energy (298 K) = -1685.429361 Hartree

Zero number of imaginary frequency

0 2

|   |             |             |             |
|---|-------------|-------------|-------------|
| C | -3.44041900 | -2.08193300 | -0.75876500 |
| C | -2.71086700 | -3.26388500 | -0.64638900 |
| C | -1.41717100 | -0.82796200 | -0.13684800 |
| C | -2.76940900 | -0.89017200 | -0.49966000 |
| C | 0.75234900  | -1.99465800 | 0.10364700  |
| C | 1.50778800  | -3.20223300 | 0.28387400  |
| C | 0.90200700  | -4.47105300 | 0.13018700  |
| C | 2.87732000  | -3.11436500 | 0.60131200  |
| H | 3.42038800  | -4.04584800 | 0.72573800  |
| C | 3.52002700  | -1.89745300 | 0.78042900  |
| C | 2.77275900  | -0.74383200 | 0.55815800  |
| C | 1.42181400  | -0.76486400 | 0.15420100  |
| C | 0.68593100  | 0.49768600  | -0.08120700 |
| C | -0.74072500 | 0.46801200  | 0.09001500  |
| H | -1.11319800 | -5.63908300 | -0.40163900 |
| H | -3.18925300 | -4.22267100 | -0.80827900 |
| H | -3.31887400 | 0.03083400  | -0.61166800 |
| H | 1.55513700  | -5.32826800 | 0.27305300  |
| H | 3.23974100  | 0.21181200  | 0.72639000  |
| C | -1.41127300 | 1.65447500  | 0.38685400  |
| C | 1.31030400  | 1.70202100  | -0.40574900 |
| C | 0.57926300  | 2.92146300  | -0.30701200 |
| C | -0.73429200 | 2.90071800  | 0.24384600  |
| C | -2.80698000 | 1.67860600  | 0.91723700  |
| C | -3.83063400 | 2.36919300  | 0.26005000  |
| C | -3.09787100 | 1.03292400  | 2.11989900  |
| C | -5.11086200 | 2.42022800  | 0.79860500  |
| H | -3.61425600 | 2.86647700  | -0.67970400 |
| C | -4.37779400 | 1.08675500  | 2.66122800  |
| H | -2.31005900 | 0.48948100  | 2.62932400  |
| C | -5.38652400 | 1.78397300  | 2.00568400  |
| H | -5.89331000 | 2.95713600  | 0.27538000  |
| H | -4.58551800 | 0.58448000  | 3.59851600  |
| H | -6.38347400 | 1.82529000  | 2.42765100  |
| C | 2.71115800  | 1.75850200  | -0.91738500 |
| C | 3.06406100  | 1.02142400  | -2.04972800 |
| C | 3.68762700  | 2.54363700  | -0.29589800 |

|   |             |             |             |
|---|-------------|-------------|-------------|
| C | 4.36167200  | 1.06345700  | -2.54632900 |
| H | 2.31247200  | 0.40760200  | -2.53343000 |
| C | 4.98345700  | 2.59175100  | -0.79592400 |
| H | 3.42525800  | 3.11110700  | 0.59063600  |
| C | 5.32515600  | 1.84998300  | -1.92272700 |
| H | 4.61863900  | 0.48533800  | -3.42599500 |
| H | 5.72905100  | 3.20142000  | -0.29919000 |
| H | 6.33566700  | 1.88468800  | -2.31190400 |
| C | -1.34343400 | 4.14443200  | 0.58456600  |
| C | 1.12889900  | 4.17764000  | -0.69815800 |
| C | 0.48036400  | 5.34949000  | -0.42744100 |
| C | -0.75081400 | 5.33383100  | 0.26658200  |
| H | -2.29386000 | 4.14252900  | 1.09983300  |
| H | 2.07691200  | 4.19975300  | -1.21740600 |
| H | 0.91716500  | 6.29260000  | -0.73308700 |
| H | -1.23341000 | 6.26649600  | 0.53293900  |
| C | -4.92207200 | -2.03529700 | -1.13687500 |
| C | -5.71197200 | -1.39581200 | 0.01677900  |
| C | -5.10239400 | -1.18574500 | -2.40621200 |
| C | -5.48911600 | -3.43240200 | -1.40481000 |
| H | -5.59394000 | -1.97753800 | 0.93477400  |
| H | -5.37009800 | -0.37850400 | 0.21845500  |
| H | -6.77655300 | -1.35380600 | -0.23236000 |
| H | -4.52950500 | -1.60444000 | -3.23719100 |
| H | -6.15776100 | -1.16042100 | -2.69194400 |
| H | -4.77364500 | -0.15566300 | -2.25068900 |
| H | -6.54458300 | -3.35034000 | -1.67499400 |
| H | -4.96827800 | -3.92628900 | -2.22909600 |
| H | -5.41944000 | -4.06995000 | -0.51995800 |
| C | 4.99678700  | -1.85928000 | 1.17970000  |
| C | 5.82708400  | -2.50357500 | 0.05659800  |
| C | 5.50010100  | -0.42793500 | 1.38569600  |
| C | 5.20047000  | -2.64257400 | 2.48645900  |
| H | 5.53511400  | -3.54221400 | -0.11393600 |
| H | 5.69307400  | -1.95402200 | -0.87877000 |
| H | 6.88893000  | -2.48891200 | 0.31802900  |
| H | 4.94657600  | 0.08435700  | 2.17768400  |
| H | 6.55333200  | -0.45267300 | 1.67576800  |
| H | 5.41725600  | 0.16102100  | 0.46902900  |
| H | 6.25409400  | -2.61698700 | 2.77774100  |
| H | 4.60890800  | -2.20502100 | 3.29427200  |
| H | 4.90747600  | -3.68922900 | 2.38178300  |
| C | -0.68187400 | -2.03214400 | -0.13352500 |
| C | -1.34549400 | -3.26426000 | -0.35221900 |

B                    -0.57052400   -4.59063000   -0.23364400

B-2-PP

Energy (with Zero-point Energy correction) = -1686.041708 (-1685.354431) Hartree

Free energy (298 K) = -1685.421846 Hartree

Zero number of imaginary frequency

0 2

|   |             |             |             |
|---|-------------|-------------|-------------|
| C | -3.46225100 | -2.16013400 | -0.76736900 |
| C | -2.82589400 | -3.36300600 | -0.63528600 |
| C | -1.38222000 | -0.85072800 | -0.12855900 |
| C | -2.73573600 | -0.94623000 | -0.52101100 |
| C | -0.45704000 | -4.64301400 | -0.10764200 |
| C | 0.78276300  | -1.97005700 | 0.11474500  |
| C | 1.50989500  | -3.18151800 | 0.28910900  |
| C | 0.85401400  | -4.48258300 | 0.17325900  |
| C | 2.86383300  | -3.12564100 | 0.57118200  |
| H | 3.40094700  | -4.06021600 | 0.70023000  |
| C | 3.53866100  | -1.90408600 | 0.72005600  |
| C | 2.82452200  | -0.73493600 | 0.50886800  |
| C | 1.46270000  | -0.73572600 | 0.15115100  |
| C | 0.70326900  | 0.51201200  | -0.07132000 |
| C | -0.72990800 | 0.45945800  | 0.08190700  |
| H | -0.83946400 | -5.65732000 | -0.18888300 |
| H | -3.39127900 | -4.27463100 | -0.80253300 |
| H | -3.26907600 | -0.02449200 | -0.69488800 |
| H | 1.50753100  | -5.34145500 | 0.31679700  |
| H | 3.32586400  | 0.20688600  | 0.64853600  |
| C | -1.42619700 | 1.63398200  | 0.37328400  |
| C | 1.30605800  | 1.73617700  | -0.37400500 |
| C | 0.55432500  | 2.93961600  | -0.26941100 |
| C | -0.76952900 | 2.89190700  | 0.25641400  |
| C | -2.82895600 | 1.63133500  | 0.88673800  |
| C | -3.85160400 | 2.32862400  | 0.23423000  |
| C | -3.12319400 | 0.97714300  | 2.08487000  |
| C | -5.12812600 | 2.39216000  | 0.78051900  |
| H | -3.63397100 | 2.83177900  | -0.70212700 |
| C | -4.40031000 | 1.04141500  | 2.63239100  |
| H | -2.33718900 | 0.42800400  | 2.59115400  |
| C | -5.40365900 | 1.75627600  | 1.98776900  |
| H | -5.90755200 | 2.93910900  | 0.26323700  |
| H | -4.60859700 | 0.53622100  | 3.56797200  |
| H | -6.39703100 | 1.80908600  | 2.41673100  |
| C | 2.71028900  | 1.83075400  | -0.87012500 |

|   |             |             |             |
|---|-------------|-------------|-------------|
| C | 3.07822200  | 1.15554700  | -2.03516200 |
| C | 3.67190400  | 2.59639200  | -0.20344600 |
| C | 4.37790400  | 1.23947700  | -2.52111200 |
| H | 2.33748700  | 0.55614000  | -2.55240600 |
| C | 4.97058200  | 2.68358800  | -0.69044400 |
| H | 3.39522800  | 3.11689700  | 0.70725000  |
| C | 5.32762600  | 2.00479900  | -1.85180000 |
| H | 4.64765400  | 0.70980800  | -3.42705000 |
| H | 5.70592600  | 3.27584000  | -0.15865900 |
| H | 6.34016400  | 2.07097900  | -2.23157300 |
| C | -1.40098400 | 4.12289100  | 0.60714000  |
| C | 1.09369400  | 4.21083600  | -0.63044100 |
| C | 0.42449300  | 5.36830300  | -0.35308100 |
| C | -0.81918000 | 5.32436100  | 0.31920000  |
| H | -2.35856800 | 4.10082400  | 1.10833200  |
| H | 2.05126300  | 4.25397000  | -1.13042300 |
| H | 0.85361500  | 6.32236200  | -0.63464500 |
| H | -1.31803000 | 6.24605100  | 0.59373600  |
| C | -4.93622700 | -2.00333800 | -1.16046600 |
| C | -5.68466100 | -1.28743600 | -0.02479500 |
| C | -5.04335300 | -1.16779700 | -2.44837400 |
| C | -5.60676000 | -3.35606400 | -1.41032500 |
| H | -5.62144000 | -1.86410400 | 0.90184600  |
| H | -5.27135200 | -0.29602000 | 0.16876000  |
| H | -6.74027500 | -1.16614100 | -0.28585600 |
| H | -4.48844100 | -1.64010900 | -3.26274100 |
| H | -6.09125100 | -1.08284800 | -2.74936700 |
| H | -4.65625800 | -0.15510900 | -2.31404800 |
| H | -6.65194200 | -3.19760700 | -1.68668100 |
| H | -5.12100900 | -3.90011100 | -2.22412400 |
| H | -5.58767900 | -3.98282300 | -0.51558900 |
| C | 5.02302900  | -1.90371000 | 1.08811200  |
| C | 5.81092100  | -2.60685500 | -0.03078800 |
| C | 5.57948800  | -0.48575400 | 1.24491700  |
| C | 5.22588700  | -2.65730200 | 2.41302500  |
| H | 5.48349900  | -3.63966000 | -0.16770200 |
| H | 5.67855000  | -2.07937100 | -0.97888400 |
| H | 6.87711300  | -2.61973700 | 0.21250900  |
| H | 5.06425400  | 0.06410800  | 2.03738000  |
| H | 6.63863700  | -0.53938300 | 1.50865200  |
| H | 5.49115500  | 0.08414800  | 0.31667400  |
| H | 6.28534900  | -2.65912000 | 2.68382400  |
| H | 4.66492100  | -2.17704000 | 3.21836400  |
| H | 4.89572500  | -3.69574500 | 2.34390900  |

|   |             |             |             |
|---|-------------|-------------|-------------|
| B | -1.32995000 | -3.39331100 | -0.29116400 |
| C | -0.62908000 | -2.02657500 | -0.10424000 |

B-3-PP

Energy (with Zero-point Energy correction) = -1686.037016 (-1685.349660) Hartree

Free energy (298 K) = -1685.417907 Hartree

Zero number of imaginary frequency

0 2

|   |             |             |             |
|---|-------------|-------------|-------------|
| C | -3.43849700 | -2.22855000 | -0.55666700 |
| C | -2.68916900 | -3.40571600 | -0.63334400 |
| C | -1.30537000 | -3.37526600 | -0.46831700 |
| C | -1.49210900 | -0.74917200 | -0.07640600 |
| C | -2.83896600 | -0.94385700 | -0.27407300 |
| C | -0.45501800 | -4.52678000 | -0.48635200 |
| C | 0.85250500  | -1.94948400 | -0.07384300 |
| C | 1.57539800  | -3.15894300 | 0.00614300  |
| C | 0.88529400  | -4.41867700 | -0.25489600 |
| C | 2.91863200  | -3.12322000 | 0.36355700  |
| H | 3.48080800  | -4.05097400 | 0.40792000  |
| C | 3.53167500  | -1.91213800 | 0.71652500  |
| C | 2.79664400  | -0.73118300 | 0.62260100  |
| C | 1.46824200  | -0.71895200 | 0.16002800  |
| C | 0.68068000  | 0.54579300  | -0.02097400 |
| C | -0.77679500 | 0.53986200  | 0.11617700  |
| H | -0.88172900 | -5.51075400 | -0.66543700 |
| H | -3.18990000 | -4.35038000 | -0.81687200 |
| H | -3.53824600 | -0.12345000 | -0.24188900 |
| H | 1.49410000  | -5.31825100 | -0.24866700 |
| H | 3.26137300  | 0.19344400  | 0.92367500  |
| C | -1.41805200 | 1.75484600  | 0.33126700  |
| C | 1.32455100  | 1.73796500  | -0.32687600 |
| C | 0.61689700  | 2.98356900  | -0.28077700 |
| C | -0.72374200 | 2.99476900  | 0.18301100  |
| C | -2.85402500 | 1.83626600  | 0.72494200  |
| C | -3.81222900 | 2.36175900  | -0.14552200 |
| C | -3.25105500 | 1.41197600  | 1.99296400  |
| C | -5.14654500 | 2.43996100  | 0.23773100  |
| H | -3.50393500 | 2.69662700  | -1.13027500 |
| C | -4.58304000 | 1.50412300  | 2.38254400  |
| H | -2.50765300 | 1.00297800  | 2.66777400  |
| C | -5.53465500 | 2.01377600  | 1.50493000  |
| H | -5.88238600 | 2.83869300  | -0.45070100 |
| H | -4.87873400 | 1.17298500  | 3.37109500  |

|   |             |             |             |
|---|-------------|-------------|-------------|
| H | -6.57346000 | 2.07843000  | 1.80591200  |
| C | 2.74838800  | 1.77968100  | -0.77881200 |
| C | 3.13449900  | 1.07383400  | -1.91912100 |
| C | 3.71078500  | 2.52755000  | -0.09374800 |
| C | 4.45327000  | 1.10241600  | -2.35763300 |
| H | 2.39305400  | 0.48850400  | -2.45140500 |
| C | 5.02848200  | 2.56165500  | -0.53397500 |
| H | 3.42010000  | 3.07522500  | 0.79657900  |
| C | 5.40494500  | 1.84557600  | -1.66659400 |
| H | 4.73696300  | 0.54539900  | -3.24277300 |
| H | 5.76386600  | 3.13975900  | 0.01334600  |
| H | 6.43274200  | 1.86832900  | -2.00871400 |
| C | -1.35596300 | 4.24705900  | 0.41854900  |
| C | 1.21181300  | 4.21873700  | -0.65597700 |
| C | 0.55587200  | 5.40711700  | -0.47039000 |
| C | -0.72887800 | 5.42427600  | 0.10947700  |
| H | -2.35101700 | 4.26528600  | 0.84222600  |
| H | 2.19860000  | 4.21979600  | -1.09734300 |
| H | 1.03014000  | 6.33624700  | -0.76296600 |
| H | -1.22716800 | 6.36822600  | 0.29491800  |
| C | -4.95659600 | -2.23690900 | -0.74594400 |
| C | -5.62667600 | -1.77404900 | 0.56141800  |
| C | -5.34031000 | -1.27230500 | -1.88517400 |
| C | -5.50338900 | -3.62428400 | -1.09876000 |
| H | -5.37045300 | -2.44772900 | 1.38309500  |
| H | -5.32051800 | -0.76439200 | 0.83981200  |
| H | -6.71384900 | -1.77671600 | 0.43934900  |
| H | -4.84693500 | -1.55974000 | -2.81693400 |
| H | -6.42169300 | -1.30720000 | -2.04377900 |
| H | -5.07065900 | -0.23916400 | -1.65828400 |
| H | -6.58491500 | -3.55893000 | -1.23773200 |
| H | -5.06816300 | -4.00514600 | -2.02599800 |
| H | -5.31458400 | -4.34753100 | -0.30201100 |
| C | 4.99537800  | -1.92259900 | 1.16753300  |
| C | 5.86741100  | -2.37475700 | -0.01659900 |
| C | 5.47705600  | -0.53909000 | 1.61395200  |
| C | 5.17411100  | -2.89728800 | 2.34338900  |
| H | 5.59281700  | -3.37527800 | -0.35817200 |
| H | 5.75303200  | -1.68409000 | -0.85634700 |
| H | 6.92094400  | -2.39296500 | 0.27699800  |
| H | 4.88636900  | -0.15924100 | 2.45209700  |
| H | 6.51777100  | -0.60716600 | 1.94036900  |
| H | 5.42749800  | 0.18495200  | 0.79750200  |
| H | 6.21666900  | -2.89574400 | 2.67317000  |

|   |             |             |             |
|---|-------------|-------------|-------------|
| H | 4.54570200  | -2.60155800 | 3.18700400  |
| H | 4.91270300  | -3.92112600 | 2.06966900  |
| B | -0.64558800 | -2.01068700 | -0.23639800 |

B-4-PP

Energy (with Zero-point Energy correction) = -1686.057713 (-1685.369977) Hartree

Free energy (298 K) = -1685.438045 Hartree

Zero number of imaginary frequency

0 2

|   |             |             |             |
|---|-------------|-------------|-------------|
| C | -3.62469500 | -2.00427100 | -0.55879500 |
| C | -2.80498000 | -3.16066200 | -0.59533700 |
| C | -3.05457500 | -0.77984900 | -0.28194100 |
| C | 0.67616100  | -1.95141900 | 0.02226700  |
| C | 1.37802600  | -3.18765000 | 0.08299400  |
| C | 0.66656100  | -4.39796700 | -0.18138200 |
| C | 2.74129900  | -3.20368700 | 0.42224400  |
| H | 3.25144300  | -4.16136400 | 0.44746500  |
| C | 3.40789100  | -2.04096100 | 0.75349100  |
| C | 2.70761000  | -0.82075000 | 0.64647500  |
| C | 1.39313900  | -0.73407900 | 0.21644500  |
| C | 0.72203800  | 0.58661000  | 0.03277400  |
| C | -0.71052800 | 0.66730800  | 0.22480300  |
| H | -1.20092800 | -5.31212300 | -0.62707000 |
| H | -3.26641800 | -4.12469600 | -0.78732700 |
| H | -3.71940800 | 0.07278600  | -0.27513900 |
| H | 1.21747800  | -5.33241600 | -0.16560700 |
| H | 3.22400700  | 0.08836000  | 0.90856000  |
| C | 1.43608500  | 1.72735200  | -0.32045900 |
| C | 0.79747300  | 3.01069300  | -0.27503800 |
| C | -0.53355500 | 3.11460900  | 0.21332000  |
| C | -2.71924600 | 2.03465800  | 0.79648100  |
| C | -3.64912300 | 2.67416100  | -0.02892100 |
| C | -3.15723800 | 1.46759900  | 1.99372900  |
| C | -4.99137000 | 2.72409300  | 0.32604500  |
| H | -3.31416300 | 3.10980400  | -0.96408200 |
| C | -4.49913500 | 1.52647500  | 2.35532200  |
| H | -2.43716700 | 0.97082900  | 2.63392900  |
| C | -5.41948500 | 2.15101000  | 1.52096700  |
| H | -5.70523800 | 3.20611400  | -0.33148400 |
| H | -4.82559800 | 1.08040800  | 3.28730500  |
| H | -6.46650900 | 2.19016500  | 1.79745800  |
| C | 2.84519000  | 1.67457400  | -0.81437900 |
| C | 3.15641400  | 0.92449600  | -1.94986200 |

|   |             |             |             |
|---|-------------|-------------|-------------|
| C | 3.87135100  | 2.37094100  | -0.16896900 |
| C | 4.46199400  | 0.86134200  | -2.42186000 |
| H | 2.36595600  | 0.37780500  | -2.45189500 |
| C | 5.17668300  | 2.31463600  | -0.64399400 |
| H | 3.64019900  | 2.95139500  | 0.71811400  |
| C | 5.47730400  | 1.55539100  | -1.77049800 |
| H | 4.68648600  | 0.27116600  | -3.30257500 |
| H | 5.96073300  | 2.85571400  | -0.12714500 |
| H | 6.49483000  | 1.50670700  | -2.13946800 |
| C | 1.45442800  | 4.20512000  | -0.68309100 |
| C | 0.87136400  | 5.43188300  | -0.50787400 |
| H | -2.06809900 | 4.48527500  | 0.88605700  |
| H | 2.43144600  | 4.14307700  | -1.14145100 |
| H | 1.39409100  | 6.32613600  | -0.82594800 |
| H | -0.83501200 | 6.51364100  | 0.27380300  |
| C | -5.12412000 | -2.19628700 | -0.82979500 |
| C | -5.89198500 | -0.87268800 | -0.77923600 |
| C | -5.31980400 | -2.81325200 | -2.22535900 |
| C | -5.71764700 | -3.13436700 | 0.23543900  |
| H | -5.81316200 | -0.39985900 | 0.20251900  |
| H | -5.52385900 | -0.16474500 | -1.52642700 |
| H | -6.94928400 | -1.05972400 | -0.98339400 |
| H | -4.84203300 | -3.79156100 | -2.31186900 |
| H | -6.38590200 | -2.94371200 | -2.43121300 |
| H | -4.89789500 | -2.16215100 | -2.99486000 |
| H | -6.78899700 | -3.26899400 | 0.06174100  |
| H | -5.25063000 | -4.12159900 | 0.21773800  |
| H | -5.58063300 | -2.71297100 | 1.23438500  |
| C | 4.88116100  | -2.09458000 | 1.16860000  |
| C | 5.71344000  | -2.54672500 | -0.04374800 |
| C | 5.40542600  | -0.73031300 | 1.62745900  |
| C | 5.06460500  | -3.09424700 | 2.32205900  |
| H | 5.40635500  | -3.53587300 | -0.39093200 |
| H | 5.59311100  | -1.84170800 | -0.87068900 |
| H | 6.77354200  | -2.59181900 | 0.22242100  |
| H | 4.83139100  | -0.34339800 | 2.47399200  |
| H | 6.44602000  | -0.83187300 | 1.94535200  |
| H | 5.37286800  | 0.00429300  | 0.81966600  |
| H | 6.11515300  | -3.12632000 | 2.62368600  |
| H | 4.46655100  | -2.79827300 | 3.18733400  |
| H | 4.76889300  | -4.10542000 | 2.03647200  |
| C | -1.28910500 | 1.91838500  | 0.40316200  |
| C | -1.08637100 | 4.40535400  | 0.43840900  |
| C | -0.39913600 | 5.53801000  | 0.09566300  |

|   |             |             |             |
|---|-------------|-------------|-------------|
| C | -0.66912800 | -4.38664400 | -0.43215600 |
| C | -1.39878400 | -3.15608400 | -0.40705100 |
| C | -0.72804700 | -1.94523000 | -0.17795800 |
| B | -1.53502500 | -0.64420000 | -0.02641900 |

B-5-PP

Energy (with Zero-point Energy correction) = -1686.063472 (-1685.375525) Hartree

Free energy (298 K) = -1685.444349 Hartree

Zero number of imaginary frequency

0 2

|   |             |             |             |
|---|-------------|-------------|-------------|
| C | -3.41352800 | -2.23689300 | -0.65448600 |
| C | -2.59472100 | -3.34670400 | -0.69868600 |
| C | -1.45431700 | -0.85705600 | -0.07539300 |
| C | -2.81416200 | -1.00584300 | -0.32789000 |
| C | -0.40102500 | -4.44748300 | -0.47367200 |
| C | 0.81024800  | -1.93557600 | 0.05466200  |
| C | 1.55981600  | -3.13718200 | 0.09845100  |
| C | 0.91755500  | -4.38962500 | -0.18941700 |
| C | 2.92497200  | -3.10740900 | 0.42217600  |
| H | 3.46277600  | -4.05022000 | 0.43717000  |
| C | 3.56956500  | -1.92506900 | 0.73797900  |
| C | 2.82933000  | -0.73834300 | 0.64319500  |
| C | 1.49429000  | -0.70352700 | 0.25056300  |
| C | 0.75280300  | 0.56716600  | 0.08777500  |
| H | -0.88068600 | -5.39427800 | -0.69772700 |
| H | -3.00042300 | -4.32675400 | -0.92288500 |
| H | -3.45040200 | -0.13203500 | -0.28208900 |
| H | 1.52274000  | -5.28966400 | -0.17488700 |
| H | 3.31211600  | 0.19511200  | 0.88494100  |
| C | -1.52004300 | 1.85364500  | 0.44413600  |
| C | 1.31715300  | 1.75649700  | -0.29968200 |
| C | 0.53479500  | 3.00239300  | -0.32239000 |
| C | -0.81520000 | 3.05780300  | 0.16341900  |
| C | -2.92583000 | 1.90000600  | 0.89530900  |
| C | -3.92909700 | 2.50751300  | 0.12806000  |
| C | -3.29126000 | 1.25909000  | 2.08529700  |
| C | -5.25589600 | 2.47436500  | 0.54086300  |
| H | -3.66263900 | 2.98090100  | -0.81060900 |
| C | -4.61323300 | 1.25233400  | 2.51134100  |
| H | -2.52622000 | 0.76490800  | 2.67355100  |
| C | -5.60081100 | 1.85635100  | 1.73900100  |
| H | -6.02115300 | 2.93345700  | -0.07381000 |
| H | -4.87545200 | 0.76099900  | 3.44076700  |
| H | -6.63432900 | 1.83600400  | 2.06322500  |

|   |             |             |             |
|---|-------------|-------------|-------------|
| C | 2.73969100  | 1.85523900  | -0.75256300 |
| C | 3.15497600  | 1.15693200  | -1.88651700 |
| C | 3.67580300  | 2.62001600  | -0.05057900 |
| C | 4.47929300  | 1.21348400  | -2.30601500 |
| H | 2.43359100  | 0.55358700  | -2.42604800 |
| C | 4.99985900  | 2.67789500  | -0.46958300 |
| H | 3.36030400  | 3.16288000  | 0.83430700  |
| C | 5.40600300  | 1.97285300  | -1.59882000 |
| H | 4.78744100  | 0.66322000  | -3.18720900 |
| H | 5.71626300  | 3.26781900  | 0.09008700  |
| H | 6.43840700  | 2.01517600  | -1.92478700 |
| C | -1.42138800 | 4.33246300  | 0.32698400  |
| C | 1.11165100  | 4.19413200  | -0.78670500 |
| C | 0.45867300  | 5.41271000  | -0.68834600 |
| C | -0.80182400 | 5.48887800  | -0.08933400 |
| H | -2.39912400 | 4.38748400  | 0.78682900  |
| H | 2.09803700  | 4.16998000  | -1.22840000 |
| H | 0.94205200  | 6.30875800  | -1.05881400 |
| H | -1.29271200 | 6.44604000  | 0.03711500  |
| C | -4.91850500 | -2.28676600 | -0.92066600 |
| C | -5.66718600 | -1.83169200 | 0.34326700  |
| C | -5.26292900 | -1.33836700 | -2.08171500 |
| C | -5.39171900 | -3.69560900 | -1.28911200 |
| H | -5.43378500 | -2.48767300 | 1.18593600  |
| H | -5.39632100 | -0.81120300 | 0.62308900  |
| H | -6.74729000 | -1.86056500 | 0.17118100  |
| H | -4.72574000 | -1.62632900 | -2.98872700 |
| H | -6.33618800 | -1.37588900 | -2.28900700 |
| H | -5.00323300 | -0.30400400 | -1.84524600 |
| H | -6.46751000 | -3.68063600 | -1.47917300 |
| H | -4.89620800 | -4.06136800 | -2.19228200 |
| H | -5.20621700 | -4.40573500 | -0.47916500 |
| C | 5.05249400  | -1.93351900 | 1.11880000  |
| C | 5.86993000  | -2.38411700 | -0.10379600 |
| C | 5.54857300  | -0.54721400 | 1.54190000  |
| C | 5.28798200  | -2.90789100 | 2.28401400  |
| H | 5.58191100  | -3.38655500 | -0.42834100 |
| H | 5.71184100  | -1.69691300 | -0.93932800 |
| H | 6.93672100  | -2.39689600 | 0.13829500  |
| H | 4.98779300  | -0.16523500 | 2.39942900  |
| H | 6.60097900  | -0.61172900 | 1.82952500  |
| H | 5.46756900  | 0.17466300  | 0.72563500  |
| H | 6.34584300  | -2.91094300 | 2.56133900  |
| H | 4.70321300  | -2.61114400 | 3.15807900  |

|   |             |             |             |
|---|-------------|-------------|-------------|
| H | 5.00828600  | -3.93002100 | 2.02175700  |
| C | -0.61850300 | -2.00855900 | -0.17520700 |
| C | -1.20824300 | -3.26034400 | -0.45583300 |
| B | -0.78369600 | 0.51458600  | 0.20831400  |

B-6-PP

Energy (with Zero-point Energy correction) = -1686.073100 (-1685.385307) Hartree

Free energy (298 K) = -1685.453423 Hartree

Zero number of imaginary frequency

0 2

|   |             |             |             |
|---|-------------|-------------|-------------|
| C | 3.38641600  | -2.13218200 | 0.76893000  |
| C | 2.62024900  | -3.28991100 | 0.74596200  |
| C | 1.38247900  | -0.81445700 | 0.22731000  |
| C | 2.74889600  | -0.91523300 | 0.50964100  |
| C | -0.79347500 | -1.95135500 | 0.00452300  |
| C | -1.53092100 | -3.15786100 | -0.10588300 |
| C | -0.86526200 | -4.40710300 | 0.15012400  |
| C | -2.87732800 | -3.10938800 | -0.47116200 |
| H | -3.42332600 | -4.04487300 | -0.54017800 |
| C | -3.50144200 | -1.90520400 | -0.77674500 |
| C | -2.76961900 | -0.72449700 | -0.62132800 |
| C | -1.44711900 | -0.70844400 | -0.17085000 |
| C | -0.67571500 | 0.53684400  | 0.04129400  |
| C | 0.74167800  | 0.46784900  | -0.00149100 |
| H | 0.94514700  | -5.39555500 | 0.64422600  |
| H | 3.07298500  | -4.25880300 | 0.92044800  |
| H | 3.33665600  | -0.01101100 | 0.54531600  |
| H | -1.44883100 | -5.31934000 | 0.08936700  |
| H | -3.24328900 | 0.21102500  | -0.86805200 |
| C | -1.30774900 | 1.77315200  | 0.34413400  |
| C | -0.58526700 | 3.03498700  | 0.36009600  |
| C | 0.75815300  | 3.09158900  | -0.09742400 |
| C | 2.96508900  | 1.76691000  | -0.95264500 |
| C | 4.04140700  | 2.47490200  | -0.39738500 |
| C | 3.20785900  | 1.04053700  | -2.12814200 |
| C | 5.30140300  | 2.46131500  | -0.98950000 |
| H | 3.89698100  | 3.03293500  | 0.52278700  |
| C | 4.45586700  | 1.04702700  | -2.74027300 |
| H | 2.40301800  | 0.46013100  | -2.56861500 |
| C | 5.50851100  | 1.75710400  | -2.17082000 |
| H | 6.11912500  | 3.00627300  | -0.53189400 |
| H | 4.61134100  | 0.48772100  | -3.65560000 |
| H | 6.48558500  | 1.75393600  | -2.63945100 |

|   |             |             |             |
|---|-------------|-------------|-------------|
| C | -2.72958200 | 1.80956000  | 0.78489000  |
| C | -3.13284300 | 1.07058100  | 1.89967300  |
| C | -3.68034300 | 2.58408000  | 0.11129700  |
| C | -4.45447400 | 1.09979700  | 2.32717600  |
| H | -2.40211300 | 0.46387700  | 2.42254700  |
| C | -5.00270500 | 2.61135500  | 0.53741200  |
| H | -3.37634900 | 3.15629600  | -0.75859900 |
| C | -5.39429500 | 1.86831500  | 1.64699300  |
| H | -4.75043900 | 0.52217700  | 3.19481000  |
| H | -5.72898200 | 3.20793700  | -0.00194000 |
| H | -6.42521600 | 1.88852400  | 1.97954700  |
| C | 1.36898200  | 4.34580400  | -0.23629000 |
| C | -1.20122500 | 4.22747800  | 0.79889500  |
| C | -0.55035400 | 5.44384200  | 0.69551700  |
| C | 0.72924900  | 5.51524300  | 0.14538100  |
| H | 2.37107800  | 4.39872000  | -0.64518100 |
| H | -2.19310400 | 4.20295000  | 1.22791900  |
| H | -1.04646300 | 6.34454500  | 1.03781200  |
| H | 1.22497400  | 6.47241700  | 0.03581000  |
| C | 4.89030400  | -2.12546600 | 1.05150800  |
| C | 5.62276600  | -1.48829600 | -0.14168500 |
| C | 5.16502200  | -1.29515800 | 2.31664100  |
| C | 5.44146500  | -3.53753500 | 1.26784400  |
| H | 5.42853400  | -2.05016600 | -1.05907000 |
| H | 5.30536500  | -0.45631200 | -0.30837300 |
| H | 6.70155000  | -1.48409200 | 0.03984300  |
| H | 4.63785500  | -1.71415200 | 3.17732800  |
| H | 6.23649600  | -1.29082400 | 2.53572600  |
| H | 4.84383800  | -0.25873400 | 2.19160800  |
| H | 6.51610700  | -3.48338500 | 1.45663700  |
| H | 4.97531500  | -4.02407600 | 2.12867200  |
| H | 5.28809100  | -4.16655700 | 0.38710100  |
| C | -4.96376300 | -1.90264400 | -1.23145400 |
| C | -5.83861700 | -2.41772600 | -0.07586800 |
| C | -5.45042100 | -0.50090800 | -1.61123100 |
| C | -5.13067600 | -2.82004500 | -2.45375500 |
| H | -5.56104400 | -3.43328700 | 0.21499500  |
| H | -5.73052300 | -1.77117000 | 0.79900100  |
| H | -6.89102700 | -2.42507600 | -0.37388000 |
| H | -4.85724800 | -0.07668400 | -2.42607000 |
| H | -6.48901700 | -0.55738900 | -1.94637600 |
| H | -5.40907800 | 0.18233900  | -0.75967000 |
| H | -6.17255800 | -2.81444900 | -2.78575400 |
| H | -4.50371200 | -2.47738700 | -3.28048300 |

|   |             |             |             |
|---|-------------|-------------|-------------|
| H | -4.85738800 | -3.85258200 | -2.22798500 |
| C | 0.60890500  | -2.00605100 | 0.26388900  |
| C | 1.23970900  | -3.24738800 | 0.49866200  |
| B | 1.51917100  | 1.76810900  | -0.32677100 |
| C | 0.45108900  | -4.44915300 | 0.45272700  |

B-7-PP

Energy (with Zero-point Energy correction) = -1686.040196 (-1685.353056) Hartree

Free energy (298 K) = -1685.420332 Hartree

Zero number of imaginary frequency

0 2

|   |             |             |             |
|---|-------------|-------------|-------------|
| C | 3.46038200  | -2.00321300 | 0.82673700  |
| C | 2.76301800  | -3.18540700 | 0.64782500  |
| C | 2.78306400  | -0.79174400 | 0.60625500  |
| C | 0.66035400  | -4.39915400 | 0.14148600  |
| C | -0.66712300 | -1.92263000 | -0.15284000 |
| C | -1.35874300 | -3.13954800 | -0.34913700 |
| C | -0.64994800 | -4.38081100 | -0.19173900 |
| C | -2.71767600 | -3.11393300 | -0.68311700 |
| H | -3.22594800 | -4.06282700 | -0.82327500 |
| C | -3.40607900 | -1.91745400 | -0.85550900 |
| C | -2.72063000 | -0.72750700 | -0.61163400 |
| C | -1.37653400 | -0.69126400 | -0.20388200 |
| C | -0.68252500 | 0.55914900  | 0.08183300  |
| H | 1.18385300  | -5.33964900 | 0.27468500  |
| H | 3.24894200  | -4.14479700 | 0.77823600  |
| H | 3.32049200  | 0.13311500  | 0.75712500  |
| H | -1.19823900 | -5.30541100 | -0.33530700 |
| H | -3.23856000 | 0.20495700  | -0.75839500 |
| C | 1.41615100  | 1.71322700  | -0.40816200 |
| C | -1.39901200 | 1.77485200  | 0.41419100  |
| C | -0.77193900 | 3.00524900  | 0.29625100  |
| C | 2.79373800  | 1.71962900  | -0.95691600 |
| C | 3.77038500  | 2.58429300  | -0.44946500 |
| C | 3.12699200  | 0.90477100  | -2.04687100 |
| C | 5.04638900  | 2.61939700  | -1.00282200 |
| H | 3.52435100  | 3.22428700  | 0.39069400  |
| C | 4.39384600  | 0.95545100  | -2.61107700 |
| H | 2.37582500  | 0.23487500  | -2.45047200 |
| C | 5.36102300  | 1.81064200  | -2.08938700 |
| H | 5.79263100  | 3.28679800  | -0.58785100 |
| H | 4.62844200  | 0.32478500  | -3.46059000 |
| H | 6.35132400  | 1.84606800  | -2.52730400 |

|   |             |             |             |
|---|-------------|-------------|-------------|
| C | -2.77848200 | 1.69026900  | 0.97952400  |
| C | -3.03672200 | 0.87007200  | 2.08133900  |
| C | -3.82936900 | 2.43844500  | 0.43955700  |
| C | -4.31158800 | 0.79872900  | 2.62809100  |
| H | -2.22945500 | 0.28193200  | 2.50375400  |
| C | -5.10521600 | 2.36864200  | 0.98730000  |
| H | -3.64070300 | 3.06562800  | -0.42482000 |
| C | -5.35093900 | 1.54702900  | 2.08256300  |
| H | -4.49373700 | 0.15993400  | 3.48414600  |
| H | -5.90945800 | 2.95005600  | 0.55192800  |
| H | -6.34536500 | 1.49023400  | 2.50883500  |
| C | 1.19323800  | 4.44280500  | -0.67839800 |
| C | -1.37744300 | 4.25481600  | 0.70223000  |
| C | -0.77867800 | 5.43715800  | 0.41751000  |
| C | 0.47441800  | 5.53260900  | -0.30456600 |
| H | 2.13111500  | 4.60429800  | -1.20196000 |
| H | -2.31337200 | 4.25883100  | 1.24876300  |
| H | -1.25151700 | 6.35997400  | 0.73559400  |
| H | 0.83391600  | 6.53522300  | -0.52378800 |
| C | 4.93258000  | -1.95069700 | 1.23768400  |
| C | 5.72643100  | -1.17995800 | 0.16896200  |
| C | 5.05478500  | -1.22295800 | 2.58711300  |
| C | 5.53935700  | -3.34894300 | 1.38346600  |
| H | 5.63847100  | -1.66854400 | -0.80500000 |
| H | 5.37047700  | -0.15314600 | 0.05821600  |
| H | 6.78464300  | -1.14280200 | 0.44352600  |
| H | 4.48852600  | -1.74644700 | 3.36136400  |
| H | 6.10332100  | -1.17993400 | 2.89476800  |
| H | 4.68029700  | -0.19902100 | 2.52584900  |
| H | 6.58994000  | -3.26114200 | 1.66974900  |
| H | 5.02985100  | -3.92985900 | 2.15662700  |
| H | 5.49413100  | -3.90491100 | 0.44341500  |
| C | -4.88146500 | -1.94127600 | -1.26349500 |
| C | -5.68824300 | -2.63590000 | -0.15315300 |
| C | -5.44988800 | -0.53223300 | -1.45581600 |
| C | -5.04175000 | -2.71639000 | -2.58125100 |
| H | -5.35327200 | -3.66334700 | 0.00562300  |
| H | -5.58257000 | -2.09309300 | 0.78974500  |
| H | -6.74833800 | -2.66331400 | -0.42035500 |
| H | -4.91481700 | 0.01539500  | -2.23662600 |
| H | -6.49807800 | -0.60358500 | -1.75596400 |
| H | -5.40388100 | 0.04845700  | -0.53112300 |
| H | -6.09368600 | -2.73401100 | -2.87892500 |
| H | -4.46577900 | -2.24243700 | -3.37971100 |

|   |             |             |             |
|---|-------------|-------------|-------------|
| H | -4.70331500 | -3.75038800 | -2.48815300 |
| C | 0.73345400  | -1.94733100 | 0.12615600  |
| C | 1.39910600  | -3.17853900 | 0.31205600  |
| C | 1.45616300  | -0.73626300 | 0.20617600  |
| C | 0.76300900  | 0.54709200  | -0.04270500 |
| B | 0.64644200  | 3.05935800  | -0.31344300 |

B-8-PP

Energy (with Zero-point Energy correction) = -1686.047932 (-1685.362130) Hartree

Free energy (298 K) = -1685.429697 Hartree

Zero number of imaginary frequency

0 2

|   |             |             |             |
|---|-------------|-------------|-------------|
| C | -3.43444400 | -2.05286900 | -0.75538000 |
| C | -2.71359500 | -3.22947400 | -0.63582600 |
| C | -1.42700000 | -0.77150900 | -0.15236200 |
| C | -2.77204900 | -0.84265500 | -0.50784600 |
| C | 0.72777300  | -1.95888400 | 0.09297100  |
| C | 1.43325000  | -3.17955900 | 0.23614100  |
| C | 0.72612200  | -4.41946100 | 0.06055100  |
| C | 2.79688100  | -3.15628400 | 0.53748900  |
| H | 3.31568700  | -4.10475600 | 0.63446500  |
| C | 3.47448200  | -1.95966900 | 0.73458400  |
| C | 2.77053900  | -0.76635900 | 0.54988800  |
| C | 1.42569400  | -0.73307700 | 0.17367300  |
| C | 0.68731700  | 0.52887700  | -0.03842900 |
| C | -0.73019400 | 0.50591700  | 0.08066100  |
| H | -1.11700000 | -5.37140800 | -0.37935600 |
| H | -3.18744700 | -4.19197100 | -0.78661000 |
| H | -3.33485700 | 0.07031300  | -0.61730100 |
| H | 1.28258100  | -5.34513300 | 0.15929400  |
| H | 3.28483200  | 0.16366100  | 0.72018200  |
| C | 1.32099700  | 1.75398200  | -0.34265800 |
| C | 0.58016700  | 2.95689300  | -0.27866000 |
| C | -0.74720800 | 2.95266200  | 0.25094500  |
| C | -2.79687200 | 1.72535400  | 0.91282000  |
| C | -3.81341300 | 2.45265900  | 0.28998600  |
| C | -3.08908700 | 1.03201000  | 2.08894400  |
| C | -5.09160700 | 2.49536700  | 0.83568000  |
| H | -3.59429700 | 2.98604200  | -0.62889700 |
| C | -4.36295800 | 1.08327600  | 2.64138400  |
| H | -2.30569700 | 0.45982500  | 2.57350300  |
| C | -5.36781000 | 1.81678200  | 2.01790500  |
| H | -5.86899900 | 3.06505600  | 0.34051000  |

|   |             |             |             |
|---|-------------|-------------|-------------|
| H | -4.57085000 | 0.55110400  | 3.56204700  |
| H | -6.36146500 | 1.85423500  | 2.44808000  |
| C | 2.73363200  | 1.81203300  | -0.81810000 |
| C | 3.11309600  | 1.10703800  | -1.96235900 |
| C | 3.69178900  | 2.58246300  | -0.15266300 |
| C | 4.42034000  | 1.16897400  | -2.42912700 |
| H | 2.37521800  | 0.50351100  | -2.47897200 |
| C | 4.99969700  | 2.64590900  | -0.62021400 |
| H | 3.40480800  | 3.12590200  | 0.74130600  |
| C | 5.36774100  | 1.93896000  | -1.76034500 |
| H | 4.69893300  | 0.61843600  | -3.31982200 |
| H | 5.73202900  | 3.24311300  | -0.08994300 |
| H | 6.38672500  | 1.98652800  | -2.12528800 |
| C | 1.14290800  | 4.19312200  | -0.73658300 |
| C | 0.53298100  | 5.44066500  | -0.55428700 |
| C | -0.65658200 | 5.57416000  | 0.13163600  |
| H | -2.32804000 | 4.40092100  | 1.34700400  |
| H | 2.08188900  | 4.15925800  | -1.27282000 |
| H | 1.04770200  | 6.30899900  | -0.95564900 |
| H | -1.04526600 | 6.57713800  | 0.28068000  |
| C | -4.91773500 | -2.01445300 | -1.12859500 |
| C | -5.70456700 | -1.34593700 | 0.01074000  |
| C | -5.09774300 | -1.19585100 | -2.41821800 |
| C | -5.48847700 | -3.41614100 | -1.36144200 |
| H | -5.58091500 | -1.90171900 | 0.94394900  |
| H | -5.36833500 | -0.32173800 | 0.18455800  |
| H | -6.76998900 | -1.31559200 | -0.23592000 |
| H | -4.52906600 | -1.63762500 | -3.24014900 |
| H | -6.15383000 | -1.17303700 | -2.70124800 |
| H | -4.76384100 | -0.16403000 | -2.28889200 |
| H | -6.54524400 | -3.33837700 | -1.62717800 |
| H | -4.97444100 | -3.92919200 | -2.17843900 |
| H | -5.41546000 | -4.03312200 | -0.46215600 |
| C | 4.95886800  | -1.97783000 | 1.11013700  |
| C | 5.75129400  | -2.62539200 | -0.03829000 |
| C | 5.51546800  | -0.56928500 | 1.33869500  |
| C | 5.15722500  | -2.79424900 | 2.39750100  |
| H | 5.42350400  | -3.65040400 | -0.22463400 |
| H | 5.62047700  | -2.05343200 | -0.96057400 |
| H | 6.81703700  | -2.64929100 | 0.20638600  |
| H | 4.99245700  | -0.05594000 | 2.15032000  |
| H | 6.57150400  | -0.63748800 | 1.61128200  |
| H | 5.43984700  | 0.04350900  | 0.43694400  |
| H | 6.21537400  | -2.80788500 | 2.67312100  |

|   |             |             |             |
|---|-------------|-------------|-------------|
| H | 4.59161200  | -2.35511900 | 3.22283000  |
| H | 4.82915700  | -3.82851900 | 2.27601100  |
| C | -0.68380300 | -1.97871400 | -0.13709300 |
| C | -1.34356600 | -3.21202600 | -0.33947000 |
| C | -0.59227800 | -4.43365100 | -0.23225000 |
| C | -1.40333800 | 1.72242300  | 0.37883900  |
| B | -1.37198900 | 4.32220900  | 0.64710900  |

B-9-PP

Energy (with Zero-point Energy correction) = -1686.041128 (-1685.355265) Hartree

Free energy (298 K) = -1685.422702 Hartree

Zero number of imaginary frequency

0 2

|   |             |             |             |
|---|-------------|-------------|-------------|
| C | -3.45177400 | -2.03280800 | -0.74679300 |
| C | -2.74021400 | -3.21074200 | -0.59557600 |
| C | -1.44199200 | -0.75220700 | -0.15590700 |
| C | -2.78282000 | -0.82059100 | -0.52032200 |
| C | 0.70428900  | -1.94265000 | 0.12445400  |
| C | 1.40234900  | -3.16352100 | 0.29311000  |
| C | 0.68961000  | -4.40358400 | 0.14351700  |
| C | 2.76646100  | -3.14228600 | 0.59344500  |
| H | 3.27856700  | -4.09203200 | 0.71118900  |
| C | 3.45417600  | -1.94647900 | 0.76248800  |
| C | 2.76005200  | -0.75345900 | 0.54903400  |
| C | 1.41181300  | -0.71774000 | 0.17562100  |
| C | 0.68599300  | 0.53980300  | -0.05945200 |
| C | -0.73447400 | 0.52632800  | 0.06208200  |
| H | -1.15664700 | -5.35616000 | -0.28210100 |
| H | -3.21901800 | -4.17319900 | -0.72939600 |
| H | -3.33827400 | 0.09399700  | -0.65472300 |
| H | 1.24168300  | -5.32934800 | 0.26334800  |
| H | 3.28217100  | 0.17627100  | 0.69498100  |
| C | 1.33551100  | 1.76869500  | -0.37527400 |
| C | 0.63657700  | 2.97389000  | -0.28754600 |
| C | -0.69040200 | 2.97395200  | 0.26630700  |
| C | -2.78656400 | 1.76442200  | 0.87964500  |
| C | -3.78634700 | 2.49689900  | 0.23243000  |
| C | -3.10358000 | 1.08603500  | 2.05822900  |
| C | -5.07301500 | 2.55330500  | 0.75596800  |
| H | -3.54637500 | 3.02289500  | -0.68534700 |
| C | -4.38726800 | 1.15097800  | 2.58676100  |
| H | -2.33292400 | 0.51172800  | 2.56001700  |
| C | -5.37486100 | 1.88631700  | 1.93923600  |

|   |             |             |             |
|---|-------------|-------------|-------------|
| H | -5.83770400 | 3.12344400  | 0.24201100  |
| H | -4.61571500 | 0.62758300  | 3.50748300  |
| H | -6.37563900 | 1.93498000  | 2.35124100  |
| C | 2.73963300  | 1.78422100  | -0.88493600 |
| C | 3.07233600  | 1.05048900  | -2.02500200 |
| C | 3.73439400  | 2.53401900  | -0.25126300 |
| C | 4.37076600  | 1.06457200  | -2.51998000 |
| H | 2.30607100  | 0.46224700  | -2.51753500 |
| C | 5.03269600  | 2.55113700  | -0.74771400 |
| H | 3.48265400  | 3.10201700  | 0.63795200  |
| C | 5.35488000  | 1.81515800  | -1.88353900 |
| H | 4.61332200  | 0.49220200  | -3.40741800 |
| H | 5.79333400  | 3.13517500  | -0.24329900 |
| H | 6.36665100  | 1.82638900  | -2.27082800 |
| C | 1.23831100  | 4.23549800  | -0.71588300 |
| C | 0.71596100  | 5.45165200  | -0.43681900 |
| H | -2.19086100 | 4.14657900  | 1.22516300  |
| H | 2.14954400  | 4.15469600  | -1.29764600 |
| H | 1.24706000  | 6.31940900  | -0.81704400 |
| H | -1.05652900 | 6.57119400  | 0.74520500  |
| C | -4.93085800 | -1.99363000 | -1.13609300 |
| C | -5.72498400 | -1.29036300 | -0.02315600 |
| C | -5.09104000 | -1.20780000 | -2.44852400 |
| C | -5.50981200 | -3.39671900 | -1.33839800 |
| H | -5.61410100 | -1.82155500 | 0.92586800  |
| H | -5.38418900 | -0.26391200 | 0.12617400  |
| H | -6.78763700 | -1.26031300 | -0.28133800 |
| H | -4.51785900 | -1.67584500 | -3.25252800 |
| H | -6.14393300 | -1.18381900 | -2.74301800 |
| H | -4.74941800 | -0.17576300 | -2.34329800 |
| H | -6.56350500 | -3.31817500 | -1.61579300 |
| H | -4.99233400 | -3.93398100 | -2.13738200 |
| H | -5.44935100 | -3.99114000 | -0.42313700 |
| C | 4.93824900  | -1.96951900 | 1.13864400  |
| C | 5.72468100  | -2.64816000 | 0.00410400  |
| C | 5.50675000  | -0.56139900 | 1.33738800  |
| C | 5.12915900  | -2.76011800 | 2.44316200  |
| H | 5.38862400  | -3.67429200 | -0.16023500 |
| H | 5.59856300  | -2.09486400 | -0.93012100 |
| H | 6.79015700  | -2.67567600 | 0.24930600  |
| H | 4.98591200  | -0.02506100 | 2.13548200  |
| H | 6.56117500  | -0.63304800 | 1.61509900  |
| H | 5.43986900  | 0.03132300  | 0.42183700  |
| H | 6.18710100  | -2.77671000 | 2.71912100  |

|   |             |             |             |
|---|-------------|-------------|-------------|
| H | 4.56749200  | -2.29859000 | 3.25891600  |
| H | 4.79280100  | -3.79412400 | 2.34401300  |
| C | -0.70652900 | -1.96153200 | -0.10939200 |
| C | -1.37202400 | -3.19527700 | -0.28994100 |
| C | -0.62796100 | -4.41801400 | -0.15304200 |
| C | -1.38835100 | 1.73317800  | 0.36454300  |
| B | -0.57610000 | 5.54263400  | 0.38369900  |
| C | -1.25315100 | 4.19843400  | 0.68426500  |

1-H-PP-S1

Energy (with Zero-point Energy correction) = -1699.216953 (-1698.528874) Hartree

Free energy (298 K) = -1698.595057 Hartree

Zero number of imaginary frequency

0 1

|   |             |             |             |
|---|-------------|-------------|-------------|
| C | -3.40496900 | -2.11045900 | -0.72368300 |
| C | -2.69783700 | -3.26759500 | -0.44770200 |
| C | -1.43174400 | -0.76577800 | -0.15299300 |
| C | -2.74844600 | -0.87362100 | -0.57173500 |
| C | -0.58609100 | -4.41386400 | 0.14208700  |
| C | 0.70272800  | -1.91230400 | 0.28503700  |
| C | 1.42980300  | -3.10379500 | 0.50096300  |
| C | 0.73748100  | -4.35720700 | 0.43615900  |
| C | 2.81001600  | -3.04425900 | 0.74875900  |
| H | 3.34102600  | -3.97841600 | 0.90066500  |
| C | 3.49270300  | -1.82548500 | 0.82343900  |
| C | 2.78708600  | -0.65794700 | 0.58033800  |
| C | 1.39426600  | -0.65268000 | 0.24447800  |
| C | 0.68822500  | 0.53349100  | -0.08781900 |
| C | -0.74677900 | 0.52744900  | 0.02896800  |
| H | -1.09577700 | -5.36866100 | 0.07215100  |
| H | -3.16841900 | -4.24027200 | -0.52452700 |
| H | -3.29810600 | 0.02807600  | -0.79898400 |
| H | 1.30379700  | -5.26635600 | 0.60694500  |
| H | 3.28095400  | 0.29056200  | 0.70692600  |
| C | -1.38862900 | 1.71127800  | 0.35605800  |
| C | 1.36996100  | 1.78473600  | -0.40110300 |
| C | 0.67552900  | 3.01365000  | -0.16720500 |
| C | -0.65687600 | 2.96907600  | 0.35695500  |
| C | -2.81037300 | 1.75092200  | 0.79726900  |
| C | -3.76997500 | 2.49299000  | 0.09968900  |
| C | -3.20097800 | 1.07221800  | 1.95447500  |
| C | -5.08386300 | 2.55603800  | 0.54975900  |
| H | -3.47500700 | 3.02373700  | -0.79940400 |

|   |             |             |             |
|---|-------------|-------------|-------------|
| C | -4.51312300 | 1.14027300  | 2.40814400  |
| H | -2.46279400 | 0.49248300  | 2.49730000  |
| C | -5.45851700 | 1.88461600  | 1.71009900  |
| H | -5.81491900 | 3.13269200  | -0.00480500 |
| H | -4.79640400 | 0.61314700  | 3.31158000  |
| H | -6.48105800 | 1.93747900  | 2.06420000  |
| C | 2.68241800  | 1.73460700  | -1.01594100 |
| C | 2.99984600  | 0.69910900  | -1.93293400 |
| C | 3.73034700  | 2.62703400  | -0.67230200 |
| C | 4.25527600  | 0.61244900  | -2.51819300 |
| H | 2.22605300  | -0.00529100 | -2.21304000 |
| C | 4.98301700  | 2.51865800  | -1.24405200 |
| H | 3.56234500  | 3.36349400  | 0.10311100  |
| C | 5.25460400  | 1.51997100  | -2.18679600 |
| H | 4.45203000  | -0.17459300 | -3.23700500 |
| H | 5.76795500  | 3.20107900  | -0.93913500 |
| H | 6.23738900  | 1.44427300  | -2.63579000 |
| C | -1.25453100 | 4.16461900  | 0.77985100  |
| C | 1.20363700  | 4.28682200  | -0.48953400 |
| C | 0.56315000  | 5.45596000  | -0.11375100 |
| C | -0.64429200 | 5.39744000  | 0.57583100  |
| H | -2.22569600 | 4.13172300  | 1.25484600  |
| H | 2.12028800  | 4.35604500  | -1.05640900 |
| H | 1.00826200  | 6.41245100  | -0.36016300 |
| H | -1.13134000 | 6.30343000  | 0.91469200  |
| C | -4.86487700 | -2.11195200 | -1.17804800 |
| C | -5.70523300 | -1.29873900 | -0.17947700 |
| C | -4.96150100 | -1.46358900 | -2.56977300 |
| C | -5.44104700 | -3.52812000 | -1.26233900 |
| H | -5.63774300 | -1.72865700 | 0.82337500  |
| H | -5.37036000 | -0.26124300 | -0.12025800 |
| H | -6.75527600 | -1.29848500 | -0.48647200 |
| H | -4.36046000 | -2.01577000 | -3.29632800 |
| H | -6.00090400 | -1.46284900 | -2.90984500 |
| H | -4.61217700 | -0.42901900 | -2.55568900 |
| H | -6.48313000 | -3.47716600 | -1.58618400 |
| H | -4.89616900 | -4.14190300 | -1.98423400 |
| H | -5.41710100 | -4.02878800 | -0.29098600 |
| C | 4.99193600  | -1.81528200 | 1.13165200  |
| C | 5.72882200  | -2.51319200 | -0.02431200 |
| C | 5.54478600  | -0.39256000 | 1.26028300  |
| C | 5.26159700  | -2.56449300 | 2.44622300  |
| H | 5.39726800  | -3.54686500 | -0.14680700 |
| H | 5.54714600  | -1.98253900 | -0.96281300 |

|   |             |             |             |
|---|-------------|-------------|-------------|
| H | 6.80581200  | -2.52181600 | 0.16629200  |
| H | 5.05530900  | 0.15677900  | 2.06923600  |
| H | 6.61317300  | -0.43910300 | 1.48506700  |
| H | 5.42015000  | 0.17163000  | 0.33222300  |
| H | 6.33173200  | -2.55183700 | 2.67054200  |
| H | 4.73036400  | -2.09045600 | 3.27512900  |
| H | 4.94400000  | -3.60781900 | 2.39358200  |
| C | -0.68707900 | -1.96591300 | 0.02553500  |
| C | -1.34084300 | -3.22143400 | -0.09218800 |

B-1-PP-D<sub>1</sub>

Energy (with Zero-point Energy correction) = -1685.991043 (-1685.304617) Hartree

Free energy (298 K) = -1685.372732 Hartree

Zero number of imaginary frequency

0 2

|   |             |             |             |
|---|-------------|-------------|-------------|
| C | -3.39583100 | -2.11227400 | -0.76286900 |
| C | -2.68022500 | -3.28935400 | -0.62117100 |
| C | -1.41223400 | -0.80684400 | -0.13200800 |
| C | -2.72722100 | -0.87991000 | -0.51435600 |
| C | 0.73393200  | -2.00159700 | 0.08441300  |
| C | 1.48733900  | -3.25453800 | 0.23387700  |
| C | 0.89092300  | -4.51991000 | 0.08429600  |
| C | 2.84544400  | -3.12925000 | 0.58066900  |
| H | 3.40561500  | -4.04909000 | 0.70560300  |
| C | 3.46935000  | -1.90842800 | 0.78954100  |
| C | 2.73984900  | -0.71247000 | 0.58423400  |
| C | 1.42706400  | -0.73303400 | 0.16993500  |
| C | 0.68909100  | 0.52063600  | -0.08385400 |
| C | -0.74011800 | 0.48961600  | 0.09341400  |
| H | -1.14357600 | -5.67055500 | -0.34552200 |
| H | -3.16413000 | -4.24606800 | -0.77310000 |
| H | -3.29159200 | 0.02909300  | -0.64447800 |
| H | 1.56799100  | -5.36199000 | 0.20981700  |
| H | 3.22984600  | 0.22964200  | 0.75206100  |
| C | -1.41137400 | 1.66892700  | 0.39137600  |
| C | 1.31049200  | 1.72271600  | -0.41016100 |
| C | 0.57574000  | 2.94640900  | -0.30662200 |
| C | -0.73441900 | 2.92302500  | 0.24673000  |
| C | -2.81046500 | 1.69203900  | 0.91232800  |
| C | -3.83032600 | 2.37196800  | 0.23874900  |
| C | -3.10791600 | 1.05790000  | 2.11948400  |
| C | -5.11560600 | 2.42290200  | 0.76582500  |
| H | -3.60795900 | 2.86174100  | -0.70359800 |
| C | -4.39254500 | 1.11240000  | 2.64895600  |

|   |             |             |             |
|---|-------------|-------------|-------------|
| H | -2.32247900 | 0.52328300  | 2.64170100  |
| C | -5.39866800 | 1.79817200  | 1.97696900  |
| H | -5.89549500 | 2.95164800  | 0.23071600  |
| H | -4.60593400 | 0.62001200  | 3.59013300  |
| H | -6.39905200 | 1.84038200  | 2.39050600  |
| C | 2.71090600  | 1.78240600  | -0.91944000 |
| C | 3.06371900  | 1.05509900  | -2.05787300 |
| C | 3.68645200  | 2.55719700  | -0.28468100 |
| C | 4.36385400  | 1.09379700  | -2.54600000 |
| H | 2.31174000  | 0.44917100  | -2.55066600 |
| C | 4.98668100  | 2.59801000  | -0.77427000 |
| H | 3.42283200  | 3.11701000  | 0.60633500  |
| C | 5.32976100  | 1.86453300  | -1.90575200 |
| H | 4.62230300  | 0.52325800  | -3.43005600 |
| H | 5.73388000  | 3.19589200  | -0.26590600 |
| H | 6.34335700  | 1.89422700  | -2.28712100 |
| C | -1.34809200 | 4.15970400  | 0.58345600  |
| C | 1.12751800  | 4.19922200  | -0.68962000 |
| C | 0.47646300  | 5.37310400  | -0.41659400 |
| C | -0.75477800 | 5.35390100  | 0.26843500  |
| H | -2.30239600 | 4.15572500  | 1.09150000  |
| H | 2.07893000  | 4.22306700  | -1.20239500 |
| H | 0.91583700  | 6.31703700  | -0.71545400 |
| H | -1.24211400 | 6.28465800  | 0.53255800  |
| C | -4.86950100 | -2.06223000 | -1.14319900 |
| C | -5.65114800 | -1.38905700 | 0.00003900  |
| C | -5.03454300 | -1.23124200 | -2.42927000 |
| C | -5.45326900 | -3.45639000 | -1.38592400 |
| H | -5.54142000 | -1.95521600 | 0.92843500  |
| H | -5.30433700 | -0.37012200 | 0.18310500  |
| H | -6.71393500 | -1.34465600 | -0.25486900 |
| H | -4.46511100 | -1.67169400 | -3.25106000 |
| H | -6.08944100 | -1.20502100 | -2.71546000 |
| H | -4.69967600 | -0.20060300 | -2.29386800 |
| H | -6.50682000 | -3.36457300 | -1.65971900 |
| H | -4.93698800 | -3.97175000 | -2.19933000 |
| H | -5.39286300 | -4.07774700 | -0.48946800 |
| C | 4.94257500  | -1.87721900 | 1.18848100  |
| C | 5.76727800  | -2.49034600 | 0.04088600  |
| C | 5.45571400  | -0.45569300 | 1.43929700  |
| C | 5.14627600  | -2.70323300 | 2.47097700  |
| H | 5.48012300  | -3.52500000 | -0.15406800 |
| H | 5.62603000  | -1.91641000 | -0.87856900 |
| H | 6.82940800  | -2.47233700 | 0.30063500  |

|   |             |             |             |
|---|-------------|-------------|-------------|
| H | 4.90155200  | 0.03785300  | 2.24226500  |
| H | 6.50619700  | -0.50070600 | 1.73610800  |
| H | 5.38746600  | 0.16071800  | 0.53975100  |
| H | 6.20045200  | -2.67687200 | 2.75972600  |
| H | 4.55389500  | -2.29316700 | 3.29229000  |
| H | 4.85958500  | -3.74676800 | 2.33433500  |
| C | -0.64500800 | -2.03674300 | -0.10433300 |
| C | -1.31703000 | -3.30883500 | -0.30199200 |
| B | -0.54566800 | -4.64491800 | -0.19743100 |

B-2-PP-D<sub>1</sub>

Energy (with Zero-point Energy correction) = -1686.008186 (-1685.320313) Hartree

Free energy (298 K) = -1685.388221 Hartree

Zero number of imaginary frequency

0 2

|   |             |             |             |
|---|-------------|-------------|-------------|
| C | -3.40575500 | -2.07274600 | -0.83031800 |
| C | -2.76741100 | -3.32678300 | -0.60267400 |
| C | -1.39801300 | -0.82039000 | -0.15858000 |
| C | -2.72403200 | -0.88104400 | -0.59955600 |
| C | -0.46898100 | -4.63455600 | 0.02090500  |
| C | 0.75725000  | -1.98091700 | 0.14541600  |
| C | 1.49758100  | -3.20003700 | 0.34641900  |
| C | 0.85973800  | -4.48570000 | 0.27692500  |
| C | 2.86994400  | -3.12385300 | 0.62164100  |
| H | 3.40837900  | -4.05564500 | 0.76356000  |
| C | 3.53225500  | -1.91434900 | 0.73348000  |
| C | 2.79823900  | -0.73002100 | 0.50554400  |
| C | 1.45960800  | -0.73480500 | 0.15536800  |
| C | 0.69547000  | 0.51686800  | -0.05794700 |
| C | -0.74131100 | 0.46451200  | 0.11275300  |
| H | -0.86548700 | -5.64708200 | -0.01424800 |
| H | -3.34417000 | -4.22359000 | -0.80301600 |
| H | -3.24799000 | 0.04571000  | -0.77327700 |
| H | 1.50706700  | -5.34473100 | 0.44030300  |
| H | 3.30598800  | 0.21156900  | 0.62490700  |
| C | -1.43961300 | 1.63259500  | 0.42669100  |
| C | 1.27908200  | 1.73422400  | -0.38218500 |
| C | 0.52026000  | 2.94446000  | -0.25891000 |
| C | -0.78589000 | 2.89729800  | 0.30418600  |
| C | -2.82809300 | 1.60305300  | 0.96508300  |
| C | -3.86133000 | 2.34302700  | 0.37922900  |
| C | -3.10411000 | 0.85344700  | 2.11110900  |
| C | -5.13397400 | 2.34554800  | 0.93676000  |
| H | -3.66114500 | 2.91237200  | -0.52210200 |

|   |             |             |             |
|---|-------------|-------------|-------------|
| C | -4.37605700 | 0.86002100  | 2.67064500  |
| H | -2.31031600 | 0.26912800  | 2.56252700  |
| C | -5.39284000 | 1.61011700  | 2.08977400  |
| H | -5.92483400 | 2.91893200  | 0.46788800  |
| H | -4.57184000 | 0.27808100  | 3.56318700  |
| H | -6.38420500 | 1.61454200  | 2.52654700  |
| C | 2.67517200  | 1.83964800  | -0.89938100 |
| C | 3.02863000  | 1.17482900  | -2.07466100 |
| C | 3.64245300  | 2.60385000  | -0.23972600 |
| C | 4.32091500  | 1.26826800  | -2.57793600 |
| H | 2.28327700  | 0.57545900  | -2.58518000 |
| C | 4.93398500  | 2.70013000  | -0.74422700 |
| H | 3.37718900  | 3.11615000  | 0.67907200  |
| C | 5.27695700  | 2.03231700  | -1.91587400 |
| H | 4.58001200  | 0.74685500  | -3.49168700 |
| H | 5.67438600  | 3.29089000  | -0.21789300 |
| H | 6.28366000  | 2.10568600  | -2.30947600 |
| C | -1.40847100 | 4.12051600  | 0.67830600  |
| C | 1.04978400  | 4.21047700  | -0.62535700 |
| C | 0.38480200  | 5.37078700  | -0.32578700 |
| C | -0.83604000 | 5.32731700  | 0.37707800  |
| H | -2.35018000 | 4.09371400  | 1.20820200  |
| H | 1.99717600  | 4.25752200  | -1.14395600 |
| H | 0.80965800  | 6.32488200  | -0.61383700 |
| H | -1.32784200 | 6.24754600  | 0.66779300  |
| C | -4.86168600 | -1.97097200 | -1.30235500 |
| C | -5.68316300 | -1.26016000 | -0.21159600 |
| C | -4.92907800 | -1.15237500 | -2.60425500 |
| C | -5.49489400 | -3.34030600 | -1.56872900 |
| H | -5.63572600 | -1.81425900 | 0.72961400  |
| H | -5.31083400 | -0.25187600 | -0.02515100 |
| H | -6.73091400 | -1.18849500 | -0.51927000 |
| H | -4.32450500 | -1.61934800 | -3.38556800 |
| H | -5.96398500 | -1.09934400 | -2.95415400 |
| H | -4.56993100 | -0.13176500 | -2.46141900 |
| H | -6.52342900 | -3.20088800 | -1.91030300 |
| H | -4.95463200 | -3.89004300 | -2.34328800 |
| H | -5.52347400 | -3.95358700 | -0.66516900 |
| C | 5.02493500  | -1.88712100 | 1.06832100  |
| C | 5.79773800  | -2.60280100 | -0.05351700 |
| C | 5.56915100  | -0.45987200 | 1.18552700  |
| C | 5.26682400  | -2.61232200 | 2.40272400  |
| H | 5.48199800  | -3.64268500 | -0.15885400 |
| H | 5.63524900  | -2.09946700 | -1.00999600 |

|   |             |             |             |
|---|-------------|-------------|-------------|
| H | 6.86938400  | -2.59357300 | 0.16496100  |
| H | 5.06584100  | 0.10116100  | 1.97792500  |
| H | 6.63391100  | -0.49830900 | 1.42826900  |
| H | 5.45729700  | 0.09115400  | 0.24835200  |
| H | 6.33208700  | -2.59547200 | 2.64938400  |
| H | 4.71770900  | -2.12414000 | 3.21142900  |
| H | 4.94782100  | -3.65543500 | 2.35942200  |
| B | -1.32973400 | -3.38097700 | -0.18768900 |
| C | -0.63235800 | -2.03997200 | -0.05149100 |

B-3-PP-D<sub>1</sub>

Energy (with Zero-point Energy correction) = -1686.008179 (-1685.318902) Hartree

Free energy (298 K) = -1685.386399 Hartree

Zero number of imaginary frequency

0 2

|   |             |             |             |
|---|-------------|-------------|-------------|
| C | -3.49484600 | -2.10248200 | -0.66157800 |
| C | -2.76144900 | -3.29667100 | -0.57208000 |
| C | -1.36304600 | -3.31014300 | -0.35542100 |
| C | -1.45788800 | -0.73100500 | -0.16630000 |
| C | -2.85066400 | -0.87514000 | -0.47907600 |
| C | -0.58606100 | -4.48286500 | -0.22757500 |
| C | 0.81560900  | -1.96656100 | 0.01905100  |
| C | 1.50246400  | -3.19839500 | 0.17031200  |
| C | 0.78191500  | -4.42352100 | 0.02038300  |
| C | 2.87798100  | -3.17430300 | 0.48511400  |
| H | 3.40989800  | -4.11621700 | 0.58218900  |
| C | 3.53487200  | -1.97439400 | 0.70671500  |
| C | 2.82205900  | -0.76833700 | 0.54685400  |
| C | 1.48231300  | -0.73835800 | 0.14307300  |
| C | 0.70837800  | 0.52625700  | -0.04750800 |
| C | -0.75542100 | 0.51739300  | 0.06923600  |
| H | -1.05165500 | -5.46465900 | -0.30128100 |
| H | -3.27949300 | -4.24364600 | -0.70645300 |
| H | -3.45148100 | 0.01074500  | -0.64630400 |
| H | 1.33758600  | -5.35092700 | 0.11772300  |
| H | 3.33221800  | 0.15441700  | 0.76874800  |
| C | -1.41253400 | 1.73260500  | 0.34457000  |
| C | 1.33042500  | 1.73034800  | -0.35648900 |
| C | 0.60579800  | 2.96493000  | -0.29774800 |
| C | -0.72717100 | 2.96959900  | 0.20418100  |
| C | -2.81692500 | 1.75265500  | 0.83591400  |
| C | -3.82225000 | 2.46634800  | 0.17293600  |
| C | -3.14061800 | 1.07665100  | 2.01605700  |

|   |             |             |             |
|---|-------------|-------------|-------------|
| C | -5.11217900 | 2.51607900  | 0.68701200  |
| H | -3.58372000 | 2.97906000  | -0.75271700 |
| C | -4.42846700 | 1.13691700  | 2.53641000  |
| H | -2.36866900 | 0.51198200  | 2.52642900  |
| C | -5.41595700 | 1.86095600  | 1.87765100  |
| H | -5.88059900 | 3.06815100  | 0.15887700  |
| H | -4.65992300 | 0.61608500  | 3.45782300  |
| H | -6.42024900 | 1.90497800  | 2.28166800  |
| C | 2.75262400  | 1.79798300  | -0.80909600 |
| C | 3.14498600  | 1.12180100  | -1.96541400 |
| C | 3.70520500  | 2.54538700  | -0.11026500 |
| C | 4.46047200  | 1.18547800  | -2.41030000 |
| H | 2.41085000  | 0.53525000  | -2.50629000 |
| C | 5.01988400  | 2.61311000  | -0.55647100 |
| H | 3.40847500  | 3.06934200  | 0.79220900  |
| C | 5.40180000  | 1.93213900  | -1.70851200 |
| H | 4.74935600  | 0.65435400  | -3.30950600 |
| H | 5.74788100  | 3.19174900  | -0.00006900 |
| H | 6.42668000  | 1.98261200  | -2.05629900 |
| C | -1.33388600 | 4.22383800  | 0.50757400  |
| C | 1.18566600  | 4.20569000  | -0.67787900 |
| C | 0.53949000  | 5.39181000  | -0.45002700 |
| C | -0.71614500 | 5.40293700  | 0.19432600  |
| H | -2.29963000 | 4.23951100  | 0.99338000  |
| H | 2.15718400  | 4.21174300  | -1.15223900 |
| H | 1.00286100  | 6.32443800  | -0.74874200 |
| H | -1.19580700 | 6.34512200  | 0.43045600  |
| C | -4.99300500 | -2.08956800 | -1.00645900 |
| C | -5.77048100 | -1.35827600 | 0.09935100  |
| C | -5.20834800 | -1.35681500 | -2.34218400 |
| C | -5.57115300 | -3.50222200 | -1.14173700 |
| H | -5.62666500 | -1.85188600 | 1.06422100  |
| H | -5.44078800 | -0.32277000 | 0.20200200  |
| H | -6.84038700 | -1.35006100 | -0.13028200 |
| H | -4.65585600 | -1.84937800 | -3.14603900 |
| H | -6.27054600 | -1.35278000 | -2.60393900 |
| H | -4.87446300 | -0.31799800 | -2.28844800 |
| H | -6.63818100 | -3.43514700 | -1.36659500 |
| H | -5.09574800 | -4.05987800 | -1.95286800 |
| H | -5.46121600 | -4.07246100 | -0.21544000 |
| C | 5.01898700  | -1.98569500 | 1.09376000  |
| C | 5.82743300  | -2.57664300 | -0.07384000 |
| C | 5.55707300  | -0.58045000 | 1.38093400  |
| C | 5.22506100  | -2.84657800 | 2.35075200  |

|   |             |             |             |
|---|-------------|-------------|-------------|
| H | 5.51290100  | -3.59736000 | -0.30246100 |
| H | 5.69392600  | -1.97027800 | -0.97356300 |
| H | 6.89222800  | -2.59672300 | 0.17589000  |
| H | 5.02146800  | -0.10407200 | 2.20687100  |
| H | 6.61133100  | -0.64805000 | 1.66067400  |
| H | 5.48334400  | 0.06535200  | 0.50273200  |
| H | 6.28160700  | -2.85005500 | 2.63299600  |
| H | 4.64593300  | -2.44967700 | 3.18805400  |
| H | 4.91898900  | -3.88199400 | 2.18939700  |
| B | -0.66433000 | -1.99476100 | -0.21001000 |

B-4-PP-D<sub>1</sub>

Energy (with Zero-point Energy correction) = -1686.014390 (-1685.326450) Hartree

Free energy (298 K) = -1685.394516 Hartree

Zero number of imaginary frequency

0 2

|   |             |             |             |
|---|-------------|-------------|-------------|
| C | -3.62214800 | -2.08365200 | -0.49580100 |
| C | -2.83536700 | -3.21692000 | -0.60462000 |
| C | -3.03400700 | -0.80573000 | -0.18964200 |
| C | 0.64127900  | -1.93298800 | 0.00563600  |
| C | 1.35900900  | -3.16664300 | 0.02393400  |
| C | 0.64636900  | -4.38619600 | -0.27131000 |
| C | 2.70004200  | -3.19567800 | 0.35073900  |
| H | 3.21056300  | -4.15380700 | 0.35967600  |
| C | 3.39242800  | -2.02231100 | 0.72468200  |
| C | 2.71026400  | -0.82524800 | 0.64450400  |
| C | 1.36533300  | -0.72361800 | 0.20399500  |
| C | 0.72183700  | 0.59038600  | 0.03148000  |
| C | -0.71315200 | 0.67870400  | 0.19615700  |
| H | -1.20708500 | -5.31736200 | -0.71669400 |
| H | -3.28999900 | -4.18009700 | -0.81063100 |
| H | -3.72939200 | 0.01861300  | -0.14316100 |
| H | 1.21370000  | -5.31098800 | -0.30203300 |
| H | 3.21261000  | 0.07977400  | 0.94496300  |
| C | 1.47032700  | 1.73445300  | -0.28611700 |
| C | 0.85364900  | 3.01828400  | -0.23581300 |
| C | -0.49375800 | 3.12487400  | 0.21339200  |
| C | -2.71275900 | 2.08943400  | 0.70248000  |
| C | -3.60610000 | 2.64241900  | -0.21784600 |
| C | -3.19513900 | 1.65718600  | 1.93754900  |
| C | -4.95959500 | 2.74179100  | 0.08376100  |
| H | -3.23314500 | 2.97702700  | -1.17996700 |

S101

|   |             |             |             |
|---|-------------|-------------|-------------|
| C | -4.54722600 | 1.76536500  | 2.24491700  |
| H | -2.50285000 | 1.22094300  | 2.64856100  |
| C | -5.43311600 | 2.30353700  | 1.31717100  |
| H | -5.64544700 | 3.15925100  | -0.64414300 |
| H | -4.90983200 | 1.42425500  | 3.20750800  |
| H | -6.48816400 | 2.37967700  | 1.55252400  |
| C | 2.87603200  | 1.65428100  | -0.77949500 |
| C | 3.17308200  | 0.88558600  | -1.90754300 |
| C | 3.91576300  | 2.34334300  | -0.14571400 |
| C | 4.47564700  | 0.79972100  | -2.38453600 |
| H | 2.37220000  | 0.34866000  | -2.40365400 |
| C | 5.21738100  | 2.26340800  | -0.62573100 |
| H | 3.69678400  | 2.93530800  | 0.73664000  |
| C | 5.50262500  | 1.48776200  | -1.74572900 |
| H | 4.68783100  | 0.19841400  | -3.26073200 |
| H | 6.01130300  | 2.79889400  | -0.11826100 |
| H | 6.51762500  | 1.42253700  | -2.11910900 |
| C | 1.52997600  | 4.21446900  | -0.62024100 |
| C | 0.95163300  | 5.44151200  | -0.45195800 |
| H | -2.04567800 | 4.50319700  | 0.82930600  |
| H | 2.51560100  | 4.14935900  | -1.05917000 |
| H | 1.48645100  | 6.33547500  | -0.74966000 |
| H | -0.77726600 | 6.52604600  | 0.27877600  |
| C | -5.13552000 | -2.23506400 | -0.69885500 |
| C | -5.89661600 | -0.91351400 | -0.54819800 |
| C | -5.40180900 | -2.78384300 | -2.11273900 |
| C | -5.68868000 | -3.22248100 | 0.34584600  |
| H | -5.76925900 | -0.48501500 | 0.44856000  |
| H | -5.56917100 | -0.16991600 | -1.27919100 |
| H | -6.96294700 | -1.09432300 | -0.70628000 |
| H | -4.94205600 | -3.76222500 | -2.26032100 |
| H | -6.47900400 | -2.88471300 | -2.27370500 |
| H | -5.00241000 | -2.10440500 | -2.86954400 |
| H | -6.77058400 | -3.32452300 | 0.22156700  |
| H | -5.24008000 | -4.21196900 | 0.24624300  |
| H | -5.49047900 | -2.86041200 | 1.35757000  |
| C | 4.84878000  | -2.12375800 | 1.17269200  |
| C | 5.69198600  | -2.62859600 | -0.01144100 |
| C | 5.40863900  | -0.77125700 | 1.61961500  |
| C | 4.96235800  | -3.11095100 | 2.34672100  |
| H | 5.35675500  | -3.60902700 | -0.35784300 |
| H | 5.62701200  | -1.92896000 | -0.84883200 |
| H | 6.74047800  | -2.71677500 | 0.28666800  |
| H | 4.84192700  | -0.36046100 | 2.45966700  |

|   |             |             |             |
|---|-------------|-------------|-------------|
| H | 6.44462900  | -0.89715700 | 1.94328200  |
| H | 5.39661700  | -0.04566700 | 0.80321500  |
| H | 6.00312200  | -3.18062000 | 2.67419500  |
| H | 4.35707000  | -2.77524100 | 3.19214500  |
| H | 4.63247500  | -4.11474200 | 2.07127300  |
| C | -1.26802100 | 1.93997900  | 0.37081600  |
| C | -1.04616700 | 4.42034800  | 0.42307500  |
| C | -0.34006400 | 5.54885000  | 0.11184100  |
| C | -0.68880900 | -4.38964700 | -0.49987200 |
| C | -1.45117400 | -3.17847600 | -0.43458000 |
| C | -0.76423300 | -1.92352000 | -0.16718300 |
| B | -1.55115600 | -0.64452600 | 0.00487300  |

B-5-PP-D<sub>1</sub>

Energy (with Zero-point Energy correction) = -1686.029623 (-1685.338947) Hartree

Free energy (298 K) = -1685.407123 Hartree

Zero number of imaginary frequency

0 2

|   |             |             |             |
|---|-------------|-------------|-------------|
| C | -3.54724300 | -2.16959700 | -0.59896200 |
| C | -2.77576700 | -3.31444000 | -0.57695900 |
| C | -1.53820900 | -0.81212300 | -0.15782500 |
| C | -2.90090300 | -0.93435900 | -0.37851700 |
| C | -0.61166300 | -4.45871700 | -0.29966600 |
| C | 0.65946500  | -1.95096000 | 0.06668200  |
| C | 1.38222500  | -3.16416000 | 0.17253300  |
| C | 0.71463000  | -4.41623300 | -0.03477200 |
| C | 2.74732400  | -3.14954300 | 0.49831100  |
| H | 3.25779200  | -4.10509400 | 0.56952600  |
| C | 3.43752300  | -1.96669700 | 0.76959800  |
| C | 2.74536600  | -0.77774500 | 0.61155500  |
| C | 1.38943900  | -0.70967700 | 0.18228300  |
| C | 0.73376400  | 0.53051000  | -0.09708900 |
| H | -1.11536400 | -5.40678500 | -0.45517800 |
| H | -3.22096100 | -4.29124500 | -0.72493100 |
| H | -3.50423800 | -0.03530200 | -0.39245500 |
| H | 1.29952900  | -5.32714700 | 0.02947400  |
| H | 3.24587300  | 0.14944800  | 0.83731700  |
| C | -1.38142100 | 1.88808100  | 0.31754300  |
| C | 1.45845300  | 1.77141100  | -0.34993200 |
| C | 0.80640900  | 2.99768600  | -0.21969900 |
| C | -0.57542600 | 3.04827700  | 0.23838400  |
| C | -2.80286700 | 2.03641000  | 0.73817400  |
| C | -3.74369400 | 2.63856400  | -0.10598900 |

S103

|   |             |             |             |
|---|-------------|-------------|-------------|
| C | -3.24534700 | 1.51709200  | 1.95779100  |
| C | -5.08525300 | 2.70956300  | 0.25376800  |
| H | -3.41283800 | 3.03682700  | -1.05964200 |
| C | -4.58497800 | 1.59593900  | 2.32425700  |
| H | -2.52638300 | 1.03818400  | 2.61293400  |
| C | -5.51106500 | 2.18963400  | 1.47277000  |
| H | -5.79913800 | 3.17080300  | -0.41908600 |
| H | -4.90756300 | 1.18486700  | 3.27400500  |
| H | -6.55613300 | 2.24321500  | 1.75391300  |
| C | 2.84999200  | 1.72281500  | -0.86511400 |
| C | 3.15963600  | 0.89131200  | -1.94834800 |
| C | 3.88050400  | 2.46837700  | -0.27617100 |
| C | 4.45587900  | 0.82553100  | -2.44246700 |
| H | 2.37204700  | 0.30019600  | -2.40127500 |
| C | 5.17802400  | 2.39409700  | -0.76576700 |
| H | 3.65828500  | 3.08727200  | 0.58572800  |
| C | 5.46935300  | 1.57573700  | -1.85347800 |
| H | 4.67525300  | 0.18564100  | -3.28878500 |
| H | 5.96478800  | 2.96779100  | -0.29037100 |
| H | 6.48151200  | 1.51884100  | -2.23570300 |
| C | -1.09835200 | 4.34096800  | 0.55574500  |
| C | 1.44555800  | 4.23900500  | -0.58454900 |
| C | 0.87096800  | 5.44282400  | -0.33625500 |
| C | -0.40458600 | 5.48594100  | 0.29346500  |
| H | -2.08483400 | 4.40255700  | 0.99639500  |
| H | 2.40415200  | 4.20442500  | -1.08294200 |
| H | 1.37093600  | 6.36117600  | -0.61650900 |
| H | -0.84446200 | 6.44557500  | 0.54212500  |
| C | -5.05807200 | -2.18235600 | -0.83073200 |
| C | -5.75825000 | -1.61134000 | 0.41423600  |
| C | -5.39494100 | -1.30468800 | -2.04858700 |
| C | -5.59162800 | -3.59426600 | -1.08847500 |
| H | -5.52924500 | -2.21617100 | 1.29553400  |
| H | -5.44365700 | -0.58531900 | 0.61611600  |
| H | -6.84237500 | -1.61169500 | 0.26666400  |
| H | -4.88830900 | -1.67410400 | -2.94369400 |
| H | -6.47326800 | -1.31994100 | -2.23072100 |
| H | -5.09606800 | -0.26640200 | -1.89036800 |
| H | -6.67021200 | -3.55056600 | -1.25701000 |
| H | -5.13136600 | -4.04182200 | -1.97338700 |
| H | -5.41451000 | -4.25225400 | -0.23381000 |
| C | 4.90738600  | -2.02228800 | 1.18893500  |
| C | 5.72751500  | -2.61069700 | 0.02832000  |
| C | 5.46307900  | -0.63299900 | 1.51308900  |

|   |             |             |             |
|---|-------------|-------------|-------------|
| C | 5.05899400  | -2.91178400 | 2.43351700  |
| H | 5.39547600  | -3.61906200 | -0.22952200 |
| H | 5.63202300  | -1.98209500 | -0.86099700 |
| H | 6.78452200  | -2.66333600 | 0.30381800  |
| H | 4.91366400  | -0.16121500 | 2.33243900  |
| H | 6.50825600  | -0.72319000 | 1.81857300  |
| H | 5.42289700  | 0.02625400  | 0.64261300  |
| H | 6.10795900  | -2.94986100 | 2.73947700  |
| H | 4.47185200  | -2.51463900 | 3.26500400  |
| H | 4.72943700  | -3.93571200 | 2.24542300  |
| C | -0.75551800 | -2.00078900 | -0.16302700 |
| C | -1.38664700 | -3.25695900 | -0.35483000 |
| B | -0.79465000 | 0.55314800  | -0.01263200 |

B-6-PP-D<sub>1</sub>

Energy (with Zero-point Energy correction) = -1686.023293 (-1685.335437) Hartree

Free energy (298 K) = -1685.403208 Hartree

Zero number of imaginary frequency

0 2

|   |             |             |             |
|---|-------------|-------------|-------------|
| C | -3.41940100 | -2.13139600 | -0.74845200 |
| C | -2.66604300 | -3.28602200 | -0.72600200 |
| C | -1.40337200 | -0.79479500 | -0.22479900 |
| C | -2.77066100 | -0.90312700 | -0.50491400 |
| C | 0.75065200  | -1.94117300 | 0.02141800  |
| C | 1.48786400  | -3.13899700 | 0.14098700  |
| C | 0.83434600  | -4.38633000 | -0.10358600 |
| C | 2.84380400  | -3.08283400 | 0.51203700  |
| H | 3.38603900  | -4.02026800 | 0.59162100  |
| C | 3.47675300  | -1.88365200 | 0.81120800  |
| C | 2.74176000  | -0.70690500 | 0.64397400  |
| C | 1.41267300  | -0.69369100 | 0.17917400  |
| C | 0.68969300  | 0.53864300  | -0.10664400 |
| C | -0.76163400 | 0.47812600  | 0.02072900  |
| H | -0.98246100 | -5.38080600 | -0.58417200 |
| H | -3.11691900 | -4.25596200 | -0.89605100 |
| H | -3.35172600 | 0.00475700  | -0.56417100 |
| H | 1.41637000  | -5.29883500 | -0.03513300 |
| H | 3.20089200  | 0.23481100  | 0.89607700  |
| C | 1.36486500  | 1.74696700  | -0.41826100 |
| C | 0.65695900  | 2.97998000  | -0.36174500 |
| C | -0.68113100 | 3.04003000  | 0.16939500  |
| C | -2.96521500 | 1.79914500  | 0.94443400  |
| C | -3.99545000 | 2.50347200  | 0.30254000  |

|   |             |             |             |
|---|-------------|-------------|-------------|
| C | -3.29667700 | 1.11900700  | 2.12606800  |
| C | -5.28931000 | 2.53463400  | 0.81645100  |
| H | -3.77984900 | 3.03464100  | -0.62009700 |
| C | -4.58158500 | 1.16123400  | 2.65706200  |
| H | -2.52788700 | 0.54930200  | 2.63901600  |
| C | -5.58437300 | 1.87039200  | 2.00280700  |
| H | -6.06512500 | 3.08372600  | 0.29467400  |
| H | -4.80334700 | 0.63544700  | 3.57896700  |
| H | -6.58816000 | 1.89986600  | 2.41040900  |
| C | 2.78767800  | 1.74604200  | -0.84732000 |
| C | 3.21376700  | 0.92593900  | -1.90027700 |
| C | 3.74187900  | 2.56151200  | -0.22151300 |
| C | 4.54221800  | 0.91576400  | -2.30819300 |
| H | 2.48748400  | 0.29344800  | -2.39871800 |
| C | 5.06792400  | 2.56090000  | -0.63525500 |
| H | 3.43076700  | 3.19320500  | 0.60352600  |
| C | 5.47546200  | 1.73459300  | -1.67928000 |
| H | 4.84709800  | 0.27516200  | -3.12761100 |
| H | 5.78752300  | 3.19760900  | -0.13371400 |
| H | 6.51020600  | 1.73060000  | -2.00052500 |
| C | -1.26870200 | 4.31936700  | 0.34768700  |
| C | 1.25194700  | 4.19879800  | -0.82691800 |
| C | 0.62345300  | 5.40108300  | -0.66996500 |
| C | -0.64018900 | 5.47625700  | -0.03578800 |
| H | -2.25077700 | 4.37226000  | 0.80354400  |
| H | 2.20810300  | 4.16563000  | -1.33116200 |
| H | 1.09508700  | 6.30505400  | -1.03832400 |
| H | -1.11118000 | 6.43941500  | 0.12101800  |
| C | -4.92268400 | -2.11180000 | -1.02564300 |
| C | -5.64195500 | -1.44768000 | 0.16070500  |
| C | -5.19037300 | -1.29600700 | -2.30210300 |
| C | -5.48853600 | -3.52096700 | -1.21957900 |
| H | -5.45156300 | -1.99756100 | 1.08613900  |
| H | -5.31385300 | -0.41667600 | 0.31063300  |
| H | -6.72100900 | -1.43440100 | -0.01794300 |
| H | -4.67016300 | -1.73259300 | -3.15830300 |
| H | -6.26236600 | -1.28495800 | -2.51769100 |
| H | -4.86044400 | -0.26070400 | -2.19266900 |
| H | -6.56380200 | -3.45871200 | -1.40145700 |
| H | -5.03364000 | -4.02318500 | -2.07750200 |
| H | -5.33498000 | -4.13942700 | -0.33134900 |
| C | 4.93864500  | -1.87982100 | 1.26458500  |
| C | 5.81018200  | -2.39362500 | 0.10602400  |
| C | 5.41716100  | -0.47426600 | 1.63930500  |

|   |             |             |             |
|---|-------------|-------------|-------------|
| C | 5.10843300  | -2.79575900 | 2.48729100  |
| H | 5.53308200  | -3.40945300 | -0.18590300 |
| H | 5.70243700  | -1.74478500 | -0.76714800 |
| H | 6.86243200  | -2.40242000 | 0.40327500  |
| H | 4.82502700  | -0.05165700 | 2.45581900  |
| H | 6.45684500  | -0.52399900 | 1.97114700  |
| H | 5.37005900  | 0.20671600  | 0.78606500  |
| H | 6.15046000  | -2.78587600 | 2.81746400  |
| H | 4.48227800  | -2.45494500 | 3.31531000  |
| H | 4.84116800  | -3.83067300 | 2.26344100  |
| C | -0.64251800 | -1.99481200 | -0.25788000 |
| C | -1.27091000 | -3.23617500 | -0.47752900 |
| B | -1.48108900 | 1.75918000  | 0.39439400  |
| C | -0.49050800 | -4.43032600 | -0.40898000 |

B-7-PP-D<sub>1</sub>

Energy (with Zero-point Energy correction) = -1685.987597 (-1685.300987) Hartree

Free energy (298 K) = -1685.368023 Hartree

Zero number of imaginary frequency

0 2

|   |             |             |             |
|---|-------------|-------------|-------------|
| C | -3.46282000 | -1.98475500 | -0.81935300 |
| C | -2.76677100 | -3.16772500 | -0.68120000 |
| C | -2.76823000 | -0.78099600 | -0.58937800 |
| C | -0.65896700 | -4.38701700 | -0.24911400 |
| C | 0.69095600  | -1.93812800 | 0.09405300  |
| C | 1.38368900  | -3.16297200 | 0.23656700  |
| C | 0.67245600  | -4.38353500 | 0.05351500  |
| C | 2.75949600  | -3.15840500 | 0.54271100  |
| H | 3.26712900  | -4.11283100 | 0.63579800  |
| C | 3.44069300  | -1.96894800 | 0.75521200  |
| C | 2.73930000  | -0.77037300 | 0.58786600  |
| C | 1.39041700  | -0.70889600 | 0.17390800  |
| C | 0.69346500  | 0.55056300  | -0.06737600 |
| H | -1.18685900 | -5.32398700 | -0.38963900 |
| H | -3.25270100 | -4.12429000 | -0.83144600 |
| H | -3.28689800 | 0.15063700  | -0.76307500 |
| H | 1.21410800  | -5.31801500 | 0.15179300  |
| H | 3.24211700  | 0.15543300  | 0.81148000  |
| C | -1.46740900 | 1.70781800  | 0.38568600  |
| C | 1.37026600  | 1.75975600  | -0.35982200 |
| C | 0.67995600  | 2.99254200  | -0.30281500 |
| C | -2.80750000 | 1.65872200  | 0.98013800  |
| C | -3.84065900 | 2.51409600  | 0.55025300  |

|   |             |             |             |
|---|-------------|-------------|-------------|
| C | -3.08560000 | 0.78565400  | 2.05384600  |
| C | -5.08564800 | 2.49447100  | 1.15975200  |
| H | -3.64817600 | 3.18564600  | -0.27827300 |
| C | -4.32852300 | 0.77667100  | 2.66919100  |
| H | -2.29629100 | 0.13225600  | 2.40808600  |
| C | -5.33487500 | 1.63109200  | 2.22751200  |
| H | -5.86750500 | 3.15669000  | 0.80639600  |
| H | -4.51157500 | 0.10705400  | 3.50140200  |
| H | -6.30492500 | 1.62792400  | 2.71008500  |
| C | 2.79189900  | 1.75416900  | -0.81051500 |
| C | 3.18424000  | 0.98310200  | -1.91052500 |
| C | 3.75400000  | 2.54998900  | -0.17725100 |
| C | 4.49855500  | 1.00372700  | -2.36070400 |
| H | 2.44374300  | 0.36845300  | -2.41021100 |
| C | 5.06849400  | 2.57358800  | -0.62900200 |
| H | 3.45852200  | 3.14812700  | 0.67787300  |
| C | 5.44598600  | 1.79948100  | -1.72211900 |
| H | 4.78237400  | 0.40464400  | -3.21814200 |
| H | 5.79979000  | 3.19362300  | -0.12372100 |
| H | 6.47022800  | 1.81717500  | -2.07519300 |
| C | -1.33800100 | 4.45750700  | 0.46174400  |
| C | 1.25094900  | 4.21078300  | -0.77312400 |
| C | 0.62854600  | 5.43536600  | -0.59580900 |
| C | -0.62622300 | 5.56175700  | 0.04465600  |
| H | -2.28589700 | 4.64028100  | 0.96114600  |
| H | 2.18825100  | 4.19302800  | -1.32193600 |
| H | 1.12649400  | 6.32938100  | -0.95487900 |
| H | -1.01719400 | 6.56389500  | 0.19903300  |
| C | -4.93606600 | -1.91506000 | -1.22165500 |
| C | -5.71581600 | -1.14449400 | -0.14368800 |
| C | -5.05685000 | -1.17667000 | -2.56551900 |
| C | -5.55388700 | -3.30765000 | -1.37352600 |
| H | -5.63043200 | -1.64096000 | 0.82647400  |
| H | -5.34652900 | -0.12307600 | -0.02718700 |
| H | -6.77426900 | -1.09165100 | -0.41404200 |
| H | -4.49884200 | -1.69916800 | -3.34631100 |
| H | -6.10636200 | -1.12299000 | -2.86751900 |
| H | -4.67502800 | -0.15565400 | -2.49974200 |
| H | -6.60743100 | -3.20944600 | -1.64442600 |
| H | -5.06032700 | -3.88430600 | -2.16017900 |
| H | -5.50032400 | -3.87343100 | -0.43964300 |
| C | 4.92352300  | -1.99515000 | 1.13658100  |
| C | 5.71696200  | -2.59212400 | -0.03829700 |
| C | 5.47057200  | -0.59320000 | 1.42064400  |

|   |             |             |             |
|---|-------------|-------------|-------------|
| C | 5.12549400  | -2.86108500 | 2.39037600  |
| H | 5.39046600  | -3.60916100 | -0.26781200 |
| H | 5.58588700  | -1.98054400 | -0.93477900 |
| H | 6.78243900  | -2.62465600 | 0.20595200  |
| H | 4.94316100  | -0.11485000 | 2.25056700  |
| H | 6.52618300  | -0.66644300 | 1.69311000  |
| H | 5.39468400  | 0.05339700  | 0.54304500  |
| H | 6.18283900  | -2.87344200 | 2.66822900  |
| H | 4.55355400  | -2.46150500 | 3.23128500  |
| H | 4.81187700  | -3.89430700 | 2.22769800  |
| C | -0.70801400 | -1.94668100 | -0.16726800 |
| C | -1.38561500 | -3.16982000 | -0.37307000 |
| C | -1.42697700 | -0.73029600 | -0.18989300 |
| C | -0.74546400 | 0.53910200  | 0.09468600  |
| B | -0.75725800 | 3.06024200  | 0.21429200  |

B-8-PP-D<sub>1</sub>

Energy (with Zero-point Energy correction) = -1685.989435 (-1685.303970) Hartree

Free energy (298 K) = -1685.371525 Hartree

Zero number of imaginary frequency

0 2

|   |             |             |             |
|---|-------------|-------------|-------------|
| C | -3.44191100 | -2.00953800 | -0.81575600 |
| C | -2.71973000 | -3.18181900 | -0.71546900 |
| C | -1.42704100 | -0.73340300 | -0.19002000 |
| C | -2.77630200 | -0.80001600 | -0.54932900 |
| C | 0.72233000  | -1.93420900 | 0.08052900  |
| C | 1.41891700  | -3.15353700 | 0.22246600  |
| C | 0.71820800  | -4.38586900 | 0.01684600  |
| C | 2.78629000  | -3.13502800 | 0.55272900  |
| H | 3.29935600  | -4.08693300 | 0.64741100  |
| C | 3.46496400  | -1.94860300 | 0.77210500  |
| C | 2.76196000  | -0.74846800 | 0.58650600  |
| C | 1.42517400  | -0.71161000 | 0.18907500  |
| C | 0.71251800  | 0.54901000  | -0.06350700 |
| C | -0.75295800 | 0.52447700  | 0.09360000  |
| H | -1.12303000 | -5.32711400 | -0.46878000 |
| H | -3.19025300 | -4.14294900 | -0.88443000 |
| H | -3.33323600 | 0.11949300  | -0.64289700 |
| H | 1.26848300  | -5.31527400 | 0.11349900  |
| H | 3.27151300  | 0.18392100  | 0.76471500  |
| C | 1.32271700  | 1.73222700  | -0.42085600 |
| C | 0.55772000  | 2.95319700  | -0.39242000 |
| C | -0.73990000 | 2.96292000  | 0.30523000  |
| C | -2.77857200 | 1.70266300  | 1.01435200  |

S109

|   |             |             |             |
|---|-------------|-------------|-------------|
| C | -3.81300200 | 2.44694800  | 0.44235200  |
| C | -3.04529400 | 0.94688700  | 2.15755800  |
| C | -5.08335800 | 2.44145900  | 1.00593200  |
| H | -3.60985300 | 3.03902900  | -0.44265900 |
| C | -4.31255400 | 0.94995100  | 2.72876300  |
| H | -2.24648200 | 0.36511600  | 2.60426500  |
| C | -5.33505300 | 1.69856200  | 2.15547600  |
| H | -5.87457500 | 3.02684000  | 0.55271300  |
| H | -4.49966200 | 0.37057300  | 3.62509400  |
| H | -6.32316100 | 1.70138500  | 2.60006400  |
| C | 2.74530900  | 1.80094900  | -0.86519900 |
| C | 3.17162500  | 1.06460100  | -1.97153600 |
| C | 3.67012200  | 2.60498600  | -0.19268400 |
| C | 4.49724100  | 1.11687300  | -2.38818900 |
| H | 2.45651500  | 0.44276700  | -2.49860700 |
| C | 4.99474500  | 2.65908500  | -0.60932600 |
| H | 3.34045600  | 3.18905100  | 0.65960400  |
| C | 5.41301200  | 1.91308700  | -1.70776100 |
| H | 4.81289300  | 0.54100800  | -3.25017200 |
| H | 5.70149600  | 3.28297600  | -0.07501300 |
| H | 6.44547100  | 1.95588800  | -2.03353700 |
| C | 1.07438800  | 4.14034200  | -0.94203200 |
| C | 0.46378500  | 5.35118100  | -0.70876500 |
| C | -0.67784100 | 5.51028000  | 0.13315600  |
| H | -2.29660400 | 4.38769300  | 1.43476800  |
| H | 1.98630100  | 4.10372600  | -1.52194300 |
| H | 0.91250600  | 6.23203600  | -1.16361000 |
| H | -1.03679700 | 6.52563600  | 0.26942700  |
| C | -4.92534100 | -1.96375700 | -1.18317000 |
| C | -5.70450100 | -1.31323800 | -0.02813100 |
| C | -5.10770000 | -1.12306600 | -2.45818900 |
| C | -5.49613900 | -3.36154800 | -1.43676800 |
| H | -5.58036300 | -1.88650300 | 0.89431800  |
| H | -5.36503200 | -0.29333900 | 0.16437000  |
| H | -6.77026000 | -1.27452900 | -0.27099300 |
| H | -4.54425700 | -1.55211700 | -3.29039400 |
| H | -6.16483700 | -1.09371700 | -2.73559300 |
| H | -4.77260600 | -0.09367800 | -2.31390000 |
| H | -6.55385300 | -3.27938300 | -1.69643300 |
| H | -4.98646000 | -3.86074800 | -2.26513900 |
| H | -5.42002800 | -3.99343000 | -0.54806900 |
| C | 4.94635800  | -1.96920300 | 1.15857500  |
| C | 5.74775100  | -2.58190400 | -0.00264800 |
| C | 5.49102700  | -0.56281600 | 1.42718100  |

|   |             |             |             |
|---|-------------|-------------|-------------|
| C | 5.14059400  | -2.81798600 | 2.42530500  |
| H | 5.42660100  | -3.60371400 | -0.21736400 |
| H | 5.61934700  | -1.98594300 | -0.90992400 |
| H | 6.81199800  | -2.60652600 | 0.24746400  |
| H | 4.95592700  | -0.07245500 | 2.24506800  |
| H | 6.54385700  | -0.63215900 | 1.71075200  |
| H | 5.42429400  | 0.07194600  | 0.53985300  |
| H | 6.19685900  | -2.83126600 | 2.70701700  |
| H | 4.56743000  | -2.40464200 | 3.25864200  |
| H | 4.82226000  | -3.85164500 | 2.27507200  |
| C | -0.68321800 | -1.94643900 | -0.18619700 |
| C | -1.33967300 | -3.16997800 | -0.40713800 |
| C | -0.59960600 | -4.39208000 | -0.30236600 |
| C | -1.39785800 | 1.72232400  | 0.44760200  |
| B | -1.34148600 | 4.31232600  | 0.72961000  |

B-9-PP-D<sub>1</sub>

Energy (with Zero-point Energy correction) = -1685.995097 (-1685.308848) Hartree

Free energy (298 K) = -1685.376240 Hartree

Zero number of imaginary frequency

0 2

|   |             |             |             |
|---|-------------|-------------|-------------|
| C | -3.38195600 | -2.03177600 | -0.82055000 |
| C | -2.65309500 | -3.19877500 | -0.67308300 |
| C | -1.39777600 | -0.74002400 | -0.16029300 |
| C | -2.73444500 | -0.81713900 | -0.55107800 |
| C | 0.76827500  | -1.91775200 | 0.13352000  |
| C | 1.47398100  | -3.13145800 | 0.29734400  |
| C | 0.77383500  | -4.37387100 | 0.12371500  |
| C | 2.84078200  | -3.09874000 | 0.60614000  |
| H | 3.36281700  | -4.04355100 | 0.71801900  |
| C | 3.51151400  | -1.89833000 | 0.78090600  |
| C | 2.79910200  | -0.70705500 | 0.58079400  |
| C | 1.45812900  | -0.68834100 | 0.20584900  |
| C | 0.71679500  | 0.56317500  | -0.04492300 |
| C | -0.73551200 | 0.53897700  | 0.11847400  |
| H | -1.05808300 | -5.33527700 | -0.34838300 |
| H | -3.11598100 | -4.16529500 | -0.83381800 |
| H | -3.29610600 | 0.09624600  | -0.66939300 |
| H | 1.32932200  | -5.29764400 | 0.24273200  |
| H | 3.30776300  | 0.23120000  | 0.72889800  |
| C | 1.29168000  | 1.75698000  | -0.41144200 |
| C | 0.51950000  | 2.98331900  | -0.34106400 |
| C | -0.77965100 | 2.98145200  | 0.35794700  |

|   |             |             |             |
|---|-------------|-------------|-------------|
| C | -2.81486200 | 1.66620000  | 1.00081200  |
| C | -3.84764200 | 2.39431900  | 0.40116400  |
| C | -3.09712100 | 0.91385200  | 2.14263800  |
| C | -5.13006000 | 2.37222900  | 0.93520800  |
| H | -3.63208400 | 2.98895000  | -0.47935400 |
| C | -4.37862000 | 0.89853200  | 2.68197900  |
| H | -2.30094700 | 0.34663200  | 2.61199100  |
| C | -5.39788400 | 1.62939800  | 2.08189300  |
| H | -5.91923900 | 2.94274300  | 0.46004700  |
| H | -4.57836200 | 0.31880300  | 3.57525900  |
| H | -6.39613600 | 1.61929500  | 2.50288900  |
| C | 2.69352700  | 1.84135000  | -0.90682300 |
| C | 3.08522600  | 1.08389600  | -2.01231600 |
| C | 3.63538200  | 2.66333800  | -0.28054400 |
| C | 4.39345700  | 1.13895400  | -2.47693100 |
| H | 2.35673500  | 0.44423000  | -2.49756900 |
| C | 4.94522800  | 2.71418400  | -0.74263000 |
| H | 3.33593400  | 3.25360400  | 0.57849200  |
| C | 5.32784900  | 1.95211000  | -1.84221000 |
| H | 4.68291200  | 0.54901400  | -3.33841800 |
| H | 5.66739300  | 3.34809500  | -0.24203300 |
| H | 6.34821700  | 1.99347700  | -2.20412900 |
| C | 1.00373500  | 4.17162900  | -0.85863700 |
| C | 0.37006500  | 5.40836000  | -0.59791400 |
| H | -2.28347700 | 4.08938700  | 1.35128200  |
| H | 1.90917900  | 4.14765400  | -1.45377400 |
| H | 0.83950300  | 6.27661000  | -1.05681800 |
| H | -1.34107000 | 6.55177600  | 0.60663200  |
| C | -4.85326300 | -2.00706200 | -1.23690100 |
| C | -5.67781200 | -1.35369700 | -0.11579000 |
| C | -5.00302700 | -1.18220100 | -2.52630700 |
| C | -5.40049000 | -3.41371700 | -1.49410200 |
| H | -5.57738000 | -1.91506800 | 0.81682300  |
| H | -5.35524800 | -0.32825100 | 0.07535100  |
| H | -6.73553100 | -1.32950000 | -0.39335900 |
| H | -4.40854700 | -1.61421000 | -3.33502300 |
| H | -6.05079800 | -1.16653600 | -2.83821700 |
| H | -4.68271700 | -0.14795200 | -2.38266500 |
| H | -6.44891400 | -3.34534800 | -1.79258100 |
| H | -4.85611700 | -3.91735400 | -2.29729300 |
| H | -5.35074800 | -4.03459500 | -0.59586000 |
| C | 4.99875900  | -1.89880700 | 1.14616600  |
| C | 5.78738500  | -2.55450900 | -0.00031500 |
| C | 5.54530000  | -0.48252100 | 1.35294700  |

|   |             |             |             |
|---|-------------|-------------|-------------|
| C | 5.21319100  | -2.69715100 | 2.44222100  |
| H | 5.46797000  | -3.58514100 | -0.16937600 |
| H | 5.64342300  | -1.99666200 | -0.92925300 |
| H | 6.85522300  | -2.56444300 | 0.23563600  |
| H | 5.02457900  | 0.03642100  | 2.16233000  |
| H | 6.60363600  | -0.53949100 | 1.61865300  |
| H | 5.45923200  | 0.11929300  | 0.44443700  |
| H | 6.27325200  | -2.69742100 | 2.71028900  |
| H | 4.64961500  | -2.25296300 | 3.26619400  |
| H | 4.89426400  | -3.73592100 | 2.33579500  |
| C | -0.63976700 | -1.94231300 | -0.12714500 |
| C | -1.28763900 | -3.17601500 | -0.33595600 |
| C | -0.53910900 | -4.39488600 | -0.19890200 |
| C | -1.42130400 | 1.70869900  | 0.47062100  |
| B | -0.85077700 | 5.50222600  | 0.32029200  |
| C | -1.37659300 | 4.18319900  | 0.76453400  |
